# Supplementary material
Source: MDPI journal article supplement (https://www.mdpi.com/2311-7524/9/4/428)
Supplement: s1 [file s1]

**Supplementary Figures:**

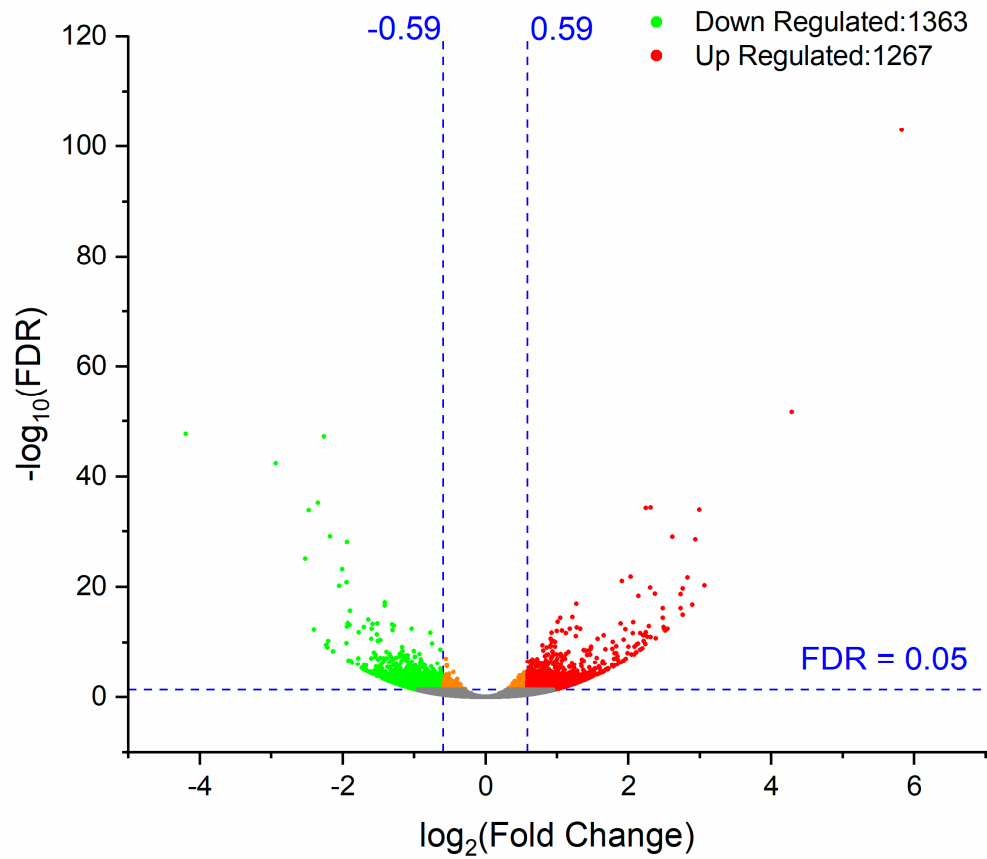

**Figure S1.** Volcanic map depicting the number of upregulated and downregulated differentially expressed genes between ethephon and water treatments. The screening criteria: unigenes with Fold Change (FC, FPKM in ethylene treatment samples/ FPKM in water treatment samples)  $\geq 1.5$  and with FDR  $\leq 0.05$ .

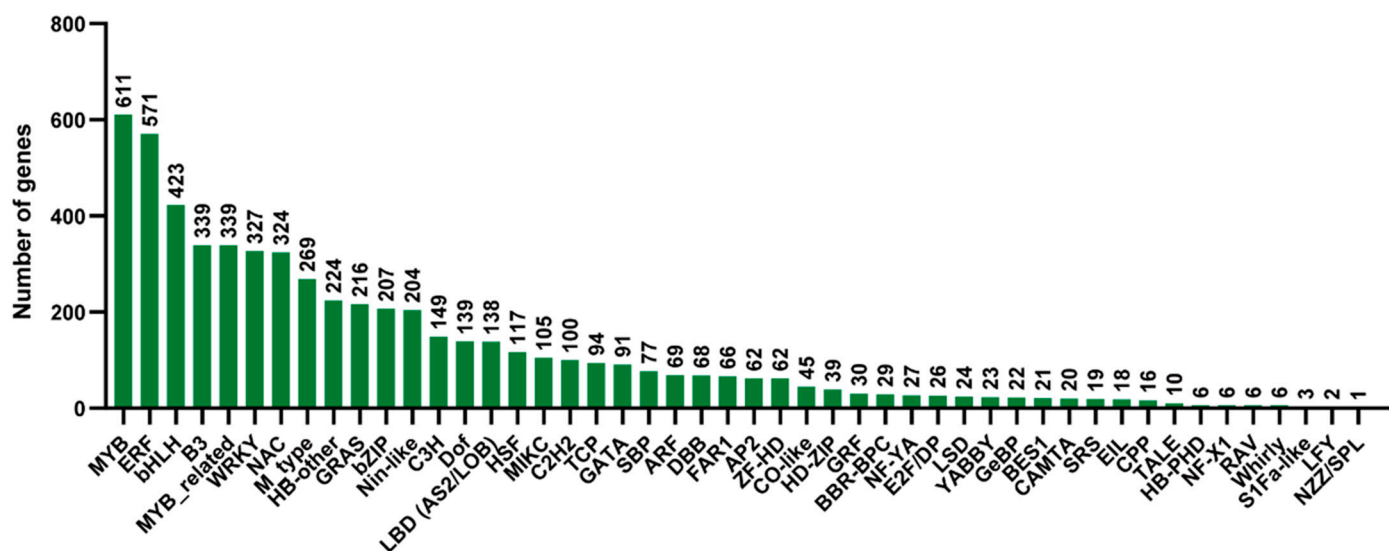

Figure S2. Number of unigenes from different transcription factor families.

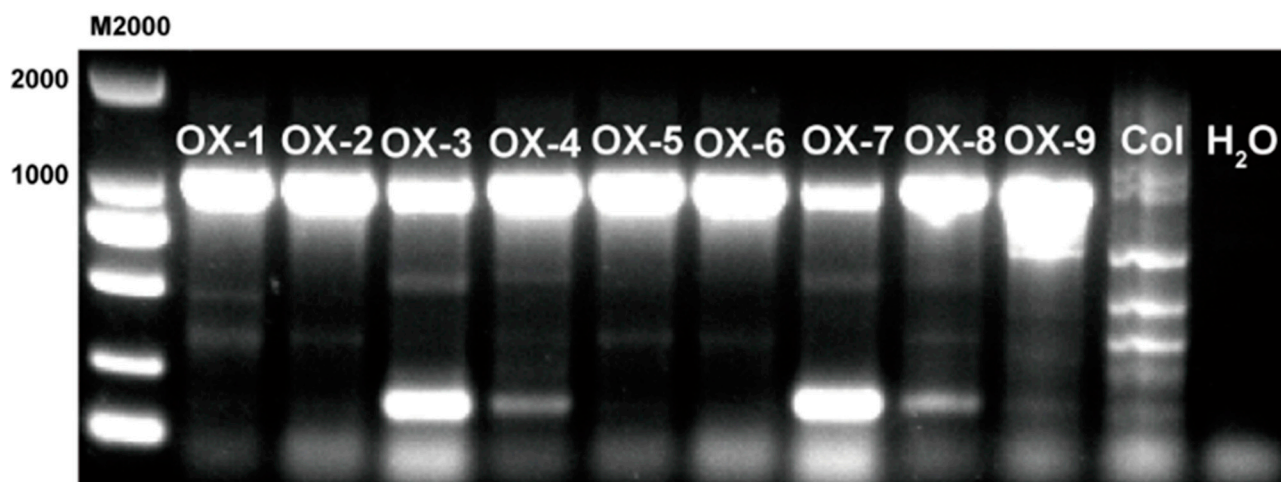

**Figure S3.** Identification of *CmAFL1* transgenic *Arabidopsis thaliana* at the DNA vel. OX-1 to OX-9: nine independent transgenic lines. Col: wildtype; H<sub>2</sub>O: negative control. Primers: *CmAFL1*-F and GFP-R.
