# Supplementary material
Source: MDPI journal article supplement (https://www.mdpi.com/2311-7524/9/4/428)
Supplement: s1 [file s1]

Archive with 6 entries (6 files):
- Supplementary_Figures(update).pdf
- Table S1 Primers used in the present study(update)3.21.xlsx
- Table S2 Statistics for sequencing.xlsx
- Table S3  Statistical comparison of sample sequencing data with the selected reference genomes.xlsx
- Table S4  All of the different expression genes.xlsx
- Table S5 Differentially expressed genes related to flowering time following ethephon treatment.xlsx
