# Supplementary material
Source: MDPI journal article supplement (https://www.mdpi.com/2311-7524/9/4/428)
Supplement: s1 [file s1 › Table S1 Primers used in the present study(update)3.21.xlsx]

## Sheet: Sheet1
Table S1. Primers used in the present study
Primers	Sequence (5’–3’)	Purpose
evm.TU.scaffold_609.8-F	AAGGTTTGTGATTTCGGGTTAT	qPCR
evm.TU.scaffold_609.8-R	TCAGATTTTTCGTTTGAGGGCT	qPCR
evm.TU.scaffold_573.137-F	TCTGGTAGAGCAGCAAAACCCCGA	qPCR
evm.TU.scaffold_573.137-R	AGGGGGCAAGACTATTGATGGTT	qPCR
evm.TU.scaffold_1536.8-F	TAAGCAAAAAGGAAGACAAACT	qPCR
evm.TU.scaffold_1536.8-R	TGAAGAAGTTAGCAGCAACAGGTAA	qPCR
evm.model.scaffold_3077.39-F	CAAGAGCACACCTTTCCTA	qPCR
evm.model.scaffold_3077.39-R	TCGCACCTCCAAAGATTCTCA	qPCR
CmAFL1-R4-F	CTAGAAGGCCTTGGATCCAATGGGGAGGGGACGGGT	Construction of overexpression Vector
CmAFL1-R4-R	GCAAAGTCGACGAATTCTCTCGTTCATGTGCTGCAG	Construction of overexpression Vector
CmAFL1-F	ATGGGGAGGGGACGGGTGACG	DNA identification/semi-quantitative PCR
GFP-R	GTGCCGCTTCATATGATCT	DNA identification
CmAFL1-R	CTACTCGTTCATGTGCTGCAG	Semi-quantitative PCR
Actin2-F	GGTAACATTGTGCTCAGTGGTGG	Semi-quantitative PCR
Actin2-R	AACGACCTTAATCTTCATGCTGC	Semi-quantitative PCR
SRDX-F	CCCAGATTAGCTTTTCAATTTCAGAAAGAATG	Vector modification primer
SRDX-R	TATCAACAGTGAAGAACTTGCTTTTG	Vector modification primer
