# Supplementary material
Source: MDPI journal article supplement (https://www.mdpi.com/2311-7524/9/4/428)
Supplement: s1 [file s1 › Table S2 Statistics for sequencing.xlsx]

## Sheet: Sheet1
Table S2. Statistics for sequencing
Samples	Clean reads	Clean bases	GC content	% ≥ Q30
C-1	28778370	8633511000	0.4199	0.9236
C-2	33078902	9923670600	0.4192	0.921
C-3	26686859	8006057700	0.4181	0.9229
T-1	25867776	7760332800	0.4238	0.9166
T-2	29765710	8929713000	0.4238	0.9183
T-3	23984171	7195251300	0.4214	0.9383
