# Supplementary material
Source: MDPI journal article supplement (https://www.mdpi.com/2311-7524/9/4/428)
Supplement: s1 [file s1 › Table S3 Statistical comparison of sample sequencing data with the selected reference genomes.xlsx]

## Sheet: Sheet1
Table S3. Statistical comparison of sample sequencing data with the selected reference genomes
BMK­ID	Total reads	Mapped reads	Unique mapped reads	Multiple mapped reads	Reads mapped to ”+”	Reads mapped to “-“
C-1	57556740	44,180,214 (76.76%)	32,713,567 (56.84%)	11,466,647 (19.92%)	20,397,245 (35.44%)	21,220,138 (36.87%)
C-2	66157804	51,138,696 (77.30%)	38,018,567 (57.47%)	13,120,129 (19.83%)	23,610,743 (35.69%)	24,573,561 (37.14%)
C-3	53373718	40,733,492 (76 32%)	30,245,450 (56.67%)	10,488,042 (19.65%)	18,789,614 (35.20%)	19,563,095 (36.65%)
T-1	51735552	40,701,500 (78.67%)	30,288,027 (58.54%)	10,413,473 (20.13%)	18,856,174 (36.45%)	19,585,992 (37.86%)
T-2	59531420	43,792,682 (73.56%)	32,421,621 (54.46%)	11,371,061 (19.10%)	20,246,420 (34.01%)	21,049,529 (35.36%)
T-3	47968342	37,659,261 (78.51%)	27,698,420 (57.74%)	9,960,841 (20.77%)	17,392,636 (36.26%)	18,066,118 (37.66%)
