# Supplementary material
Source: MDPI journal article supplement (https://www.mdpi.com/2311-7524/9/4/428)
Supplement: s1 [file s1 › Table S4 All of the different expression genes.xlsx]

## Sheet: List of differential genes
Table S4 All of the different expression genes
#ID	gene_name	C-1_FPKM	C-1_count	C-2_FPKM	C-2_count	C-3_FPKM	C-3_count	T-1_FPKM	T-1_count	T-2_FPKM	T-2_count	T-3_FPKM	T-3_count	FDR	log2FC	regulated	COG_class	COG_class_annotation	GO_annotation	KEGG_annotation	KEGG_pathway_annotation	KOG_class	KOG_class_annotation	Pfam_annotation	Swiss_Prot_annotation	eggNOG_class	eggNOG_class_annotation	NR_annotation	GO_second_level_annotation
Chrysanthemum_x_morifolium_newGene_2072	--	3.26182	56	2.55821	51	4.27495	67	1.47081	24	1.49593	26	0.763888	12	0.0362381	-0.93327	down	--	--	--	--	--	--	--	--	--	--	--	--	--
evm.TU.scaffold_1330.45	evm.TU.scaffold_1330.45	8.91813	227	8.22396	242	10.6165	248	3.83322	91	5.30702	135	3.39929	75	0.000339481	-0.985707	down	[I]	Lipid transport and metabolism	Biological Process: response to reactive oxygen species (GO:0000302);; Molecular Function: molecular_function (GO:0003674);; Molecular Function: catalytic activity (GO:0003824);; Molecular Function: 2-acylglycerol O-acyltransferase activity (GO:0003846);; Molecular Function: phospholipase activity (GO:0004620);; Molecular Function: lysophospholipase activity (GO:0004622);; Cellular Component: cel…	--	--	[I]	Lipid transport and metabolism	Serine aminopeptidase, S33	Caffeoylshikimate esterase OS=Arabidopsis thaliana OX=3702 GN=CSE PE=1 SV=1	--	--	hypothetical protein CTI12_AA569170 [Artemisia annua]	biological process: response to stimulus (GO:0050896);; molecular function: catalytic activity (GO:0003824);; cellular component: cell (GO:0005623);; cellular component: cell part (GO:0044464);; cellular component: organelle (GO:0043226);; cellular component: membrane (GO:0016020);; cellular component: cell junction (GO:0030054);; biological process: metabolic process (GO:0008152);; biological pr…
evm.TU.scaffold_10014.52	evm.TU.scaffold_10014.52	18.5231	545	16.4108	559	17.5256	474	13.3131	363	9.24219	271	10.8714	275	0.0116465	-0.605498	down	--	--	--	--	--	--	--	Neprosin	--	--	--	hypothetical protein LSAT_4X5001 [Lactuca sativa]	--
evm.TU.scaffold_1806.598	evm.TU.scaffold_1806.598	7.7165	150	10.5535	238	8.70236	156	3.02895	55	2.69773	53	3.69184	62	1.53e-06	-1.2912	down	--	--	Biological Process: phosphorelay signal transduction system (GO:0000160);; Biological Process: response to acid chemical (GO:0001101);; Biological Process: activation of innate immune response (GO:0002218);; Biological Process: immune effector process (GO:0002252);; Biological Process: activation of immune response (GO:0002253);; Biological Process: immune system process (GO:0002376);; Biological…	--	--	--	--	AP2 domain	Ethylene-responsive transcription factor 4 OS=Arabidopsis thaliana OX=3702 GN=ERF4 PE=1 SV=1	--	--	unnamed protein product [Lactuca saligna]	biological process: cellular process (GO:0009987);; biological process: signaling (GO:0023052);; biological process: single-organism process (GO:0044699);; biological process: response to stimulus (GO:0050896);; biological process: biological regulation (GO:0065007);; biological process: immune system process (GO:0002376);; molecular function: binding (GO:0005488);; molecular function: nucleic ac…
evm.TU.scaffold_1180.177	evm.TU.scaffold_1180.177	30.0346	924	28.5555	1017	29.6041	837	44.1438	1258	47.2661	1447	47.9644	1268	2.43e-06	0.633781	up	[E]	Amino acid transport and metabolism	Molecular Function: argininosuccinate synthase activity (GO:0004055);; Molecular Function: ATP binding (GO:0005524);; Biological Process: arginine biosynthetic process (GO:0006526);;	--	--	[E]	Amino acid transport and metabolism	Arginosuccinate synthase	Argininosuccinate synthase, chloroplastic OS=Arabidopsis thaliana OX=3702 GN=At4g24830 PE=1 SV=3	--	--	arginosuccinate synthase family [Artemisia annua]	molecular function: catalytic activity (GO:0003824);; molecular function: binding (GO:0005488);; biological process: metabolic process (GO:0008152);; biological process: cellular process (GO:0009987);; biological process: single-organism process (GO:0044699)
evm.TU.scaffold_8920.109	evm.TU.scaffold_8920.109	79.2051	1236	55.6438	1005	48.8423	701	36.4471	527	19.5803	304	33.9355	456	0.00409231	-0.885075	down	--	--	--	--	--	--	--	--	--	--	--	hypothetical protein CTI12_AA498890 [Artemisia annua]	--
evm.TU.scaffold_800.189	evm.TU.scaffold_800.189	5.81065	205	4.74727	194	5.21806	170	3.12601	103	3.38843	119	2.80809	86	0.020162	-0.672861	down	--	--	Cellular Component: Golgi membrane (GO:0000139);; Biological Process: protein glycosylation (GO:0006486);; Cellular Component: integral component of membrane (GO:0016021);; Molecular Function: transferase activity, transferring glycosyl groups (GO:0016757);;	--	--	[G]	Carbohydrate transport and metabolism	Galactosyltransferase	Probable beta-1,3-galactosyltransferase 2 OS=Arabidopsis thaliana OX=3702 GN=B3GALT2 PE=2 SV=1	--	--	galactosyltransferase family protein [Artemisia annua]	cellular component: cell (GO:0005623);; cellular component: membrane (GO:0016020);; cellular component: organelle (GO:0043226);; cellular component: organelle part (GO:0044422);; cellular component: cell part (GO:0044464);; biological process: metabolic process (GO:0008152);; biological process: cellular process (GO:0009987);; biological process: single-organism process (GO:0044699);; cellular co…
evm.TU.scaffold_asm7_new.509	evm.TU.scaffold_asm7_new.509	7.82337	103	6.77033	104	8.92171	108	13.4449	164	13.1478	173	11.5729	131	0.048993	0.615683	up	--	--	Molecular Function: nucleic acid binding (GO:0003676);; Biological Process: gene silencing by RNA (GO:0031047);;	--	--	[J]	Translation, ribosomal structure and biogenesis	N-terminal domain of argonaute	Protein argonaute 4 OS=Arabidopsis thaliana OX=3702 GN=AGO4 PE=1 SV=2	--	--	argonaute family protein [Artemisia annua]	molecular function: binding (GO:0005488);; biological process: cellular process (GO:0009987);; biological process: single-organism process (GO:0044699);; biological process: biological regulation (GO:0065007)
evm.TU.scaffold_599.108	evm.TU.scaffold_599.108	6.76593	153	6.49601	170	7.70831	161	4.5107	95	3.77631	85	3.66339	72	0.0172382	-0.710662	down	[R]	General function prediction only	Biological Process: nitrogen compound metabolic process (GO:0006807);; Molecular Function: transferase activity, transferring acyl groups (GO:0016746);;	--	--	[E]	Amino acid transport and metabolism	Carbon-nitrogen hydrolase	Omega-amidase, chloroplastic OS=Arabidopsis thaliana OX=3702 GN=NLP3 PE=1 SV=1	--	--	nitrilase/cyanide hydratase and apolipoprotein N-acyltransferase family protein [Artemisia annua]	biological process: metabolic process (GO:0008152);; molecular function: catalytic activity (GO:0003824)
evm.TU.scaffold_970.86	evm.TU.scaffold_970.86	29.524	1043	26.5277	1086	24.7378	804	79.8208	2613	30.5008	1073	48.3424	1469	0.0183787	0.804776	up	[F]	Nucleotide transport and metabolism	Molecular Function: ATP binding (GO:0005524);; Biological Process: carbohydrate metabolic process (GO:0005975);; Molecular Function: phosphoribulokinase activity (GO:0008974);;	--	--	[TZ]	Signal transduction mechanisms;; Cytoskeleton	Phosphoribulokinase / Uridine kinase family	Phosphoribulokinase, chloroplastic OS=Arabidopsis thaliana OX=3702 GN=At1g32060 PE=1 SV=1	--	--	phosphoribulokinase protein [Artemisia annua]	molecular function: binding (GO:0005488);; biological process: metabolic process (GO:0008152);; molecular function: catalytic activity (GO:0003824);; biological process: cellular process (GO:0009987)
evm.TU.scaffold_10264.288	evm.TU.scaffold_10264.288	0	0	0	0	0	0	3.77256	35	6.41626	64	6.11512	53	6.97e-13	2.51869	up	--	--	--	--	--	[R]	General function prediction only	Protein of unknown function (DUF1685)	--	--	--	hypothetical protein CTI12_AA212920 [Artemisia annua]	--
Chrysanthemum_x_morifolium_newGene_45633	--	0.891448	31	0.851051	35	0.582698	20	4.11791	134	3.86927	135	4.68793	140	4e-13	1.95741	up	[QV]	Secondary metabolites biosynthesis, transport and catabolism;; Defense mechanisms	Cellular Component: membrane (GO:0016020);; Molecular Function: oxidoreductase activity (GO:0016491);; Molecular Function: metal ion binding (GO:0046872);;	--	--	[QI]	Secondary metabolites biosynthesis, transport and catabolism;; Lipid transport and metabolism	--	Alkane hydroxylase MAH1 OS=Arabidopsis thaliana OX=3702 GN=CYP96A15 PE=2 SV=1	Q	Secondary metabolites biosynthesis, transport and catabolism	cytochrome P450 [Cynara cardunculus var. scolymus]	cellular component: membrane (GO:0016020);; molecular function: catalytic activity (GO:0003824);; molecular function: binding (GO:0005488)
evm.TU.scaffold_6371.137	evm.TU.scaffold_6371.137	2.74146	75	3.72777	117	2.96855	74	7.12416	179	5.55801	150	6.01281	141	0.00362603	0.847832	up	--	--	Biological Process: cytidine to uridine editing (GO:0016554);;	--	--	--	--	--	Multiple organellar RNA editing factor 9, chloroplastic OS=Arabidopsis thaliana OX=3702 GN=MORF9 PE=1 SV=1	--	--	hypothetical protein CTI12_AA173280 [Artemisia annua]	biological process: metabolic process (GO:0008152);; biological process: cellular process (GO:0009987)
evm.TU.scaffold_4117.2	evm.TU.scaffold_4117.2	0.196136	7	0.420937	16	0.243506	8	1.28347	39	0.839947	28	1.2551	35	0.0149007	1.08896	up	[IQ]	Lipid transport and metabolism;; Secondary metabolites biosynthesis, transport and catabolism	Biological Process: fatty acid biosynthetic process (GO:0006633);; Molecular Function: transferase activity, transferring acyl groups other than amino-acyl groups (GO:0016747);;	--	--	[IQ]	Lipid transport and metabolism;; Secondary metabolites biosynthesis, transport and catabolism	Beta-ketoacyl synthase, N-terminal domain	3-oxoacyl-[acyl-carrier-protein] synthase I, chloroplastic OS=Arabidopsis thaliana OX=3702 GN=KAS1 PE=1 SV=2	--	--	3-oxoacyl-[acyl-carrier-protein] synthase 2 [Artemisia annua]	biological process: metabolic process (GO:0008152);; biological process: cellular process (GO:0009987);; biological process: single-organism process (GO:0044699);; molecular function: catalytic activity (GO:0003824)
evm.TU.scaffold_11455.2	evm.TU.scaffold_11455.2	15.9394	282	17.0548	350	19.7874	322	8.92291	147	12.2339	216	10.0207	153	0.0070337	-0.686703	down	--	--	Biological Process: lipid transport (GO:0006869);; Molecular Function: lipid binding (GO:0008289);; Cellular Component: integral component of membrane (GO:0016021);;	--	--	--	--	Probable lipid transfer	--	--	--	hypothetical protein CTI12_AA099250 [Artemisia annua]	biological process: single-organism process (GO:0044699);; biological process: localization (GO:0051179);; molecular function: binding (GO:0005488);; cellular component: membrane (GO:0016020);; cellular component: membrane part (GO:0044425)
Chrysanthemum_x_morifolium_newGene_9302	--	21.062	203	22.5657	252	19.0668	169	11.9473	107	11.0459	106	10.9751	91	0.00156226	-0.800277	down	--	--	--	--	--	--	--	--	--	--	--	--	--
evm.TU.scaffold_1548.88	evm.TU.scaffold_1548.88	7.2619	255	7.39688	301	12.9611	419	4.44995	145	5.47361	192	5.79807	176	0.0492989	-0.686024	down	[R]	General function prediction only	Molecular Function: acid phosphatase activity (GO:0003993);;	--	--	--	--	HAD superfamily, subfamily IIIB (Acid phosphatase)	Acid phosphatase 1 OS=Solanum lycopersicum OX=4081 GN=APS1 PE=2 SV=1	--	--	acid phosphatase, class B-like protein [Artemisia annua]	molecular function: catalytic activity (GO:0003824);; biological process: metabolic process (GO:0008152);; biological process: cellular process (GO:0009987)
evm.TU.scaffold_1506.189	evm.TU.scaffold_1506.189	2.21223	52	1.74877	47	1.55494	34	4.48704	97	4.66908	108	4.12626	83	0.00196253	1.01772	up	--	--	--	--	--	--	--	--	--	--	--	hypothetical protein CTI12_AA000660 [Artemisia annua]	--
evm.TU.scaffold_1604.22	evm.TU.scaffold_1604.22	121.919	2346	134.684	3001	143.322	2536	85.6716	1527	99.2264	1901	68.4902	1133	0.00169895	-0.622878	down	--	--	Molecular Function: protein phosphatase inhibitor activity (GO:0004864);; Biological Process: defense response (GO:0006952);; Biological Process: abscisic acid-activated signaling pathway (GO:0009738);; Molecular Function: abscisic acid binding (GO:0010427);; Molecular Function: signaling receptor activity (GO:0038023);;	--	--	--	--	Pathogenesis-related protein Bet v 1 family	Major allergen Pru ar 1 OS=Prunus armeniaca OX=36596 PE=1 SV=1	--	--	major allergen Pyr c 1 [Artemisia annua]	molecular function: molecular function regulator (GO:0098772);; biological process: biological regulation (GO:0065007);; biological process: response to stimulus (GO:0050896);; biological process: cellular process (GO:0009987);; biological process: signaling (GO:0023052);; biological process: single-organism process (GO:0044699);; molecular function: binding (GO:0005488);; molecular function: sig…
evm.TU.scaffold_10441.6	evm.TU.scaffold_10441.6	17.3257	591	11.1326	440	23.6072	740	3.88912	123	3.218	110	3.77385	111	6.56e-14	-1.90185	down	--	--	Biological Process: defense response (GO:0006952);; Biological Process: negative regulation of translation (GO:0017148);; Molecular Function: rRNA N-glycosylase activity (GO:0030598);; Molecular Function: toxin activity (GO:0090729);;	--	--	--	--	Ricin-type beta-trefoil lectin domain	Ribosome-inactivating protein PMRIPt OS=Polygonatum multiflorum OX=45371 GN=RIPt PE=1 SV=1	--	--	hypothetical protein E3N88_15580 [Mikania micrantha]	biological process: response to stimulus (GO:0050896);; biological process: biological regulation (GO:0065007);; molecular function: catalytic activity (GO:0003824);; molecular function: toxin activity (GO:0090729)
evm.TU.scaffold_9749.31	evm.TU.scaffold_9749.31	2.49496	81	3.07126	115	2.91974	87	0.996705	30	0.948806	31	1.10779	31	0.000271775	-1.17622	down	[T]	Signal transduction mechanisms	Molecular Function: protein serine/threonine phosphatase activity (GO:0004722);; Molecular Function: metal ion binding (GO:0046872);;	--	--	[T]	Signal transduction mechanisms	Protein phosphatase 2C	Protein phosphatase 2C 3 OS=Arabidopsis thaliana OX=3702 GN=AIP1 PE=1 SV=1	--	--	Protein phosphatase 2C [Artemisia annua]	molecular function: catalytic activity (GO:0003824);; biological process: metabolic process (GO:0008152);; biological process: cellular process (GO:0009987);; molecular function: binding (GO:0005488)
Chrysanthemum_x_morifolium_newGene_92310	--	3.11255	57	2.25163	52	2.84627	49	0.555239	10	0.809572	16	1.10906	21	0.0145846	-1.05013	down	--	--	--	--	--	--	--	--	--	--	--	--	--
Chrysanthemum_x_morifolium_newGene_77043	--	2.16327	76	1.37575	56	0.45775	15	0.306908	10	0.336189	12	0.355766	11	0.0370907	-0.99571	down	[K]	Transcription	Cellular Component: membrane (GO:0016020);;	--	--	[R]	General function prediction only	Leucine rich repeat;; Leucine Rich repeats (2 copies);; Leucine Rich Repeat;; Leucine Rich repeat	Receptor-like protein Cf-9 homolog OS=Solanum lycopersicum OX=4081 GN=HCR9-0 PE=2 SV=2	S	Function unknown	receptor-like protein 12 [Lactuca sativa]	cellular component: membrane (GO:0016020)
Chrysanthemum_x_morifolium_newGene_3123	--	71.8856	849	78.7137	1078	83.9197	913	32.1874	354	50.7368	598	47.0456	479	0.000585343	-0.780674	down	--	--	Cellular Component: extracellular region (GO:0005576);; Cellular Component: cell wall (GO:0005618);; Biological Process: killing of cells of other organism (GO:0031640);; Biological Process: defense response to fungus (GO:0050832);;	--	--	--	--	--	Defensin SD2 OS=Helianthus annuus OX=4232 GN=SD2 PE=2 SV=1	S	Function unknown	defensin SD2 [Helianthus annuus]	cellular component: extracellular region (GO:0005576);; cellular component: cell (GO:0005623);; cellular component: cell part (GO:0044464);; biological process: cell killing (GO:0001906);; biological process: multi-organism process (GO:0051704);; biological process: response to stimulus (GO:0050896)
Chrysanthemum_x_morifolium_newGene_68088	--	21.7528	230	8.39704	103	4.29747	42	3.01405	30	4.28128	45	2.17552	20	0.0223726	-1.04928	down	--	--	--	--	--	--	--	--	--	--	--	hypothetical protein LSAT_2X106580 [Lactuca sativa]	--
evm.TU.scaffold_8085.226	evm.TU.scaffold_8085.226	2.55336	48	1.94558	43	2.40162	42	7.53365	131	7.72752	144	6.09428	99	2.31e-06	1.34294	up	--	--	Molecular Function: peroxidase activity (GO:0004601);; Cellular Component: extracellular region (GO:0005576);; Biological Process: response to oxidative stress (GO:0006979);; Molecular Function: heme binding (GO:0020037);; Biological Process: hydrogen peroxide catabolic process (GO:0042744);; Molecular Function: metal ion binding (GO:0046872);;	--	--	--	--	Peroxidase	Peroxidase 52 OS=Arabidopsis thaliana OX=3702 GN=PER52 PE=2 SV=1	--	--	peroxidase 4 [Artemisia annua]	molecular function: catalytic activity (GO:0003824);; molecular function: antioxidant activity (GO:0016209);; biological process: metabolic process (GO:0008152);; biological process: cellular process (GO:0009987);; biological process: single-organism process (GO:0044699);; biological process: response to stimulus (GO:0050896);; biological process: detoxification (GO:0098754);; cellular component:…
Chrysanthemum_x_morifolium_newGene_92961	--	14.1279	288	12.6936	299	14.2265	265	2.98962	62	2.36233	51	2.35544	42	6.8e-21	-2.04721	down	--	--	Molecular Function: nucleotide binding (GO:0000166);;	K10583|5.7594e-63|sind:105155779|K10583 ubiquitin-conjugating enzyme E2 S [EC:2.3.2.23] | (RefSeq) ubiquitin-conjugating enzyme E2 22	Ubiquitin mediated proteolysis (ko04120)	[O]	Posttranslational modification, protein turnover, chaperones	Ubiquitin-conjugating enzyme	Ubiquitin-conjugating enzyme E2 22 OS=Arabidopsis thaliana OX=3702 GN=UBC22 PE=1 SV=1	O	Posttranslational modification, protein turnover, chaperones	ubiquitin-conjugating enzyme E2 22-like [Helianthus annuus]	molecular function: binding (GO:0005488)
evm.TU.scaffold_1007.133	evm.TU.scaffold_1007.133	1.30757	83	1.52192	112	1.79121	105	3.17748	187	3.09115	195	2.73115	149	0.00151248	0.848111	up	[H]	Coenzyme transport and metabolism	Molecular Function: oxygen-dependent protoporphyrinogen oxidase activity (GO:0004729);; Biological Process: porphyrin-containing compound biosynthetic process (GO:0006779);; Cellular Component: integral component of membrane (GO:0016021);; Molecular Function: palmitoyltransferase activity (GO:0016409);;	--	--	[H]	Coenzyme transport and metabolism	Flavin containing amine oxidoreductase	Protoporphyrinogen oxidase 1, chloroplastic OS=Arabidopsis thaliana OX=3702 GN=PPOX1 PE=1 SV=1	--	--	plastid protoporphyrinogen IX oxidase [Artemisia annua]	molecular function: catalytic activity (GO:0003824);; biological process: metabolic process (GO:0008152);; biological process: single-organism process (GO:0044699);; biological process: cellular process (GO:0009987);; cellular component: membrane (GO:0016020);; cellular component: membrane part (GO:0044425)
evm.TU.scaffold_1619.196	evm.TU.scaffold_1619.196	57.9929	849	61.5316	1043	57.3068	771	39.7083	539	40.2436	587	30.8862	389	0.000694228	-0.63966	down	[Q]	Secondary metabolites biosynthesis, transport and catabolism	Molecular Function: hydrolase activity (GO:0016787);;	--	--	[R]	General function prediction only	Dienelactone hydrolase family	Endo-1,3;1,4-beta-D-glucanase OS=Zea mays OX=4577 PE=1 SV=1	--	--	alpha/Beta hydrolase fold protein [Artemisia annua]	molecular function: catalytic activity (GO:0003824)
evm.TU.scaffold_870.110	evm.TU.scaffold_870.110	0.563172	29	0.762267	45	0.766036	36	1.55816	73	1.21935	62	1.85627	81	0.0281889	0.867954	up	--	--	Molecular Function: methyltransferase activity (GO:0008168);; Cellular Component: integral component of membrane (GO:0016021);; Biological Process: methylation (GO:0032259);;	--	--	--	--	Putative S-adenosyl-L-methionine-dependent methyltransferase	Probable methyltransferase PMT26 OS=Arabidopsis thaliana OX=3702 GN=At5g64030 PE=2 SV=1	--	--	ankyrin-like protein [Artemisia annua]	molecular function: catalytic activity (GO:0003824);; cellular component: membrane (GO:0016020);; cellular component: membrane part (GO:0044425);; biological process: metabolic process (GO:0008152)
evm.TU.scaffold_1046.437	evm.TU.scaffold_1046.437	2.78112	85	2.64183	94	2.32257	65	4.07725	115	4.88362	148	4.48536	118	0.0360304	0.679787	up	--	--	Biological Process: Group II intron splicing (GO:0000373);; Biological Process: RNA splicing, via transesterification reactions (GO:0000375);; Biological Process: RNA splicing, via transesterification reactions with bulged adenosine as nucleophile (GO:0000377);; Molecular Function: molecular_function (GO:0003674);; Molecular Function: nucleic acid binding (GO:0003676);; Molecular Function: RNA bi…	--	--	--	--	Plant organelle RNA recognition domain	Protein WHAT'S THIS FACTOR 1 homolog, chloroplastic OS=Arabidopsis thaliana OX=3702 GN=At4g01037 PE=3 SV=1	--	--	unnamed protein product [Lactuca saligna]	biological process: metabolic process (GO:0008152);; biological process: cellular process (GO:0009987);; molecular function: binding (GO:0005488);; cellular component: cell (GO:0005623);; cellular component: cell part (GO:0044464);; cellular component: organelle (GO:0043226)
Chrysanthemum_x_morifolium_newGene_53170	--	3.6463	38	10.3531	125	9.84892	95	2.9751	29	2.75014	29	0.990235	9	0.0183712	-1.06197	down	--	--	Cellular Component: integral component of membrane (GO:0016021);;	--	--	[S]	Function unknown	--	--	S	Function unknown	transmembrane protein 230-like [Helianthus annuus]	cellular component: membrane (GO:0016020);; cellular component: membrane part (GO:0044425)
evm.TU.scaffold_1831.12	evm.TU.scaffold_1831.12	18.8191	354	30.7795	669	25.7088	444	52.0552	905	57.3354	1071	49.2099	795	2.44e-06	0.983393	up	--	--	Molecular Function: endopeptidase inhibitor activity (GO:0004866);;	--	--	--	--	Trypsin and protease inhibitor	--	--	--	proteinase inhibitor I3 [Artemisia annua]	molecular function: molecular function regulator (GO:0098772);; biological process: biological regulation (GO:0065007)
evm.TU.scaffold_7918.30	evm.TU.scaffold_7918.30	0.126997	3	1.84875	49	0.264446	6	3.41981	72	4.26959	97	4.44919	87	0.0231261	1.05121	up	[GI]	Carbohydrate transport and metabolism;; Lipid transport and metabolism	Molecular Function: lyase activity (GO:0016829);; Molecular Function: pectinesterase activity (GO:0030599);; Biological Process: cell wall modification (GO:0042545);; Molecular Function: aspartyl esterase activity (GO:0045330);; Biological Process: pectin catabolic process (GO:0045490);;	--	--	--	--	Pectinesterase	Probable pectinesterase 68 OS=Arabidopsis thaliana OX=3702 GN=PME68 PE=2 SV=1	--	--	pectin lyase-like superfamily protein [Artemisia annua]	molecular function: catalytic activity (GO:0003824);; biological process: cellular process (GO:0009987);; biological process: cellular component organization or biogenesis (GO:0071840);; biological process: metabolic process (GO:0008152)
Chrysanthemum_x_morifolium_newGene_23176	--	7.89371	93	7.56094	103	10.8846	118	1.0949	12	1.06856	13	3.49634	36	0.0003157	-1.40008	down	--	--	--	--	--	--	--	--	--	--	--	calcium-binding mitochondrial carrier protein SCaMC-1-like [Helianthus annuus]	--
evm.TU.scaffold_1749.441	evm.TU.scaffold_1749.441	6.32096	237	6.06677	263	5.54433	191	14.6595	508	8.85448	330	8.49961	274	0.0198198	0.720381	up	--	--	Biological Process: response to reactive oxygen species (GO:0000302);; Biological Process: response to acid chemical (GO:0001101);; Biological Process: response to stress (GO:0006950);; Biological Process: response to oxidative stress (GO:0006979);; Biological Process: biological_process (GO:0008150);; Biological Process: response to radiation (GO:0009314);; Biological Process: response to UV (GO…	--	--	--	--	Protein of unknown function (DUF760)	UV-B-induced protein At3g17800, chloroplastic OS=Arabidopsis thaliana OX=3702 GN=At3g17800 PE=2 SV=1	--	--	hypothetical protein CTI12_AA008230 [Artemisia annua]	biological process: response to stimulus (GO:0050896)
Chrysanthemum_x_morifolium_newGene_79287	--	10.7686	353	9.43757	368	9.25839	261	7.33902	182	6.4807	175	7.86256	205	0.0317294	-0.592463	down	--	--	Molecular Function: nucleotide binding (GO:0000166);; Cellular Component: cytoskeleton (GO:0005856);; Biological Process: RNA processing (GO:0006396);;	K07375|4.49167e-38|jcu:105650562|K07375 tubulin beta | (RefSeq) tubulin beta-1 chain-like	Phagosome (ko04145)	[Z]	Cytoskeleton	--	Tubulin beta-1 chain (Fragment) OS=Avena sativa OX=4498 GN=TUBB1 PE=2 SV=1	Z	Cytoskeleton	PREDICTED: tubulin beta-1 chain-like, partial [Nicotiana tabacum]	molecular function: binding (GO:0005488);; cellular component: cell (GO:0005623);; cellular component: organelle (GO:0043226);; cellular component: cell part (GO:0044464);; biological process: metabolic process (GO:0008152);; biological process: cellular process (GO:0009987)
evm.TU.scaffold_643.26	evm.TU.scaffold_643.26	2.4257	47	1.99529	45	1.86106	33	4.93831	88	6.23151	120	4.74294	79	0.00125071	1.06953	up	--	--	Biological Process: regulation of transcription, DNA-templated (GO:0006355);; Molecular Function: protein dimerization activity (GO:0046983);;	--	--	--	--	Helix-loop-helix DNA-binding domain	Transcription factor bHLH137 OS=Arabidopsis thaliana OX=3702 GN=BHLH137 PE=1 SV=1	--	--	transcription factor bHLH137 isoform X1 [Cynara cardunculus var. scolymus]	biological process: biological regulation (GO:0065007);; molecular function: binding (GO:0005488)
evm.TU.scaffold_533.53	evm.TU.scaffold_533.53	2.86396	131	2.1862	116	2.69653	114	1.72537	73	1.20524	55	1.0664	42	0.0345313	-0.782205	down	--	--	Molecular Function: calcium ion binding (GO:0005509);; Cellular Component: integral component of membrane (GO:0016021);; Biological Process: transmembrane transport (GO:0055085);;	--	--	--	--	Sodium/calcium exchanger protein	Sodium/calcium exchanger NCL OS=Arabidopsis thaliana OX=3702 GN=NCL PE=2 SV=1	--	--	calcium-binding EF-hand family protein [Artemisia annua]	molecular function: binding (GO:0005488);; cellular component: membrane (GO:0016020);; cellular component: membrane part (GO:0044425);; biological process: localization (GO:0051179)
evm.TU.scaffold_1679.308	evm.TU.scaffold_1679.308	20.8729	536	23.5986	702	19.1015	452	38.5239	917	32.9308	842	34.2218	756	9.17e-05	0.688156	up	[J]	Translation, ribosomal structure and biogenesis	Molecular Function: nucleic acid binding (GO:0003676);;	--	--	--	--	S1 RNA binding domain	30S ribosomal protein S1, chloroplastic OS=Spinacia oleracea OX=3562 GN=RPS1 PE=1 SV=1	--	--	30S ribosomal protein S1, chloroplastic-like [Lactuca sativa]	molecular function: binding (GO:0005488)
evm.TU.scaffold_3007.56	evm.TU.scaffold_3007.56	61.2618	537	76.9747	782	59.3018	479	99.8008	811	99.1541	866	120.952	912	0.00176465	0.644892	up	[O]	Posttranslational modification, protein turnover, chaperones	Biological Process: protein folding (GO:0006457);;	--	--	[O]	Posttranslational modification, protein turnover, chaperones	Chaperonin 10 Kd subunit	10 kDa chaperonin 1, chloroplastic OS=Arabidopsis thaliana OX=3702 GN=CPN10-1 PE=2 SV=1	--	--	Chaperonin Cpn10 [Artemisia annua]	biological process: cellular process (GO:0009987)
evm.TU.scaffold_2426.22	evm.TU.scaffold_2426.22	4.6556	129	5.2477	168	4.26182	109	10.1167	259	8.85978	244	6.84493	163	0.00751935	0.756818	up	[H]	Coenzyme transport and metabolism	Molecular Function: O-methyltransferase activity (GO:0008171);; Biological Process: methylation (GO:0032259);; Molecular Function: protein dimerization activity (GO:0046983);;	--	--	[R]	General function prediction only	O-methyltransferase domain	Caffeic acid 3-O-methyltransferase OS=Zinnia violacea OX=34245 PE=2 SV=1	--	--	caffeic acid 3-O-methyltransferase [Artemisia annua]	molecular function: catalytic activity (GO:0003824);; biological process: metabolic process (GO:0008152);; molecular function: binding (GO:0005488)
Chrysanthemum_x_morifolium_newGene_34875	--	1.70477	27	0.967379	17	1.56102	23	4.1937	68	6.40655	106	5.96599	90	7.45e-06	1.52562	up	[L]	Replication, recombination and repair	Molecular Function: RNA binding (GO:0003723);; Molecular Function: helicase activity (GO:0004386);; Molecular Function: ATP binding (GO:0005524);;	K13179|3.86242e-84|sind:105164333|K13179 ATP-dependent RNA helicase DDX18/HAS1 [EC:3.6.4.13] | (RefSeq) DEAD-box ATP-dependent RNA helicase 51-like	--	[A]	RNA processing and modification	DEAD/DEAH box helicase	DEAD-box ATP-dependent RNA helicase 27 OS=Oryza sativa subsp. japonica OX=39947 GN=Os03g0802700 PE=3 SV=1	L	Replication, recombination and repair	DEAD-box ATP-dependent RNA helicase 51 [Sesamum indicum]	molecular function: binding (GO:0005488);; molecular function: catalytic activity (GO:0003824)
evm.TU.scaffold_423.196	evm.TU.scaffold_423.196	7.27249	167	6.07469	162	6.46939	137	10.8372	231	10.8983	250	9.74047	193	0.0202319	0.606107	up	[GHR]	Carbohydrate transport and metabolism;; Coenzyme transport and metabolism;; General function prediction only	Molecular Function: magnesium ion binding (GO:0000287);; Molecular Function: catalytic activity (GO:0003824);; Molecular Function: thiamine pyrophosphate binding (GO:0030976);;	--	--	[EH]	Amino acid transport and metabolism;; Coenzyme transport and metabolism	Thiamine pyrophosphate enzyme, central domain	Pyruvate decarboxylase 2 (Fragment) OS=Pisum sativum OX=3888 GN=PDC2 PE=2 SV=1	--	--	pyruvate decarboxylase [Artemisia annua]	molecular function: binding (GO:0005488);; molecular function: catalytic activity (GO:0003824)
evm.TU.scaffold_2912.122	evm.TU.scaffold_2912.122	0	0	0.182595	8	0	0	1.64402	51	1.32489	44	2.24227	64	2.79e-06	1.7848	up	--	--	Molecular Function: iron ion binding (GO:0005506);; Biological Process: lipid biosynthetic process (GO:0008610);; Cellular Component: integral component of membrane (GO:0016021);; Molecular Function: oxidoreductase activity (GO:0016491);;	--	--	--	--	WAX2 C-terminal domain	Very-long-chain aldehyde decarbonylase CER3 OS=Arabidopsis thaliana OX=3702 GN=CER3 PE=1 SV=1	--	--	fatty acid hydroxylase, NAD(P)-binding domain, Uncharacterized domain Wax2 [Artemisia annua]	molecular function: binding (GO:0005488);; biological process: metabolic process (GO:0008152);; biological process: single-organism process (GO:0044699);; cellular component: membrane (GO:0016020);; cellular component: membrane part (GO:0044425);; molecular function: catalytic activity (GO:0003824)
evm.TU.scaffold_1473.160	evm.TU.scaffold_1473.160	0.37128	9	0.592971	16	0.729821	15	1.7144	36	1.65138	37	1.73608	34	0.0303525	0.983064	up	--	--	--	--	--	[R]	General function prediction only	Pentacotripeptide-repeat region of PRORP	Proteinaceous RNase P 1, chloroplastic/mitochondrial OS=Arabidopsis thaliana OX=3702 GN=PRORP1 PE=1 SV=1	--	--	Pentatricopeptide repeat-containing protein [Artemisia annua]	--
evm.TU.scaffold_1251.110	evm.TU.scaffold_1251.110	3.05412	221	4.25424	357	4.26406	284	2.45137	165	2.10947	152	1.94791	122	0.00530672	-0.742426	down	--		Molecular Function: protein kinase activity (GO:0004672);; Molecular Function: ATP binding (GO:0005524);; Cellular Component: integral component of membrane (GO:0016021);;	--	--	--	--	Protein tyrosine and serine/threonine kinase	Leucine-rich repeat receptor-like serine/threonine-protein kinase BAM1 OS=Arabidopsis thaliana OX=3702 GN=BAM1 PE=1 SV=1	--	--	Leucine-rich repeat-containing protein [Artemisia annua]	molecular function: catalytic activity (GO:0003824);; biological process: metabolic process (GO:0008152);; biological process: cellular process (GO:0009987);; molecular function: binding (GO:0005488);; cellular component: membrane (GO:0016020);; cellular component: membrane part (GO:0044425)
evm.TU.scaffold_4741.62	evm.TU.scaffold_4741.62	6.3175	317	7.41689	431	6.62644	306	10.1274	471	12.8939	644	11.0564	477	0.000576128	0.691051	up	[O]	Posttranslational modification, protein turnover, chaperones	Molecular Function: ATP binding (GO:0005524);; Biological Process: protein folding (GO:0006457);; Molecular Function: unfolded protein binding (GO:0051082);;	--	--	[O]	Posttranslational modification, protein turnover, chaperones	Hsp70 protein	Heat shock 70 kDa protein, mitochondrial OS=Phaseolus vulgaris OX=3885 PE=2 SV=1	--	--	unnamed protein product [Lactuca saligna]	molecular function: binding (GO:0005488);; biological process: cellular process (GO:0009987)
evm.TU.scaffold_1461.12	evm.TU.scaffold_1461.12	21.5969	733	18.3692	722	20.3064	634	5.74513	181	9.32229	315	5.14289	151	5.16e-09	-1.38612	down	--	--	Molecular Function: transferase activity, transferring acyl groups other than amino-acyl groups (GO:0016747);;	--	--	--	--	Transferase family	Omega-hydroxypalmitate O-feruloyl transferase OS=Arabidopsis thaliana OX=3702 GN=HHT1 PE=1 SV=1	--	--	Chloramphenicol acetyltransferase-like domain-containing protein [Artemisia annua]	molecular function: catalytic activity (GO:0003824)
evm.TU.scaffold_8085.243	evm.TU.scaffold_8085.243	131.538	2255	145.485	2888	184.053	2902	79.0646	1256	106.133	1811	93.0534	1372	0.000942616	-0.682193	down	--	--	Molecular Function: intramolecular lyase activity (GO:0016872);;	--	--	--	--	Chalcone-flavanone isomerase	Probable chalcone--flavonone isomerase 3 OS=Arabidopsis thaliana OX=3702 GN=CHI3 PE=1 SV=1	--	--	enhancer of flavonoid production [Chrysanthemum seticuspe]	molecular function: catalytic activity (GO:0003824)
evm.TU.scaffold_asm20_new.1218	evm.TU.scaffold_asm20_new.1218	6.77865	333	7.61292	433	7.33333	331	12.4387	565	11.0467	539	11.8452	500	0.000109948	0.660673	up	--	--	--	--	--	--	--	--	Rhodanese-like domain-containing protein 4, chloroplastic OS=Arabidopsis thaliana OX=3702 GN=STR4 PE=1 SV=2	--	--	thylakoid rhodanese [Artemisia annua]	--
evm.TU.scaffold_1710.5	evm.TU.scaffold_1710.5	31.1926	829	35.6927	1098	46.9348	1147	22.7921	561	26.7042	707	19.8039	453	0.00671414	-0.65662	down	[I]	Lipid transport and metabolism	Biological Process: lipid metabolic process (GO:0006629);; Cellular Component: integral component of membrane (GO:0016021);; Molecular Function: oxidoreductase activity, acting on paired donors, with oxidation of a pair of donors resulting in the reduction of molecular oxygen to two molecules of water (GO:0016717);;	--	--	--	--	Fatty acid desaturase	Delta(12) fatty acid desaturase DES8.11 OS=Calendula officinalis OX=41496 GN=DES8.11 PE=2 SV=1	--	--	plastid delta12-fatty acid acetylenase [Artemisia annua]	biological process: metabolic process (GO:0008152);; biological process: single-organism process (GO:0044699);; cellular component: membrane (GO:0016020);; cellular component: membrane part (GO:0044425);; molecular function: catalytic activity (GO:0003824)
evm.TU.scaffold_699.934	evm.TU.scaffold_699.934	0.975437	37	1.14103	50	0.654343	23	1.91659	67	3.04277	113	3.44794	111	0.00142536	1.16597	up	[G]	Carbohydrate transport and metabolism	Cellular Component: phosphopyruvate hydratase complex (GO:0000015);; Molecular Function: magnesium ion binding (GO:0000287);; Molecular Function: phosphopyruvate hydratase activity (GO:0004634);; Biological Process: glycolytic process (GO:0006096);;	--	--	[G]	Carbohydrate transport and metabolism	Enolase, C-terminal TIM barrel domain	Enolase OS=Solanum lycopersicum OX=4081 GN=PGH1 PE=2 SV=1	--	--	enolase [Artemisia annua]	cellular component: cell (GO:0005623);; cellular component: macromolecular complex (GO:0032991);; cellular component: cell part (GO:0044464);; molecular function: binding (GO:0005488);; molecular function: catalytic activity (GO:0003824);; biological process: metabolic process (GO:0008152);; biological process: cellular process (GO:0009987);; biological process: single-organism process (GO:004469…
Chrysanthemum_x_morifolium_newGene_13637	--	20.7994	413	14.2973	330	24.9021	457	13.7278	254	10.0301	199	11.5047	196	0.0352202	-0.67197	down	--	--	--	K07374|8.24183e-14|egr:104448060|K07374 tubulin alpha | (RefSeq) tubulin alpha chain	Phagosome (ko04145)	[Z]	Cytoskeleton	--	Tubulin alpha chain OS=Daucus carota OX=4039 GN=TBA PE=2 SV=1	S	Function unknown	tubulin alpha-4 chain-like protein [Trifolium pratense]	--
evm.TU.scaffold_1457.50	evm.TU.scaffold_1457.50	1.22555	33	1.99775	61	1.78625	43	0.136218	4	0.666625	18	0.417136	10	0.0182423	-1.07434	down	[IR]	Lipid transport and metabolism;; General function prediction only	Molecular Function: hydrolase activity, acting on ester bonds (GO:0016788);;	--	--	--	--	GDSL-like Lipase/Acylhydrolase	GDSL esterase/lipase At5g03610 OS=Arabidopsis thaliana OX=3702 GN=At5g03610 PE=2 SV=1	--	--	GDSL esterase/lipase At5g03610-like isoform X1 [Cynara cardunculus var. scolymus]	molecular function: catalytic activity (GO:0003824)
Chrysanthemum_x_morifolium_newGene_68877	--	11.876	336	14.5673	486	10.8736	294	7.30594	243	3.33454	119	5.37602	137	0.0150521	-0.828815	down	--	--	--	--	--	[Q]	Secondary metabolites biosynthesis, transport and catabolism	--	15-cis-phytoene desaturase, chloroplastic/chromoplastic OS=Capsicum annuum OX=4072 GN=PDS PE=1 SV=1	--	--	phytoene desaturase 221, partial [Chrysanthemum indicum]	--
Chrysanthemum_x_morifolium_newGene_108412	--	5.73193	109	4.55024	103	5.03833	84	1.72463	33	1.35642	28	2.26143	29	9.58e-05	-1.25118	down	--	--	--	--	--	--	--	--	--	--	--	--	--
evm.TU.scaffold_4404.249	evm.TU.scaffold_4404.249	0	0	0	0	0	0	174.424	659	124.808	507	154.084	540	1.11e-103	5.82294	up	--	--	--	--	--	--	--	Dormancy/auxin associated protein	--	--	--	--	--
Chrysanthemum_x_morifolium_newGene_85041	--	11.9309	231	10.8098	243	11.6588	213	15.6703	280	18.7496	366	27.2396	462	0.0141448	0.734207	up	--	--	Biological Process: mRNA splicing, via spliceosome (GO:0000398);; Cellular Component: U2-type spliceosomal complex (GO:0005684);; Cellular Component: U2 snRNP (GO:0005686);; Cellular Component: U12-type spliceosomal complex (GO:0005689);; Cellular Component: precatalytic spliceosome (GO:0071011);; Cellular Component: catalytic step 2 spliceosome (GO:0071013);;	K12829|3.6605e-129|sly:101264481|K12829 splicing factor 3B subunit 2 | (RefSeq) splicing factor 3B subunit 2	Spliceosome (ko03040)	[A]	RNA processing and modification	--	--	A	RNA processing and modification	splicing factor 3B subunit 2-like [Helianthus annuus]	biological process: metabolic process (GO:0008152);; biological process: cellular process (GO:0009987);; cellular component: cell (GO:0005623);; cellular component: macromolecular complex (GO:0032991);; cellular component: organelle (GO:0043226);; cellular component: organelle part (GO:0044422);; cellular component: cell part (GO:0044464)
evm.TU.scaffold_195.1	evm.TU.scaffold_195.1	0	0	0.229796	10	0	0	1.13144	38	0.828152	30	0.851236	26	0.0204044	1.01415	up	[IQ]	Lipid transport and metabolism;; Secondary metabolites biosynthesis, transport and catabolism	Molecular Function: transferase activity (GO:0016740);;	--	--	[IQ]	Lipid transport and metabolism;; Secondary metabolites biosynthesis, transport and catabolism	Beta-ketoacyl synthase, N-terminal domain	3-oxoacyl-[acyl-carrier-protein] synthase I, chloroplastic OS=Arabidopsis thaliana OX=3702 GN=KAS1 PE=1 SV=2	--	--	3-oxoacyl-[acyl-carrier-protein] synthase 2 [Artemisia annua]	molecular function: catalytic activity (GO:0003824)
evm.TU.scaffold_177.34	evm.TU.scaffold_177.34	4.86656	237	3.91615	221	3.7925	170	2.91993	132	2.46692	120	2.41481	101	0.0444852	-0.616134	down	[T]	Signal transduction mechanisms	Molecular Function: protein kinase activity (GO:0004672);; Molecular Function: ATP binding (GO:0005524);; Cellular Component: integral component of membrane (GO:0016021);;	--	--	--	--	Protein tyrosine and serine/threonine kinase	Cysteine-rich receptor-like protein kinase 42 OS=Arabidopsis thaliana OX=3702 GN=CRK42 PE=2 SV=1	--	--	cysteine-rich RLK (RECEPTOR-like protein kinase) 42 [Artemisia annua]	molecular function: catalytic activity (GO:0003824);; biological process: metabolic process (GO:0008152);; biological process: cellular process (GO:0009987);; molecular function: binding (GO:0005488);; cellular component: membrane (GO:0016020);; cellular component: membrane part (GO:0044425)
Chrysanthemum_x_morifolium_newGene_104177	--	2.1393	43	0.973306	36	1.39911	25	1.88441	60	4.04655	97	3.58368	80	0.00967962	0.994943	up	--	--	--	K02365|5.61279e-11|fve:101295530|K02365 separase [EC:3.4.22.49] | (RefSeq) separase-like	--	--	--	--	Separase OS=Arabidopsis thaliana OX=3702 GN=ESP1 PE=2 SV=1	DO	Cell cycle control, cell division, chromosome partitioning;; Posttranslational modification, protein turnover, chaperones	separase [Olea europaea var. sylvestris]	--
Chrysanthemum_x_morifolium_newGene_76062	--	43.3162	211	42.9994	242	41.7035	187	0.415013	2	0.24135	2	0.192769	1	1.95e-48	-4.19536	down	--	--	--	--	--	--	--	--	--	--	--	--	--
evm.TU.scaffold_1198.17	evm.TU.scaffold_1198.17	13.4148	386	14.5198	484	11.9018	315	19.5219	521	22.353	641	20.0557	497	0.00280606	0.595113	up	[L]	Replication, recombination and repair	Molecular Function: lyase activity (GO:0016829);;	--	--	[LT]	Replication, recombination and repair;; Signal transduction mechanisms	DNA photolyase	Blue-light photoreceptor PHR2 OS=Arabidopsis thaliana OX=3702 GN=PHR2 PE=2 SV=2	--	--	DNA photolyase class 1, 8-HDF type [Artemisia annua]	molecular function: catalytic activity (GO:0003824)
evm.TU.scaffold_1616.184	evm.TU.scaffold_1616.184	3.40434	149	3.89927	198	2.89748	117	6.885	279	4.98062	217	4.90663	185	0.049656	0.621919	up	[T]	Signal transduction mechanisms	Molecular Function: protein kinase activity (GO:0004672);; Molecular Function: ATP binding (GO:0005524);;	--	--	[R]	General function prediction only	Protein kinase domain	Serine/threonine-protein kinase STN7, chloroplastic OS=Arabidopsis thaliana OX=3702 GN=STN7 PE=1 SV=1	--	--	STT7-like protein [Artemisia annua]	molecular function: catalytic activity (GO:0003824);; biological process: metabolic process (GO:0008152);; biological process: cellular process (GO:0009987);; molecular function: binding (GO:0005488)
evm.TU.scaffold_asm7_new.42	evm.TU.scaffold_asm7_new.42	2.80336	250	2.28937	236	2.77546	227	0.92872	77	1.61158	143	1.15732	89	0.00169307	-0.92993	down	[T]	Signal transduction mechanisms	Molecular Function: ATP binding (GO:0005524);; Cellular Component: integral component of membrane (GO:0016021);; Molecular Function: ATPase activity (GO:0016887);;	--	--	[Q]	Secondary metabolites biosynthesis, transport and catabolism	ABC-2 type transporter	ABC transporter G family member 39 OS=Arabidopsis thaliana OX=3702 GN=ABCG39 PE=3 SV=1	--	--	AAA+ ATPase domain-containing protein [Artemisia annua]	molecular function: binding (GO:0005488);; cellular component: membrane (GO:0016020);; cellular component: membrane part (GO:0044425);; molecular function: catalytic activity (GO:0003824)
evm.TU.scaffold_4163.87	evm.TU.scaffold_4163.87	14.2916	259	9.83151	206	10.1643	169	5.50278	93	6.04052	109	5.86152	92	0.00418226	-0.846031	down	--	--	Molecular Function: electron carrier activity (GO:0009055);;	--	--	--	--	Plastocyanin-like domain	Early nodulin-like protein 1 OS=Arabidopsis thaliana OX=3702 GN=At2g25060 PE=2 SV=2	--	--	Cupredoxin [Artemisia annua]	molecular function: electron carrier activity (GO:0009055)
evm.TU.scaffold_3380.82	evm.TU.scaffold_3380.82	0.83769	48	1.09928	73	0.82616	44	1.9758	104	1.78471	101	1.52908	75	0.0426338	0.749391	up	[J]	Translation, ribosomal structure and biogenesis	Biological Process: tRNA processing (GO:0008033);;	--	--	[R]	General function prediction only	tRNase Z endonuclease	tRNAse Z TRZ4, mitochondrial OS=Arabidopsis thaliana OX=3702 GN=TRZ4 PE=2 SV=1	--	--	tRNAse Z4 [Artemisia annua]	biological process: metabolic process (GO:0008152);; biological process: cellular process (GO:0009987)
Chrysanthemum_x_morifolium_newGene_28845	--	6.76625	119	9.51822	190	8.08249	134	5.13331	81	3.79594	67	5.51283	80	0.0497317	-0.680214	down	--	--	--	--	--	--	--	--	--	--	--	--	--
Chrysanthemum_x_morifolium_newGene_4883	--	0.506542	16	0.709435	25	0.575224	16	2.23786	62	2.18606	65	0.965803	25	0.0320451	0.975962	up	[R]	General function prediction only	--	--	--	[S]	Function unknown	--	WD-40 repeat-containing protein MSI3 OS=Arabidopsis thaliana OX=3702 GN=MSI3 PE=1 SV=2	S	Function unknown	WD repeat-containing protein 76 [Helianthus annuus]	--
Chrysanthemum_x_morifolium_newGene_106038	--	1.96145	50	1.97624	59	2.32608	55	0.880761	21	1.03294	27	0.547026	12	0.0364616	-0.919224	down	--	--	--	--	--	--	--	--	--	--	--	--	--
evm.TU.scaffold_1142.351	evm.TU.scaffold_1142.351	32.8599	296	43.3559	452	62.3192	516	78.7254	656	93.4449	837	74.0336	573	0.00997676	0.73422	up	--	--	--	--	--	--	--	--	--	--	--	hypothetical protein CTI12_AA274250 [Artemisia annua]	--
evm.TU.scaffold_983.215	evm.TU.scaffold_983.215	3.03723	122	4.3354	202	3.79946	141	6.16018	229	5.94188	238	6.28049	217	0.0170365	0.642013	up	[E]	Amino acid transport and metabolism	Molecular Function: serine-type carboxypeptidase activity (GO:0004185);;	--	--	[OE]	Posttranslational modification, protein turnover, chaperones;; Amino acid transport and metabolism	Serine carboxypeptidase	Serine carboxypeptidase-like 42 OS=Arabidopsis thaliana OX=3702 GN=SCPL42 PE=2 SV=1	--	--	serine carboxypeptidase-like 42 [Artemisia annua]	molecular function: catalytic activity (GO:0003824);; biological process: metabolic process (GO:0008152)
evm.TU.scaffold_1614.8	evm.TU.scaffold_1614.8	23.7674	411	22.7886	457	20.6977	329	10.4707	168	8.19081	141	9.45136	141	3.67e-09	-1.16344	down	--	--	Biological Process: response to water (GO:0009415);;	--	--	--	--	Dehydrin	--	--	--	dehydrin 2 [Cichorium intybus]	biological process: response to stimulus (GO:0050896)
evm.TU.scaffold_525.365	evm.TU.scaffold_525.365	3.08311	53	5.27679	104	9.07612	142	18.7535	296	14.7474	250	12.9665	190	0.00231495	1.09048	up	--	--	Cellular Component: photosystem II oxygen evolving complex (GO:0009654);; Biological Process: photosynthesis (GO:0015979);;	--	--	--	--	Psb28 protein	Photosystem II reaction center PSB28 protein, chloroplastic OS=Oryza sativa subsp. japonica OX=39947 GN=PSB28 PE=2 SV=2	--	--	hypothetical protein CTI12_AA353680 [Artemisia annua]	cellular component: cell (GO:0005623);; cellular component: membrane (GO:0016020);; cellular component: macromolecular complex (GO:0032991);; cellular component: membrane part (GO:0044425);; cellular component: cell part (GO:0044464);; biological process: metabolic process (GO:0008152);; biological process: cellular process (GO:0009987)
evm.TU.scaffold_560.207	evm.TU.scaffold_560.207	68.9347	2634	59.8001	2646	64.0763	2252	41.3828	1465	40.0572	1524	32.5777	1071	9.73e-06	-0.727502	down	--	--	Cellular Component: plant-type vacuole (GO:0000325);; Biological Process: cell morphogenesis (GO:0000902);; Molecular Function: molecular_function (GO:0003674);; Molecular Function: transporter activity (GO:0005215);; Cellular Component: cellular_component (GO:0005575);; Cellular Component: intracellular (GO:0005622);; Cellular Component: cell (GO:0005623);; Cellular Component: cytoplasm (GO:0005…	--	--	--	--	EamA-like transporter family	Protein WALLS ARE THIN 1 OS=Arabidopsis thaliana OX=3702 GN=WAT1 PE=1 SV=1	--	--	walls Are Thin 1 [Artemisia annua]	cellular component: cell (GO:0005623);; cellular component: organelle (GO:0043226);; cellular component: cell part (GO:0044464);; biological process: cellular process (GO:0009987);; biological process: developmental process (GO:0032502);; biological process: single-organism process (GO:0044699);; biological process: cellular component organization or biogenesis (GO:0071840);; molecular function: …
evm.TU.scaffold_1438.408	evm.TU.scaffold_1438.408	6.84631	211	7.17135	256	8.29346	235	4.18789	120	3.27135	101	3.6954	98	0.000223669	-0.898044	down	[M]	Cell wall/membrane/envelope biogenesis	Molecular Function: transferase activity, transferring glycosyl groups (GO:0016757);;	--	--	--	--	Glycosyl transferase family 8	Probable galacturonosyltransferase-like 1 OS=Arabidopsis thaliana OX=3702 GN=GATL1 PE=2 SV=1	--	--	Glycosyl transferase, family 8 [Artemisia annua]	molecular function: catalytic activity (GO:0003824)
evm.TU.scaffold_1246.16	evm.TU.scaffold_1246.16	0.144317	9	0.129278	9	0.177777	10	0.907293	51	0.760963	46	0.273003	15	0.0172115	1.0873	up	--	--	Cellular Component: nucleus (GO:0005634);; Molecular Function: metal ion binding (GO:0046872);;	--	--	--	--	PHD-finger	Methyl-CpG-binding domain-containing protein 9 OS=Arabidopsis thaliana OX=3702 GN=MBD9 PE=2 SV=1	--	--	bromodomain-containing protein [Artemisia annua]	cellular component: cell (GO:0005623);; cellular component: organelle (GO:0043226);; cellular component: cell part (GO:0044464);; molecular function: binding (GO:0005488)
Chrysanthemum_x_morifolium_newGene_43143	--	1.04594	32	1.64106	57	1.84023	51	0.327906	10	0.619416	19	0.593599	16	0.0412744	-0.944154	down	--	--	Cellular Component: plasma membrane (GO:0005886);; Molecular Function: zinc ion binding (GO:0008270);; Cellular Component: integral component of membrane (GO:0016021);; Molecular Function: cellulose synthase (UDP-forming) activity (GO:0016760);; Biological Process: cellulose biosynthetic process (GO:0030244);; Biological Process: cell wall organization (GO:0071555);;	K10999|2.67541e-81|sot:102578178|K10999 cellulose synthase A [EC:2.4.1.12] | (RefSeq) cellulose synthase A catalytic subunit 7 [UDP-forming]	--	--	--	--	Cellulose synthase A catalytic subunit 7 [UDP-forming] OS=Arabidopsis thaliana OX=3702 GN=CESA7 PE=1 SV=1	M	Cell wall/membrane/envelope biogenesis	cellulose synthase, partial [Nicotiana tabacum]	cellular component: cell (GO:0005623);; cellular component: membrane (GO:0016020);; cellular component: cell part (GO:0044464);; molecular function: binding (GO:0005488);; cellular component: membrane part (GO:0044425);; molecular function: catalytic activity (GO:0003824);; biological process: metabolic process (GO:0008152);; biological process: cellular process (GO:0009987);; biological process:…
evm.TU.scaffold_271.76	evm.TU.scaffold_271.76	3.86424	72	4.91074	105	3.97262	68	7.84581	135	7.42847	137	8.52615	136	0.00931446	0.775858	up	--	--	--	--	--	--	--	PAP_fibrillin	Probable plastid-lipid-associated protein 13, chloroplastic OS=Arabidopsis thaliana OX=3702 GN=PAP13 PE=1 SV=2	--	--	Plastid lipid-associated protein/fibrillin conserved domain-containing protein [Artemisia annua]	--
evm.TU.scaffold_8796.38	evm.TU.scaffold_8796.38	89.6002	1696	83.159	1823	60.1488	1048	140.823	2470	117.367	2212	123.885	2017	0.00346437	0.653665	up	--	--	Cellular Component: integral component of membrane (GO:0016021);;	--	--	--	--	Hydrophobic seed protein	14 kDa proline-rich protein DC2.15 OS=Daucus carota OX=4039 PE=2 SV=1	--	--	hypothetical protein CTI12_AA176020 [Artemisia annua]	cellular component: membrane (GO:0016020);; cellular component: membrane part (GO:0044425)
evm.TU.scaffold_900.139	evm.TU.scaffold_900.139	196.55	4339	163.251	4174	149.09	3028	98.1387	2008	80.3593	1767	106.098	2015	3.53e-05	-0.79259	down	[G]	Carbohydrate transport and metabolism	Molecular Function: channel activity (GO:0015267);; Cellular Component: integral component of membrane (GO:0016021);;	--	--	[G]	Carbohydrate transport and metabolism	Major intrinsic protein	Probable aquaporin PIP2-6 OS=Oryza sativa subsp. japonica OX=39947 GN=PIP2-6 PE=2 SV=2	--	--	major intrinsic protein, Aquaporin-like protein [Artemisia annua]	molecular function: transporter activity (GO:0005215);; biological process: localization (GO:0051179);; cellular component: membrane (GO:0016020);; cellular component: membrane part (GO:0044425)
evm.TU.scaffold_1112.30	evm.TU.scaffold_1112.30	1.12261	34	2.01401	70	1.69952	47	4.00744	111	2.70724	81	4.94383	127	0.0123001	0.95677	up	[L]	Replication, recombination and repair	Molecular Function: catalytic activity (GO:0003824);; Molecular Function: GTP binding (GO:0005525);; Cellular Component: integral component of membrane (GO:0016021);;	--	--	[O]	Posttranslational modification, protein turnover, chaperones	Dynamin family	Probable transmembrane GTPase FZO-like, chloroplastic OS=Arabidopsis thaliana OX=3702 GN=FZL PE=1 SV=1	--	--	FZO-like protein [Artemisia annua]	molecular function: catalytic activity (GO:0003824);; molecular function: binding (GO:0005488);; cellular component: membrane (GO:0016020);; cellular component: membrane part (GO:0044425)
evm.TU.scaffold_279.45	evm.TU.scaffold_279.45	0.112881	4	0.233695	9	0.143343	5	0.947797	27	0.866836	27	0.649102	18	0.0226148	1.05804	up	--	--	Biological Process: recognition of pollen (GO:0048544);;	--	--	--	--	D-mannose binding lectin	EP1-like glycoprotein 4 OS=Arabidopsis thaliana OX=3702 GN=At1g78860 PE=3 SV=1	--	--	putative S-locus glycoprotein [Helianthus annuus]	biological process: reproduction (GO:0000003);; biological process: cellular process (GO:0009987);; biological process: reproductive process (GO:0022414);; biological process: single-organism process (GO:0044699)
Chrysanthemum_x_morifolium_newGene_2286	--	4.21707	53	2.37024	34	4.09097	47	0.681616	8	1.65583	21	1.06804	12	0.0484634	-0.943834	down	--	--	Molecular Function: transporter activity (GO:0005215);; Biological Process: transport (GO:0006810);; Cellular Component: integral component of membrane (GO:0016021);;	K12347|4.17534e-46|tcc:TCM_035174|K12347 natural resistance-associated macrophage protein | (RefSeq) Nramp transporter	--	[P]	Inorganic ion transport and metabolism	--	Metal transporter Nramp5 OS=Oryza sativa subsp. japonica OX=39947 GN=NRAMP5 PE=2 SV=1	P	Inorganic ion transport and metabolism	metal transporter Nramp5-like [Helianthus annuus]	molecular function: transporter activity (GO:0005215);; biological process: localization (GO:0051179);; cellular component: membrane (GO:0016020);; cellular component: membrane part (GO:0044425)
evm.TU.scaffold_5655.130	evm.TU.scaffold_5655.130	1.13918	46	1.43317	66	1.0534	39	3.28049	121	4.04754	160	2.44322	84	0.000468143	1.13568	up	[QV]	Secondary metabolites biosynthesis, transport and catabolism;; Defense mechanisms	Molecular Function: monooxygenase activity (GO:0004497);; Molecular Function: iron ion binding (GO:0005506);; Molecular Function: oxidoreductase activity, acting on paired donors, with incorporation or reduction of molecular oxygen (GO:0016705);; Molecular Function: heme binding (GO:0020037);;	--	--	[Q]	Secondary metabolites biosynthesis, transport and catabolism	Cytochrome P450	Cytochrome P450 76C1 OS=Arabidopsis thaliana OX=3702 GN=CYP76C1 PE=2 SV=1	--	--	cytochrome P450 [Artemisia annua]	molecular function: catalytic activity (GO:0003824);; biological process: metabolic process (GO:0008152);; biological process: single-organism process (GO:0044699);; molecular function: binding (GO:0005488)
Chrysanthemum_x_morifolium_newGene_82932	--	10.1586	259	15.8286	448	15.5174	376	3.67333	85	8.03649	210	5.26309	114	0.00217851	-1.02795	down	--	--	--	K11699|6.40565e-54|vvi:100260997|K11699 RNA-dependent RNA polymerase [EC:2.7.7.48] | (RefSeq) probable RNA-dependent RNA polymerase 5	--	[A]	RNA processing and modification	RNA dependent RNA polymerase	Probable RNA-dependent RNA polymerase 5 OS=Arabidopsis thaliana OX=3702 GN=RDR5 PE=2 SV=2	K	Transcription	probable RNA-dependent RNA polymerase 5 [Lactuca sativa]	--
evm.TU.scaffold_858.475	evm.TU.scaffold_858.475	7.30224	31	5.57917	27	5.98587	23	0	0	0	0	0	0	9.44e-06	-1.68604	down	[J]	Translation, ribosomal structure and biogenesis	Molecular Function: structural constituent of ribosome (GO:0003735);; Cellular Component: ribosome (GO:0005840);; Biological Process: translation (GO:0006412);; Cellular Component: integral component of membrane (GO:0016021);;	--	--	[J]	Translation, ribosomal structure and biogenesis	Ribosomal protein L33	--	--	--	Ribosomal protein L33 [Artemisia annua]	molecular function: structural molecule activity (GO:0005198);; cellular component: cell (GO:0005623);; cellular component: macromolecular complex (GO:0032991);; cellular component: organelle (GO:0043226);; cellular component: cell part (GO:0044464);; biological process: metabolic process (GO:0008152);; biological process: cellular process (GO:0009987);; cellular component: membrane (GO:0016020);…
evm.TU.scaffold_94.19	evm.TU.scaffold_94.19	15.6479	650	19.7497	950	17.2167	658	29.7956	1147	32.2818	1335	29.8845	1067	5.69e-07	0.765943	up	[O]	Posttranslational modification, protein turnover, chaperones	Molecular Function: ATP binding (GO:0005524);; Biological Process: protein refolding (GO:0042026);;	--	--	[O]	Posttranslational modification, protein turnover, chaperones	TCP-1/cpn60 chaperonin family	Chaperonin 60 subunit alpha 1, chloroplastic OS=Arabidopsis thaliana OX=3702 GN=CPN60A1 PE=1 SV=2	--	--	RuBisCO large subunit-binding protein subunit alpha [Artemisia annua]	molecular function: binding (GO:0005488);; biological process: cellular process (GO:0009987)
evm.TU.scaffold_500.206	evm.TU.scaffold_500.206	1.44974	59	1.19243	56	1.75265	66	0.260588	10	0.597001	25	0.326574	12	0.00354717	-1.19156	down	[DPM]	Cell cycle control, cell division, chromosome partitioning;; Inorganic ion transport and metabolism;; Cell wall/membrane/envelope biogenesis	Molecular Function: copper ion binding (GO:0005507);; Biological Process: lignin catabolic process (GO:0046274);; Cellular Component: apoplast (GO:0048046);; Molecular Function: hydroquinone:oxygen oxidoreductase activity (GO:0052716);;	--	--	[Q]	Secondary metabolites biosynthesis, transport and catabolism	Multicopper oxidase	Laccase-6 OS=Arabidopsis thaliana OX=3702 GN=LAC6 PE=2 SV=1	--	--	laccase [Artemisia annua]	molecular function: binding (GO:0005488);; biological process: metabolic process (GO:0008152);; biological process: cellular process (GO:0009987);; biological process: single-organism process (GO:0044699);; cellular component: extracellular region (GO:0005576);; molecular function: catalytic activity (GO:0003824)
Chrysanthemum_x_morifolium_newGene_34144	--	1.27123	41	2.96581	109	2.0289	60	0.899376	27	0.799267	26	0.772632	22	0.0432937	-0.902534	down	--	--	--	--	--	--	--	--	Protein FAR-RED IMPAIRED RESPONSE 1 OS=Arabidopsis thaliana OX=3702 GN=FAR1 PE=1 SV=1	S	Function unknown	putative FAR1 DNA binding domain, Zinc finger, SWIM-type, MULE transposase domain, FHY3/FAR1 family [Helianthus annuus]	--
evm.TU.scaffold_7840.75	evm.TU.scaffold_7840.75	5.0942	153	5.28753	184	5.26008	145	9.96972	277	7.95293	237	7.7406	200	0.0122632	0.644068	up	[H]	Coenzyme transport and metabolism	Cellular Component: cytosol (GO:0005829);; Molecular Function: 1,4-dihydroxy-2-naphthoyl-CoA synthase activity (GO:0008935);; Biological Process: menaquinone biosynthetic process (GO:0009234);; Molecular Function: isomerase activity (GO:0016853);;	--	--	[I]	Lipid transport and metabolism	Enoyl-CoA hydratase/isomerase	1,4-dihydroxy-2-naphthoyl-CoA synthase, peroxisomal OS=Arabidopsis thaliana OX=3702 GN=MENB PE=1 SV=2	--	--	1,4-dihydroxy-2-naphthoyl-CoA synthase, peroxisomal [Helianthus annuus]	cellular component: cell (GO:0005623);; cellular component: cell part (GO:0044464);; molecular function: catalytic activity (GO:0003824);; biological process: metabolic process (GO:0008152);; biological process: cellular process (GO:0009987);; biological process: single-organism process (GO:0044699)
evm.TU.scaffold_7037.52	evm.TU.scaffold_7037.52	18.6958	413	14.8135	379	15.2586	310	7.88607	162	10.5268	232	9.88441	188	0.00514424	-0.713656	down	--	--	Cellular Component: integral component of membrane (GO:0016021);;	--	--	--	--	Protein of unknown function (DUF1195)	--	--	--	hypothetical protein CTI12_AA298570 [Artemisia annua]	cellular component: membrane (GO:0016020);; cellular component: membrane part (GO:0044425)
evm.TU.scaffold_47.142	evm.TU.scaffold_47.142	4.28972	88	5.2191	124	5.80184	109	8.06522	153	8.22687	167	8.79073	155	0.0368903	0.628415	up	--	--	--	--	--	[E]	Amino acid transport and metabolism	Serine hydrolase (FSH1)	--	--	--	hypothetical protein CTI12_AA580690 [Artemisia annua]	--
Chrysanthemum_x_morifolium_newGene_62725	--	4.35277	51	6.58035	92	5.08547	58	2.59185	30	1.80883	20	2.18518	21	0.0209438	-0.959131	down	--	--	--	--	--	--	--	--	--	--	--	--	--
evm.TU.scaffold_858.136	evm.TU.scaffold_858.136	24.9627	803	28.2456	1052	24.7158	731	19.4911	581	15.7529	504	12.9917	360	0.00410834	-0.645913	down	[IR]	Lipid transport and metabolism;; General function prediction only	Cellular Component: integral component of membrane (GO:0016021);; Molecular Function: hydrolase activity, acting on ester bonds (GO:0016788);;	--	--	--	--	GDSL-like Lipase/Acylhydrolase	GDSL esterase/lipase At4g28780 OS=Arabidopsis thaliana OX=3702 GN=At4g28780 PE=2 SV=1	--	--	SGNH hydrolase-type esterase domain-containing protein [Artemisia annua]	cellular component: membrane (GO:0016020);; cellular component: membrane part (GO:0044425);; molecular function: catalytic activity (GO:0003824)
evm.TU.scaffold_1622.47	evm.TU.scaffold_1622.47	5.83745	117	5.13611	119	6.83136	126	2.95618	55	3.51723	70	2.97868	51	0.0224831	-0.771699	down	--	--	--	--	--	--	--	Protein of unknown function (DUF1645)	--	--	--	hypothetical protein CTI12_AA438860 [Artemisia annua]	--
evm.TU.scaffold_4785.15	evm.TU.scaffold_4785.15	3.6966	107	5.68077	191	8.25609	220	11.3567	304	11.3738	328	10.2484	255	0.024302	0.76184	up	[Q]	Secondary metabolites biosynthesis, transport and catabolism	Molecular Function: copper ion binding (GO:0005507);; Molecular Function: primary amine oxidase activity (GO:0008131);; Biological Process: amine metabolic process (GO:0009308);; Cellular Component: integral component of membrane (GO:0016021);; Molecular Function: quinone binding (GO:0048038);;	--	--	[Q]	Secondary metabolites biosynthesis, transport and catabolism	Copper amine oxidase, enzyme domain	Primary amine oxidase OS=Arabidopsis thaliana OX=3702 GN=At1g62810 PE=2 SV=1	--	--	copper amine oxidase family protein [Artemisia annua]	molecular function: binding (GO:0005488);; molecular function: catalytic activity (GO:0003824);; biological process: metabolic process (GO:0008152);; biological process: single-organism process (GO:0044699);; cellular component: membrane (GO:0016020);; cellular component: membrane part (GO:0044425)
Chrysanthemum_x_morifolium_newGene_4624	--	2.83031	54	2.95064	65	2.60372	46	1.30668	23	1.09867	21	1.2485	21	0.0412605	-0.870976	down	--	--	Molecular Function: metal ion binding (GO:0046872);;	K18753|1.78069e-11|sot:102594190|K18753 butyrate response factor 1 | (RefSeq) zinc finger CCCH domain-containing protein 15-like	--	[R]	General function prediction only	--	Zinc finger CCCH domain-containing protein 15 OS=Arabidopsis thaliana OX=3702 GN=At1g68200 PE=2 SV=1	S	Function unknown	Zinc finger, CCCH-type [Cynara cardunculus var. scolymus]	molecular function: binding (GO:0005488)
Chrysanthemum_x_morifolium_newGene_53319	--	0.996292	30	0.576687	20	0.776839	22	2.04601	57	2.08122	62	1.53015	40	0.0462954	0.882841	up	[R]	General function prediction only	Molecular Function: transferase activity (GO:0016740);;	--	--	[K]	Transcription	SET domain	Histone-lysine N-methyltransferase ASHR3 OS=Arabidopsis thaliana OX=3702 GN=ASHR3 PE=1 SV=1	S	Function unknown	LOW QUALITY PROTEIN: histone-lysine N-methyltransferase ASHR3 [Helianthus annuus]	molecular function: catalytic activity (GO:0003824)
evm.TU.scaffold_985.228	evm.TU.scaffold_985.228	20.5343	509	19.954	573	24.0132	548	13.6706	314	14.6503	362	11.3317	242	0.00201711	-0.655887	down	--	--	Cellular Component: nucleus (GO:0005634);; Biological Process: regulation of transcription, DNA-templated (GO:0006355);; Biological Process: auxin-activated signaling pathway (GO:0009734);;	--	--	--	--	AUX/IAA family	Auxin-responsive protein IAA13 OS=Arabidopsis thaliana OX=3702 GN=IAA13 PE=1 SV=2	--	--	auxin-responsive protein IAA13 [Cynara cardunculus var. scolymus]	cellular component: cell (GO:0005623);; cellular component: organelle (GO:0043226);; cellular component: cell part (GO:0044464);; biological process: biological regulation (GO:0065007);; biological process: cellular process (GO:0009987);; biological process: signaling (GO:0023052);; biological process: single-organism process (GO:0044699);; biological process: response to stimulus (GO:0050896)
evm.TU.scaffold_6916.123	evm.TU.scaffold_6916.123	145.454	1886	138.759	2083	84.572	1009	285.168	3425	172.706	2229	185.052	2063	0.0319468	0.686905	up	--	--	Cellular Component: cell wall (GO:0005618);; Molecular Function: manganese ion binding (GO:0030145);; Molecular Function: nutrient reservoir activity (GO:0045735);; Cellular Component: apoplast (GO:0048046);;	--	--	--	--	Cupin	Germin-like protein subfamily 3 member 3 OS=Arabidopsis thaliana OX=3702 GN=GER3 PE=1 SV=1	--	--	auxin-binding protein ABP19a [Artemisia annua]	cellular component: cell (GO:0005623);; cellular component: cell part (GO:0044464);; molecular function: binding (GO:0005488);; molecular function: nutrient reservoir activity (GO:0045735);; cellular component: extracellular region (GO:0005576)
evm.TU.scaffold_7251.62	evm.TU.scaffold_7251.62	3.77387	193	3.45532	205	3.72881	176	6.87375	326	8.86486	452	5.37486	237	0.00168871	0.836544	up	[F]	Nucleotide transport and metabolism	Molecular Function: ribonucleoside-diphosphate reductase activity, thioredoxin disulfide as acceptor (GO:0004748);; Molecular Function: ATP binding (GO:0005524);; Biological Process: DNA replication (GO:0006260);;	--	--	[F]	Nucleotide transport and metabolism	Ribonucleotide reductase, barrel domain	Ribonucleoside-diphosphate reductase large subunit OS=Arabidopsis thaliana OX=3702 GN=RNR1 PE=1 SV=1	--	--	ribonucleotide reductase 1 [Artemisia annua]	molecular function: catalytic activity (GO:0003824);; biological process: metabolic process (GO:0008152);; biological process: single-organism process (GO:0044699);; molecular function: binding (GO:0005488);; biological process: cellular process (GO:0009987)
evm.TU.scaffold_1759.156	evm.TU.scaffold_1759.156	2.5685	73	2.73688	90	3.25868	85	1.09165	29	1.17454	34	1.07937	27	0.0026935	-1.04574	down	[F]	Nucleotide transport and metabolism	Molecular Function: thymidylate kinase activity (GO:0004798);; Molecular Function: ATP binding (GO:0005524);; Biological Process: dTDP biosynthetic process (GO:0006233);; Molecular Function: hydrolase activity (GO:0016787);;	--	--	[F]	Nucleotide transport and metabolism	Thymidylate kinase	Thymidylate kinase OS=Arabidopsis thaliana OX=3702 GN=ZEU1 PE=2 SV=1	--	--	thymidylate kinase, P-loop containing nucleoside triphosphate hydrolase [Artemisia annua]	molecular function: catalytic activity (GO:0003824);; biological process: metabolic process (GO:0008152);; biological process: cellular process (GO:0009987);; biological process: single-organism process (GO:0044699);; molecular function: binding (GO:0005488)
Chrysanthemum_x_morifolium_newGene_100517	--	0.708218	30	1.23351	46	0.529581	26	1.6584	48	2.18794	93	2.09457	66	0.0462954	0.856515	up	[R]	General function prediction only	Molecular Function: single-stranded RNA binding (GO:0003727);; Cellular Component: chromatin silencing complex (GO:0005677);; Biological Process: regulation of gene expression by genetic imprinting (GO:0006349);; Molecular Function: methyltransferase activity (GO:0008168);; Cellular Component: plasmodesma (GO:0009506);; Cellular Component: integral component of membrane (GO:0016021);; Cellular Co…	K11430|1.00524e-47|mtr:MTR_1g086980|K11430 histone-lysine N-methyltransferase EZH2 [EC:2.1.1.43] | (RefSeq) histone-lysine N-methyltransferase	--	[K]	Transcription	SET domain	Histone-lysine N-methyltransferase EZA1 OS=Arabidopsis thaliana OX=3702 GN=EZA1 PE=1 SV=1	S	Function unknown	histone-lysine N-methyltransferase EZA1 isoform X1 [Helianthus annuus]	molecular function: binding (GO:0005488);; cellular component: cell (GO:0005623);; cellular component: membrane-enclosed lumen (GO:0031974);; cellular component: macromolecular complex (GO:0032991);; cellular component: organelle (GO:0043226);; cellular component: organelle part (GO:0044422);; cellular component: cell part (GO:0044464);; biological process: metabolic process (GO:0008152);; biolog…
evm.TU.scaffold_9031.73	evm.TU.scaffold_9031.73	3.85287	78	4.51346	106	4.19335	78	7.32439	138	7.1428	144	7.17678	125	0.0197124	0.689888	up	--	--	Cellular Component: integral component of membrane (GO:0016021);; Cellular Component: chloroplast membrane (GO:0031969);;	--	--	--	--	Chloroplast import apparatus Tic20-like	Protein TIC 20-II, chloroplastic OS=Arabidopsis thaliana OX=3702 GN=TIC20-II PE=2 SV=1	--	--	hypothetical protein CTI12_AA433970 [Artemisia annua]	cellular component: membrane (GO:0016020);; cellular component: membrane part (GO:0044425);; cellular component: cell (GO:0005623);; cellular component: organelle (GO:0043226);; cellular component: organelle part (GO:0044422);; cellular component: cell part (GO:0044464)
evm.TU.scaffold_10817.15	evm.TU.scaffold_10817.15	8.74747	294	7.09829	277	5.58602	173	4.15676	130	3.73987	126	3.89339	113	0.0108187	-0.757565	down	[E]	Amino acid transport and metabolism	Molecular Function: serine-type carboxypeptidase activity (GO:0004185);;	--	--	[OE]	Posttranslational modification, protein turnover, chaperones;; Amino acid transport and metabolism	Serine carboxypeptidase	Serine carboxypeptidase-like 49 OS=Arabidopsis thaliana OX=3702 GN=SCPL49 PE=2 SV=2	--	--	peptidase S10, serine carboxypeptidase, Alpha/Beta hydrolase fold protein [Artemisia annua]	molecular function: catalytic activity (GO:0003824);; biological process: metabolic process (GO:0008152)
evm.TU.scaffold_10269.77	evm.TU.scaffold_10269.77	0.619102	25	0.660303	30	0.644548	24	2.06331	75	1.83825	72	1.18999	40	0.013784	0.993541	up	[I]	Lipid transport and metabolism	Biological Process: lipid metabolic process (GO:0006629);; Cellular Component: integral component of membrane (GO:0016021);; Molecular Function: oxidoreductase activity, acting on paired donors, with oxidation of a pair of donors resulting in the reduction of molecular oxygen to two molecules of water (GO:0016717);;	--	--	--	--	Domain of unknown function (DUF3474)	Omega-3 fatty acid desaturase, chloroplastic OS=Sesamum indicum OX=4182 GN=FAD7 PE=2 SV=1	--	--	hypothetical protein CTI12_AA268310 [Artemisia annua]	biological process: metabolic process (GO:0008152);; biological process: single-organism process (GO:0044699);; cellular component: membrane (GO:0016020);; cellular component: membrane part (GO:0044425);; molecular function: catalytic activity (GO:0003824)
evm.TU.scaffold_7983.54	evm.TU.scaffold_7983.54	7.64541	139	8.43806	177	6.92728	116	3.73321	63	5.33374	97	4.0331	63	0.0443895	-0.691555	down	--	--	--	--	--	--	--	Domain of unknown function (DUF4228)	--	--	--	hypothetical protein CTI12_AA018810 [Artemisia annua]	--
Chrysanthemum_x_morifolium_newGene_91176	--	19.3969	119	18.891	134	22.3	126	10.6498	61	12.8532	79	10.3615	55	0.0327816	-0.710231	down	--	--	--	--	--	--	--	--	--	--	--	--	--
Chrysanthemum_x_morifolium_newGene_9348	--	4.47584	79	6.34368	129	5.55047	90	1.15405	19	2.97035	52	1.16662	18	0.00628949	-1.10909	down	--	--	--	--	--	[T]	Signal transduction mechanisms	Protein tyrosine kinase	Receptor-like protein kinase ANXUR1 OS=Arabidopsis thaliana OX=3702 GN=ANX1 PE=2 SV=1	T	Signal transduction mechanisms	hypothetical protein LSAT_1X84440 [Lactuca sativa]	--
evm.TU.scaffold_6202.9	evm.TU.scaffold_6202.9	13.79	157	13.6633	180	15.1847	159	6.11327	65	8.26195	94	5.43175	54	0.00128874	-0.938605	down	--	--	Molecular Function: hydrolase activity, hydrolyzing O-glycosyl compounds (GO:0004553);; Biological Process: carbohydrate metabolic process (GO:0005975);; Molecular Function: electron carrier activity (GO:0009055);;	--	--	--	--	Plastocyanin-like domain	--	--	--	glycoside hydrolase family 17 [Artemisia annua]	molecular function: catalytic activity (GO:0003824);; biological process: metabolic process (GO:0008152);; molecular function: electron carrier activity (GO:0009055)
evm.TU.scaffold_223.292	evm.TU.scaffold_223.292	2.03716	72	2.68866	109	2.45814	79	5.94573	193	3.57173	125	4.7331	143	0.0124219	0.824936	up	[GR]	Carbohydrate transport and metabolism;; General function prediction only	Molecular Function: hydrolase activity (GO:0016787);;	--	--	[R]	General function prediction only	Haloacid dehalogenase-like hydrolase	CBBY-like protein OS=Arabidopsis thaliana OX=3702 GN=CBBY PE=1 SV=1	--	--	CBBY-like protein [Lactuca sativa]	molecular function: catalytic activity (GO:0003824)
evm.TU.scaffold_2387.287	evm.TU.scaffold_2387.287	46.2005	428	41.1475	442	43.9788	375	3.9807	35	3.32264	31	5.48477	44	3.54e-43	-2.93452	down	--	--	Biological Process: lipid transport (GO:0006869);; Molecular Function: lipid binding (GO:0008289);;	--	--	--	--	Protease inhibitor/seed storage/LTP family	Non-specific lipid-transfer protein OS=Helianthus annuus OX=4232 PE=3 SV=1	--	--	lipid transfer protein 3 [Artemisia annua]	biological process: single-organism process (GO:0044699);; biological process: localization (GO:0051179);; molecular function: binding (GO:0005488)
Chrysanthemum_x_morifolium_newGene_22876	--	7.78584	118	19.5932	301	12.2522	147	2.04777	29	6.46561	87	3.8268	50	0.00437246	-1.12652	down	--	--	--	--	--	--	--	--	--	--	--	--	--
evm.TU.scaffold_11125.79	evm.TU.scaffold_11125.79	146.715	4706	131.055	4869	79.9278	2358	67.5011	2006	55.1588	1762	64.9273	1791	0.0011355	-0.840375	down	[H]	Coenzyme transport and metabolism	Molecular Function: methionine adenosyltransferase activity (GO:0004478);; Molecular Function: ATP binding (GO:0005524);; Biological Process: S-adenosylmethionine biosynthetic process (GO:0006556);; Biological Process: one-carbon metabolic process (GO:0006730);; Molecular Function: metal ion binding (GO:0046872);;	--	--	[H]	Coenzyme transport and metabolism	S-adenosylmethionine synthetase, C-terminal domain	S-adenosylmethionine synthase 3 OS=Solanum lycopersicum OX=4081 GN=SAM3 PE=2 SV=1	--	--	S-adenosylmethionine synthase 3 [Artemisia annua]	molecular function: catalytic activity (GO:0003824);; molecular function: binding (GO:0005488);; biological process: metabolic process (GO:0008152);; biological process: cellular process (GO:0009987);; biological process: single-organism process (GO:0044699)
evm.TU.scaffold_909.183	evm.TU.scaffold_909.183	5.7465	135	8.13225	220	8.01026	173	3.75737	82	4.18309	98	4.60159	93	0.02736	-0.696703	down	--	--	Molecular Function: DNA binding (GO:0003677);;	--	--	--	--	ZF-HD protein dimerisation region	Zinc-finger homeodomain protein 2 OS=Arabidopsis thaliana OX=3702 GN=ZHD1 PE=1 SV=1	--	--	Homeodomain-like protein [Artemisia annua]	molecular function: binding (GO:0005488)
evm.TU.scaffold_453.169	evm.TU.scaffold_453.169	17.3384	347	11.7609	272	9.71012	179	6.54456	121	3.27548	66	5.87834	101	0.00253218	-1.04385	down	--	--	--	--	--	--	--	--	--	--	--	hypothetical protein CTI12_AA351450 [Artemisia annua]	--
evm.TU.scaffold_381.138	evm.TU.scaffold_381.138	4.29256	145	4.04139	158	4.59999	143	2.25793	71	2.04784	69	2.26688	66	0.00244222	-0.854438	down	--	--	Molecular Function: DNA binding (GO:0003677);; Molecular Function: transcription factor activity, sequence-specific DNA binding (GO:0003700);; Cellular Component: CCAAT-binding factor complex (GO:0016602);;	--	--	[K]	Transcription	CCAAT-binding transcription factor (CBF-B/NF-YA) subunit B	Nuclear transcription factor Y subunit A-1 OS=Arabidopsis thaliana OX=3702 GN=NFYA1 PE=2 SV=1	--	--	CCAAT-binding factor, conserved site-containing protein [Artemisia annua]	molecular function: binding (GO:0005488);; molecular function: nucleic acid binding transcription factor activity (GO:0001071);; biological process: biological regulation (GO:0065007);; cellular component: cell (GO:0005623);; cellular component: macromolecular complex (GO:0032991);; cellular component: organelle (GO:0043226);; cellular component: organelle part (GO:0044422);; cellular component: …
evm.TU.scaffold_1281.232	evm.TU.scaffold_1281.232	0.250933	8	0.307186	12	0.247323	8	4.97627	146	3.71128	117	4.03869	110	2.21e-22	2.827	up	[Q]	Secondary metabolites biosynthesis, transport and catabolism	Biological Process: fatty acid biosynthetic process (GO:0006633);; Cellular Component: integral component of membrane (GO:0016021);; Molecular Function: transferase activity, transferring acyl groups other than amino-acyl groups (GO:0016747);;	--	--	--	--	FAE1/Type III polyketide synthase-like protein	3-ketoacyl-CoA synthase 4 OS=Arabidopsis thaliana OX=3702 GN=KCS4 PE=2 SV=1	--	--	3-ketoacyl-CoA synthase 17 [Artemisia annua]	biological process: metabolic process (GO:0008152);; biological process: cellular process (GO:0009987);; biological process: single-organism process (GO:0044699);; cellular component: membrane (GO:0016020);; cellular component: membrane part (GO:0044425);; molecular function: catalytic activity (GO:0003824)
evm.TU.scaffold_5723.42	evm.TU.scaffold_5723.42	0.307992	9	0.116227	4	0.247742	7	1.01389	27	1.39807	40	0.854035	21	0.0125964	1.12324	up	--	--	Molecular Function: serine-type carboxypeptidase activity (GO:0004185);;	--	--	[OE]	Posttranslational modification, protein turnover, chaperones;; Amino acid transport and metabolism	Serine carboxypeptidase	Serine carboxypeptidase-like 18 OS=Arabidopsis thaliana OX=3702 GN=SCPL18 PE=2 SV=2	--	--	serine carboxypeptidase-like 16 [Artemisia annua]	molecular function: catalytic activity (GO:0003824);; biological process: metabolic process (GO:0008152)
evm.TU.scaffold_320.389	evm.TU.scaffold_320.389	2654.09	30251	2330.46	30763	1472.01	15432	1113.72	11761	1172.73	13307	796.875	7811	0.00021576	-0.952283	down	--	--	Molecular Function: cysteine-type endopeptidase inhibitor activity (GO:0004869);;	--	--	--	--	Aspartic acid proteinase inhibitor	--	--	--	proteinase inhibitor I25 [Artemisia annua]	molecular function: molecular function regulator (GO:0098772);; biological process: biological regulation (GO:0065007)
Chrysanthemum_x_morifolium_newGene_48232	--	3.0624	75	1.15383	33	1.91409	44	9.16958	137	3.94936	85	6.26608	109	0.0441302	0.881531	up	--	--	Cellular Component: Golgi apparatus (GO:0005794);; Biological Process: intracellular protein transport (GO:0006886);; Molecular Function: protein transporter activity (GO:0008565);; Biological Process: vesicle-mediated transport (GO:0016192);; Cellular Component: clathrin adaptor complex (GO:0030131);;	K12391|0|bvg:104897418|K12391 AP-1 complex subunit gamma-1 | (RefSeq) AP-1 complex subunit gamma-2-like	--	[U]	Intracellular trafficking, secretion, and vesicular transport	Adaptin N terminal region	AP-1 complex subunit gamma-2 OS=Arabidopsis thaliana OX=3702 GN=At1g60070 PE=1 SV=2	U	Intracellular trafficking, secretion, and vesicular transport	AP-1 complex subunit gamma-2-like [Lactuca sativa]	cellular component: cell (GO:0005623);; cellular component: organelle (GO:0043226);; cellular component: cell part (GO:0044464);; biological process: localization (GO:0051179);; molecular function: transporter activity (GO:0005215);; cellular component: membrane (GO:0016020);; cellular component: macromolecular complex (GO:0032991);; cellular component: membrane part (GO:0044425)
evm.TU.scaffold_1333.496	evm.TU.scaffold_1333.496	2.22395	67	4.0609	141	4.2142	117	0.611423	17	1.30851	40	0.898343	24	0.000426373	-1.31068	down	[H]	Coenzyme transport and metabolism	Molecular Function: methyltransferase activity (GO:0008168);; Biological Process: methylation (GO:0032259);;	--	--	[IR]	Lipid transport and metabolism;; General function prediction only	Methyltransferase domain	Probable tocopherol O-methyltransferase, chloroplastic OS=Oryza sativa subsp. japonica OX=39947 GN=VTE4 PE=2 SV=1	--	--	gamma-tocopherol methyltransferase [Artemisia annua]	molecular function: catalytic activity (GO:0003824);; biological process: metabolic process (GO:0008152)
evm.TU.scaffold_1226.35	evm.TU.scaffold_1226.35	0.175176	6	0.339425	12	0.204763	6	1.48307	42	0.774552	24	1.32982	35	0.0049166	1.21482	up	[S]	Function unknown	Molecular Function: oxidoreductase activity (GO:0016491);;	--	--	[S]	Function unknown	Saccharopine dehydrogenase NADP binding domain	Probable mitochondrial saccharopine dehydrogenase-like oxidoreductase At5g39410 OS=Arabidopsis thaliana OX=3702 GN=At5g39410 PE=1 SV=2	--	--	saccharopine dehydrogenase-like oxidoreductase [Artemisia annua]	molecular function: catalytic activity (GO:0003824)
Chrysanthemum_x_morifolium_newGene_14354	--	5.45573	90	5.17842	96	5.49833	83	2.69835	33	3.18298	55	0.8821	14	0.0487262	-0.888677	down	[R]	General function prediction only	Cellular Component: cytosol (GO:0005829);; Biological Process: methylation (GO:0032259);; Molecular Function: caffeoyl-CoA O-methyltransferase activity (GO:0042409);;	K00588|2.06034e-103|mdm:103400753|K00588 caffeoyl-CoA O-methyltransferase [EC:2.1.1.104] | (RefSeq) probable caffeoyl-CoA O-methyltransferase At4g26220	Phenylalanine metabolism (ko00360);; Phenylpropanoid biosynthesis (ko00940);; Flavonoid biosynthesis (ko00941);; Stilbenoid, diarylheptanoid and gingerol biosynthesis (ko00945)	[Q]	Secondary metabolites biosynthesis, transport and catabolism	O-methyltransferase;; Methyltransferase domain;; Methyltransferase domain;; Protein-L-isoaspartate(D-aspartate) O-methyltransferase (PCMT)	Probable caffeoyl-CoA O-methyltransferase At4g26220 OS=Arabidopsis thaliana OX=3702 GN=At4g26220 PE=2 SV=1	S	Function unknown	probable caffeoyl-CoA O-methyltransferase At4g26220 [Helianthus annuus]	cellular component: cell (GO:0005623);; cellular component: cell part (GO:0044464);; biological process: metabolic process (GO:0008152);; molecular function: catalytic activity (GO:0003824)
evm.TU.scaffold_965.256	evm.TU.scaffold_965.256	0.055137	2	0.143677	6	0	0	2.33663	74	2.38024	81	1.69526	50	3.55e-13	2.50125	up	--	--	Molecular Function: transferase activity, transferring acyl groups other than amino-acyl groups (GO:0016747);;	--	--	--	--	Transferase family	BAHD acyltransferase DCR OS=Arabidopsis thaliana OX=3702 GN=DCR PE=2 SV=1	--	--	Chloramphenicol acetyltransferase-like domain-containing protein [Artemisia annua]	molecular function: catalytic activity (GO:0003824)
evm.TU.scaffold_9199.1	evm.TU.scaffold_9199.1	75.2215	1056	76.7505	1248	63.2905	817	39.2385	511	49.8798	697	47.4015	572	0.00196253	-0.623279	down	--	--	Cellular Component: nucleus (GO:0005634);; Biological Process: regulation of transcription, DNA-templated (GO:0006355);; Biological Process: auxin-activated signaling pathway (GO:0009734);;	--	--	--	--	AUX/IAA family	Auxin-responsive protein IAA7 OS=Arabidopsis thaliana OX=3702 GN=IAA7 PE=1 SV=1	--	--	auxin-induced protein AUX28 [Artemisia annua]	cellular component: cell (GO:0005623);; cellular component: organelle (GO:0043226);; cellular component: cell part (GO:0044464);; biological process: biological regulation (GO:0065007);; biological process: cellular process (GO:0009987);; biological process: signaling (GO:0023052);; biological process: single-organism process (GO:0044699);; biological process: response to stimulus (GO:0050896)
evm.TU.scaffold_234.129	evm.TU.scaffold_234.129	5.51505	128	4.39445	118	4.4063	94	8.72019	188	10.5298	243	11.0632	221	0.000169177	0.95548	up	[R]	General function prediction only	Cellular Component: cellular_component (GO:0005575);; Cellular Component: cell (GO:0005623);; Cellular Component: plasma membrane (GO:0005886);; Biological Process: response to stress (GO:0006950);; Biological Process: response to oxidative stress (GO:0006979);; Biological Process: biological_process (GO:0008150);; Biological Process: response to inorganic substance (GO:0010035);; Biological Proc…	--	--	--	--	NmrA-like family	Isoflavone reductase homolog A622-like OS=Nicotiana tabacum OX=4097 GN=A622L PE=2 SV=1	--	--	isoflavone reductase [Artemisia annua]	cellular component: cell (GO:0005623);; cellular component: membrane (GO:0016020);; cellular component: cell part (GO:0044464);; biological process: response to stimulus (GO:0050896)
evm.TU.scaffold_268.149	evm.TU.scaffold_268.149	4.0745	139	3.28479	130	2.87384	91	1.49748	48	2.02141	69	1.24445	37	0.0150992	-0.879471	down	[QV]	Secondary metabolites biosynthesis, transport and catabolism;; Defense mechanisms	Molecular Function: iron ion binding (GO:0005506);; Molecular Function: oxidoreductase activity, acting on paired donors, with incorporation or reduction of molecular oxygen (GO:0016705);; Molecular Function: heme binding (GO:0020037);;	--	--	[QI]	Secondary metabolites biosynthesis, transport and catabolism;; Lipid transport and metabolism	Cytochrome P450	Cytochrome P450 94A1 OS=Vicia sativa OX=3908 GN=CYP94A1 PE=2 SV=2	--	--	hypothetical protein E3N88_33871 [Mikania micrantha]	molecular function: binding (GO:0005488);; molecular function: catalytic activity (GO:0003824);; biological process: metabolic process (GO:0008152);; biological process: single-organism process (GO:0044699)
evm.TU.scaffold_asm16_new.3078	evm.TU.scaffold_asm16_new.3078	1.34359	47	1.6713	67	2.24658	72	4.12602	133	4.32569	150	3.77873	113	0.000778914	1.02182	up	--	--	Molecular Function: shikimate O-hydroxycinnamoyltransferase activity (GO:0047172);;	--	--	--	--	Transferase family	BAHD acyltransferase DCR OS=Arabidopsis thaliana OX=3702 GN=DCR PE=2 SV=1	--	--	shikimate O-hydroxycinnamoyltransferase [Chrysanthemum x morifolium]	molecular function: catalytic activity (GO:0003824)
Chrysanthemum_x_morifolium_newGene_64904	--	3.4926	107	4.83695	170	5.35335	149	2.48915	70	1.86816	57	2.02099	54	0.00468842	-0.910509	down	--	--	Cellular Component: membrane (GO:0016020);;	K12275|3.38108e-09|vvi:100267343|K12275 translocation protein SEC62 | (RefSeq) uncharacterized LOC100267343	Protein export (ko03060);; Protein processing in endoplasmic reticulum (ko04141)	--	--	--	--	U	Intracellular trafficking, secretion, and vesicular transport	uncharacterized protein LOC111903826 [Lactuca sativa]	cellular component: membrane (GO:0016020)
evm.TU.scaffold_209.357	evm.TU.scaffold_209.357	1.81819	40	2.26315	57	2.28376	46	4.6643	94	3.09823	67	5.90893	111	0.0366659	0.838776	up	--	--	Cellular Component: nucleus (GO:0005634);; Biological Process: regulation of transcription, DNA-templated (GO:0006355);; Biological Process: auxin-activated signaling pathway (GO:0009734);;	--	--	--	--	AUX/IAA family	Auxin-responsive protein IAA18 OS=Arabidopsis thaliana OX=3702 GN=IAA18 PE=1 SV=2	--	--	PB1 domain, AUX/IAA protein [Artemisia annua]	cellular component: cell (GO:0005623);; cellular component: organelle (GO:0043226);; cellular component: cell part (GO:0044464);; biological process: biological regulation (GO:0065007);; biological process: cellular process (GO:0009987);; biological process: signaling (GO:0023052);; biological process: single-organism process (GO:0044699);; biological process: response to stimulus (GO:0050896)
evm.TU.scaffold_598.864	evm.TU.scaffold_598.864	4.19865	236	6.02855	391	6.54795	338	9.36683	486	12.0933	674	8.86094	427	0.00300782	0.765223	up	[L]	Replication, recombination and repair	Molecular Function: DNA binding (GO:0003677);; Molecular Function: DNA helicase activity (GO:0003678);; Molecular Function: ATP binding (GO:0005524);; Cellular Component: nucleus (GO:0005634);; Biological Process: DNA replication initiation (GO:0006270);; Cellular Component: MCM complex (GO:0042555);;	--	--	[L]	Replication, recombination and repair	MCM P-loop domain	DNA replication licensing factor MCM4 OS=Oryza sativa subsp. japonica OX=39947 GN=MCM4 PE=3 SV=2	--	--	minichromosome maintenance (MCM2/3/5) family protein [Artemisia annua]	molecular function: binding (GO:0005488);; molecular function: catalytic activity (GO:0003824);; cellular component: cell (GO:0005623);; cellular component: organelle (GO:0043226);; cellular component: cell part (GO:0044464);; biological process: metabolic process (GO:0008152);; biological process: cellular process (GO:0009987);; cellular component: macromolecular complex (GO:0032991)
Chrysanthemum_x_morifolium_newGene_33802	--	3.16172	33	2.51477	31	2.15553	21	0.368225	4	1.01634	11	0.241118	3	0.0374334	-0.994609	down	--	--	Molecular Function: RNA polymerase II regulatory region sequence-specific DNA binding (GO:0000977);; Molecular Function: transcription factor activity, sequence-specific DNA binding (GO:0003700);; Cellular Component: nucleus (GO:0005634);; Biological Process: regulation of transcription from RNA polymerase II promoter (GO:0006357);;	--	--	[L]	Replication, recombination and repair	--	Zinc finger BED domain-containing protein RICESLEEPER 3 OS=Oryza sativa subsp. japonica OX=39947 GN=Os05g0583200 PE=2 SV=1	S	Function unknown	zinc finger BED domain-containing protein RICESLEEPER 2-like [Helianthus annuus]	molecular function: binding (GO:0005488);; molecular function: nucleic acid binding transcription factor activity (GO:0001071);; biological process: biological regulation (GO:0065007);; cellular component: cell (GO:0005623);; cellular component: organelle (GO:0043226);; cellular component: cell part (GO:0044464)
evm.TU.scaffold_1692.529	evm.TU.scaffold_1692.529	0.928861	21	0.670617	18	0.783911	16	1.66848	35	2.70157	60	2.26195	43	0.0254473	0.976322	up	[C]	Energy production and conversion	Molecular Function: FMN binding (GO:0010181);; Molecular Function: oxidoreductase activity (GO:0016491);;	--	--	[CR]	Energy production and conversion;; General function prediction only	NADH:flavin oxidoreductase / NADH oxidase family	12-oxophytodienoate reductase 2 OS=Arabidopsis thaliana OX=3702 GN=OPR2 PE=1 SV=2	--	--	12-oxophytodienoate reductase 11 [Artemisia annua]	molecular function: binding (GO:0005488);; molecular function: catalytic activity (GO:0003824)
evm.TU.scaffold_1660.249	evm.TU.scaffold_1660.249	4.15952	232	3.75578	243	2.07924	107	1.69918	88	0.999454	56	1.23276	60	0.0034193	-1.04724	down	--	--	Molecular Function: voltage-gated potassium channel activity (GO:0005249);; Cellular Component: integral component of membrane (GO:0016021);;	--	--	[PT]	Inorganic ion transport and metabolism;; Signal transduction mechanisms	Ion transport protein	Protein CNGC15c OS=Medicago truncatula OX=3880 GN=CNGC15C PE=1 SV=1	--	--	IQ motif, EF-hand binding site, Potassium channel, voltage-dependent, EAG/ELK/ERG [Artemisia annua]	molecular function: transporter activity (GO:0005215);; biological process: cellular process (GO:0009987);; biological process: single-organism process (GO:0044699);; biological process: localization (GO:0051179);; biological process: biological regulation (GO:0065007);; cellular component: membrane (GO:0016020);; cellular component: membrane part (GO:0044425)
evm.TU.scaffold_218.92	evm.TU.scaffold_218.92	4.58048	229	5.27241	306	6.57461	303	8.78398	407	10.8355	539	8.33991	359	0.00461046	0.697382	up	[L]	Replication, recombination and repair	Molecular Function: DNA binding (GO:0003677);; Molecular Function: DNA helicase activity (GO:0003678);; Molecular Function: ATP binding (GO:0005524);; Cellular Component: nucleus (GO:0005634);; Biological Process: DNA replication initiation (GO:0006270);; Biological Process: cell cycle (GO:0007049);; Cellular Component: MCM complex (GO:0042555);;	--	--	[L]	Replication, recombination and repair	MCM P-loop domain	DNA replication licensing factor MCM7 OS=Oryza sativa subsp. indica OX=39946 GN=MCM7 PE=3 SV=1	--	--	DNA replication licensing factor MCM7 [Cynara cardunculus var. scolymus]	molecular function: binding (GO:0005488);; molecular function: catalytic activity (GO:0003824);; cellular component: cell (GO:0005623);; cellular component: organelle (GO:0043226);; cellular component: cell part (GO:0044464);; biological process: metabolic process (GO:0008152);; biological process: cellular process (GO:0009987);; biological process: single-organism process (GO:0044699);; cellular…
evm.TU.scaffold_468.296	evm.TU.scaffold_468.296	4.64598	113	5.68309	160	5.22117	117	7.81266	176	10.3906	251	10.5089	220	0.00370283	0.781774	up	[I]	Lipid transport and metabolism	Molecular Function: enoyl-[acyl-carrier-protein] reductase (NADH) activity (GO:0004318);; Biological Process: fatty acid biosynthetic process (GO:0006633);;	--	--	[R]	General function prediction only	Enoyl-(Acyl carrier protein) reductase	Enoyl-[acyl-carrier-protein] reductase [NADH], chloroplastic OS=Brassica napus OX=3708 PE=1 SV=2	--	--	enoyl-ACP reductase 1 [Artemisia annua]	molecular function: catalytic activity (GO:0003824);; biological process: metabolic process (GO:0008152);; biological process: single-organism process (GO:0044699);; biological process: cellular process (GO:0009987)
evm.TU.scaffold_662.99	evm.TU.scaffold_662.99	12.9596	512	16.471	753	13.4562	489	24.9665	913	23.9288	940	21.9351	744	0.000127708	0.679549	up	[H]	Coenzyme transport and metabolism	Molecular Function: uroporphyrinogen decarboxylase activity (GO:0004853);; Biological Process: protoporphyrinogen IX biosynthetic process (GO:0006782);;	--	--	[H]	Coenzyme transport and metabolism	Uroporphyrinogen decarboxylase (URO-D)	Uroporphyrinogen decarboxylase 1, chloroplastic OS=Arabidopsis thaliana OX=3702 GN=HEME1 PE=2 SV=2	--	--	uroporphyrinogen decarboxylase [Artemisia annua]	molecular function: catalytic activity (GO:0003824);; biological process: metabolic process (GO:0008152);; biological process: cellular process (GO:0009987)
Chrysanthemum_x_morifolium_newGene_11769	--	3.25667	76	5.3436	144	4.16587	89	1.22021	27	1.80031	42	1.0353	21	0.000574673	-1.22243	down	--	--	--	--	--	--	--	--	--	--	--	--	--
evm.TU.scaffold_1746.38	evm.TU.scaffold_1746.38	145.552	2180	237.32	4117	254.343	3504	126.047	1750	159.599	2380	110.918	1429	0.0348438	-0.61279	down	--	--	--	--	--	--	--	Protein of unknown function, DUF538	--	--	--	hypothetical protein CTI12_AA005270 [Artemisia annua]	--
Chrysanthemum_x_morifolium_newGene_68477	--	3.63043	153	4.08972	197	5.74081	214	1.60335	62	1.91752	92	2.08272	80	0.00149752	-0.963287	down	--	--	--	--	--	--	--	--	--	--	--	--	--
evm.TU.scaffold_940.203	evm.TU.scaffold_940.203	4.75524	99	3.643	88	3.1241	60	1.41083	28	1.83248	38	1.29349	24	0.00913359	-0.997296	down	--	--	--	--	--	--	--	Ferritin-like domain	Desiccation-related protein PCC13-62 OS=Craterostigma plantagineum OX=4153 PE=2 SV=1	--	--	hypothetical protein CTI12_AA423800 [Artemisia annua]	--
evm.TU.scaffold_46.18	evm.TU.scaffold_46.18	1.81154	116	1.53024	113	1.26029	74	2.86306	169	2.77784	176	3.02887	166	0.00656737	0.787669	up	[O]	Posttranslational modification, protein turnover, chaperones	Molecular Function: metalloendopeptidase activity (GO:0004222);; Molecular Function: ATP binding (GO:0005524);; Cellular Component: integral component of membrane (GO:0016021);;	--	--	[O]	Posttranslational modification, protein turnover, chaperones	ATPase family associated with various cellular activities (AAA)	Probable inactive ATP-dependent zinc metalloprotease FTSHI 1, chloroplastic OS=Arabidopsis thaliana OX=3702 GN=FTSHI1 PE=1 SV=1	--	--	ftsH extracellular protease family [Artemisia annua]	molecular function: catalytic activity (GO:0003824);; biological process: metabolic process (GO:0008152);; molecular function: binding (GO:0005488);; cellular component: membrane (GO:0016020);; cellular component: membrane part (GO:0044425)
evm.TU.scaffold_957.24	evm.TU.scaffold_957.24	2.74863	89	2.61572	98	1.93005	57	0.961574	29	0.721248	24	0.40247	12	0.00099141	-1.24405	down	--	--	Molecular Function: DNA binding (GO:0003677);; Cellular Component: nucleus (GO:0005634);;	--	--	[K]	Transcription	Myb-like DNA-binding domain	Transcription factor MYB93 OS=Arabidopsis thaliana OX=3702 GN=MYB93 PE=1 SV=1	--	--	homeodomain-like protein [Artemisia annua]	molecular function: binding (GO:0005488);; cellular component: cell (GO:0005623);; cellular component: organelle (GO:0043226);; cellular component: cell part (GO:0044464)
evm.TU.scaffold_286.32	evm.TU.scaffold_286.32	11.2724	366	8.70487	328	6.2062	186	6.31416	190	4.15677	135	3.61517	101	0.0489193	-0.740508	down	[R]	General function prediction only	Molecular Function: O-methyltransferase activity (GO:0008171);; Biological Process: methylation (GO:0032259);;	--	--	[Q]	Secondary metabolites biosynthesis, transport and catabolism	O-methyltransferase	Caffeoyl-CoA O-methyltransferase OS=Populus tremuloides OX=3693 PE=2 SV=1	--	--	caffeoyl-CoA O-methyltransferase [Artemisia annua]	molecular function: catalytic activity (GO:0003824);; biological process: metabolic process (GO:0008152)
evm.TU.scaffold_200.14	evm.TU.scaffold_200.14	9.25234	528	9.61265	635	11.0024	577	18.3097	968	18.1974	1033	19.1666	940	8.82e-10	0.859818	up	--	--	Molecular Function: protein binding (GO:0005515);;	--	--	[R]	General function prediction only	Leucine Rich repeat	EIN3-binding F-box protein 2 OS=Arabidopsis thaliana OX=3702 GN=EBF2 PE=1 SV=1	--	--	F-box domain, Leucine-rich repeat domain, L domain-like protein [Artemisia annua]	molecular function: binding (GO:0005488)
evm.TU.scaffold_11180.81	evm.TU.scaffold_11180.81	18.6939	167	22.866	236	23.9734	196	10.7314	89	13.3184	118	11.513	88	0.00399311	-0.784242	down	--	--	--	--	--	[A]	RNA processing and modification	--	--	--	--	hypothetical protein CTI12_AA501420 [Artemisia annua]	--
evm.TU.scaffold_11771.374	evm.TU.scaffold_11771.374	4.53076	73	3.2633	61	3.03816	45	12.779	190	9.05525	145	9.23427	128	2.9e-05	1.24273	up	--	--	--	--	--	--	--	Hydrophobic seed protein	14 kDa proline-rich protein DC2.15 OS=Daucus carota OX=4039 PE=2 SV=1	--	--	14 kDa proline-rich protein DC2.15 [Artemisia annua]	--
Chrysanthemum_x_morifolium_newGene_88906	--	4.84116	84	5.06847	102	4.4964	72	1.0549	18	2.75832	48	0.831751	13	0.0147395	-1.04742	down	--	--	Molecular Function: RNA binding (GO:0003723);; Biological Process: RNA splicing (GO:0008380);; Biological Process: response to organic substance (GO:0010033);; Cellular Component: intracellular part (GO:0044424);; Biological Process: single-organism process (GO:0044699);;	K12882|8.53963e-76|cic:CICLE_v100142372m|K12882 nuclear cap-binding protein subunit 1 | (RefSeq) hypothetical protein	RNA transport (ko03013);; mRNA surveillance pathway (ko03015);; Spliceosome (ko03040)	[A]	RNA processing and modification	--	Nuclear cap-binding protein subunit 1 OS=Arabidopsis thaliana OX=3702 GN=ABH1 PE=1 SV=2	A	RNA processing and modification	nuclear cap-binding protein subunit 1 [Helianthus annuus]	molecular function: binding (GO:0005488);; biological process: metabolic process (GO:0008152);; biological process: cellular process (GO:0009987);; biological process: response to stimulus (GO:0050896);; cellular component: cell (GO:0005623);; cellular component: cell part (GO:0044464);; biological process: single-organism process (GO:0044699)
evm.TU.scaffold_518.347	evm.TU.scaffold_518.347	0.738821	22	0.849557	29	1.1306	31	7.54587	204	4.04233	118	6.1391	154	2.24e-12	2.06092	up	[IQ]	Lipid transport and metabolism;; Secondary metabolites biosynthesis, transport and catabolism	Molecular Function: transferase activity (GO:0016740);;	--	--	[IQ]	Lipid transport and metabolism;; Secondary metabolites biosynthesis, transport and catabolism	Beta-ketoacyl synthase, N-terminal domain	3-oxoacyl-[acyl-carrier-protein] synthase I, chloroplastic OS=Arabidopsis thaliana OX=3702 GN=KAS1 PE=1 SV=2	--	--	3-oxoacyl-[acyl-carrier-protein] synthase 2 [Artemisia annua]	molecular function: catalytic activity (GO:0003824)
Chrysanthemum_x_morifolium_newGene_28266	--	20.3046	163	55.6819	518	14.7569	109	5.73247	43	5.26628	43	7.83895	55	8.81e-05	-1.47452	down	--	--	--	--	--	--	--	--	--	--	--	--	--
evm.TU.scaffold_1292.73	evm.TU.scaffold_1292.73	6.8153	143	6.82565	166	7.64132	147	11.1052	216	11.5123	240	11.1379	201	0.0125243	0.610011	up	[J]	Translation, ribosomal structure and biogenesis	Molecular Function: structural constituent of ribosome (GO:0003735);; Cellular Component: ribosome (GO:0005840);; Biological Process: translation (GO:0006412);;	--	--	[J]	Translation, ribosomal structure and biogenesis	Ribosomal protein S8e	40S ribosomal protein S8 OS=Oryza sativa subsp. japonica OX=39947 GN=RPS8 PE=2 SV=2	--	--	40S ribosomal protein S8-2 [Lactuca sativa]	molecular function: structural molecule activity (GO:0005198);; cellular component: cell (GO:0005623);; cellular component: macromolecular complex (GO:0032991);; cellular component: organelle (GO:0043226);; cellular component: cell part (GO:0044464);; biological process: metabolic process (GO:0008152);; biological process: cellular process (GO:0009987)
Chrysanthemum_x_morifolium_newGene_72867	--	3.26484	153	2.73793	148	3.04891	130	6.82559	292	4.57034	212	6.13784	244	0.00196253	0.830712	up	--	--	Biological Process: transport (GO:0006810);; Cellular Component: membrane (GO:0016020);;	--	--	[E]	Amino acid transport and metabolism	POT family;; POT family	Protein NRT1/ PTR FAMILY 2.7 OS=Arabidopsis thaliana OX=3702 GN=NPF2.7 PE=1 SV=1	E	Amino acid transport and metabolism	Major facilitator superfamily domain, general substrate transporter, partial [Cynara cardunculus var. scolymus]	biological process: localization (GO:0051179);; cellular component: membrane (GO:0016020)
evm.TU.scaffold_9738.61	evm.TU.scaffold_9738.61	0.906505	113	1.33455	192	1.07046	123	1.87493	216	1.97209	244	1.73497	185	0.0192022	0.664238	up	--	--	--	--	--	[R]	General function prediction only	Tetratricopeptide repeat	Protein TSS OS=Arabidopsis thaliana OX=3702 GN=TSS PE=1 SV=1	--	--	tetratricopeptide repeat (TPR)-like superfamily protein [Artemisia annua]	--
evm.TU.scaffold_1142.269	evm.TU.scaffold_1142.269	0.821249	15	1.61697	34	0.760683	13	3.72002	61	2.6962	48	4.06505	62	0.00862058	1.09724	up	[S]	Function unknown	Cellular Component: extracellular region (GO:0005576);;	--	--	[S]	Function unknown	Cysteine-rich secretory protein family	Basic form of pathogenesis-related protein 1 OS=Nicotiana tabacum OX=4097 PE=3 SV=1	--	--	basic pathogenesis-related protein 1 [Artemisia annua]	cellular component: extracellular region (GO:0005576)
evm.TU.scaffold_551.28_evm.TU.scaffold_551.29	evm.TU.scaffold_551.28_evm.TU.scaffold_551.29	1.69213	71	1.63348	80	1.15742	45	4.19946	164	3.17219	133	5.0404	182	6.79e-05	1.19784	up	--	--	Cellular Component: integral component of membrane (GO:0016021);;	--	--	[E]	Amino acid transport and metabolism	Transmembrane amino acid transporter protein	Amino acid transporter AVT1C OS=Arabidopsis thaliana OX=3702 GN=AVT1C PE=1 SV=1	--	--	Amino acid transporter, transmembrane [Artemisia annua]	cellular component: membrane (GO:0016020);; cellular component: membrane part (GO:0044425)
evm.TU.scaffold_1629.36	evm.TU.scaffold_1629.36	0.451314	20	0.636598	32	0.658113	26	1.28735	51	1.45778	62	1.39477	51	0.0292833	0.898378	up	--	--	Cellular Component: integral component of membrane (GO:0016021);;	--	--	[R]	General function prediction only	Domain of unknown function	--	--	--	Ankyrin repeat-containing protein [Artemisia annua]	cellular component: membrane (GO:0016020);; cellular component: membrane part (GO:0044425)
evm.TU.scaffold_704.302	evm.TU.scaffold_704.302	326.695	5075	317.267	5708	191.335	2734	667.838	9611	430.341	6655	431.956	5770	0.0100589	0.756531	up	--	--	Cellular Component: cell wall (GO:0005618);; Molecular Function: manganese ion binding (GO:0030145);; Molecular Function: nutrient reservoir activity (GO:0045735);; Cellular Component: apoplast (GO:0048046);;	--	--	--	--	Cupin	Germin-like protein subfamily 3 member 3 OS=Arabidopsis thaliana OX=3702 GN=GER3 PE=1 SV=1	--	--	auxin-binding protein ABP19a [Artemisia annua]	cellular component: cell (GO:0005623);; cellular component: cell part (GO:0044464);; molecular function: binding (GO:0005488);; molecular function: nutrient reservoir activity (GO:0045735);; cellular component: extracellular region (GO:0005576)
Chrysanthemum_x_morifolium_newGene_92814	--	884.644	12322	668.987	10792	660.654	8464	357.977	4620	385.156	5341	424.827	5089	8.78e-07	-0.875935	down	--	--	--	--	--	--	--	--	--	--	--	--	--
evm.TU.scaffold_10036.59	evm.TU.scaffold_10036.59	3.5424	72	5.71196	135	3.82253	72	8.23556	155	7.76754	158	8.04668	141	0.0250886	0.739752	up	--	--	--	--	--	[R]	General function prediction only	Ankyrin repeats (3 copies)	Ankyrin repeat domain-containing protein EMB506, chloroplastic OS=Arabidopsis thaliana OX=3702 GN=EMB506 PE=1 SV=1	--	--	ankyrin repeat-containing domain-containing protein [Artemisia annua]	--
evm.TU.scaffold_1656.31	evm.TU.scaffold_1656.31	7.06727	208	6.88721	235	7.36385	199	3.54994	97	4.0266	118	3.9195	100	0.000842428	-0.806317	down	--	--	Cellular Component: integral component of membrane (GO:0016021);;	--	--	--	--	Neprosin	--	--	--	hypothetical protein CTI12_AA023510 [Artemisia annua]	cellular component: membrane (GO:0016020);; cellular component: membrane part (GO:0044425)
evm.TU.scaffold_10472.23	evm.TU.scaffold_10472.23	7.21594	194	7.21657	225	7.7795	192	25.8305	643	9.32777	250	15.596	360	0.00741448	0.946735	up	[G]	Carbohydrate transport and metabolism	Molecular Function: fructose-bisphosphate aldolase activity (GO:0004332);; Biological Process: glycolytic process (GO:0006096);;	--	--	[G]	Carbohydrate transport and metabolism	Fructose-bisphosphate aldolase class-I	Fructose-bisphosphate aldolase 2, chloroplastic OS=Arabidopsis thaliana OX=3702 GN=FBA2 PE=1 SV=2	--	--	fructose-bisphosphate aldolase, class-I [Artemisia annua]	molecular function: catalytic activity (GO:0003824);; biological process: metabolic process (GO:0008152);; biological process: cellular process (GO:0009987);; biological process: single-organism process (GO:0044699)
evm.TU.scaffold_8571.70	evm.TU.scaffold_8571.70	38.807	242	48.241	349	17.9129	103	13.298	77	10.7276	67	8.83798	48	0.000473976	-1.24752	down	--	--	--	--	--	--	--	--	--	--	--	--	--
Chrysanthemum_x_morifolium_newGene_16831	--	1.52067	36	1.90116	71	2.05976	62	0.877507	23	0.354857	7	0.55772	16	0.03018	-1.00384	down	--	--	--	--	--	--	--	--	VAN3-binding protein OS=Arabidopsis thaliana OX=3702 GN=VAB PE=1 SV=1	S	Function unknown	VAN3-binding protein-like isoform X1 [Helianthus annuus]	--
evm.TU.scaffold_1136.57	evm.TU.scaffold_1136.57	149.387	2272	136.119	2397	165.47	2314	65.6689	925	79.0259	1197	85.332	1116	1.23e-08	-0.924834	down	--	--	Biological Process: lipid transport (GO:0006869);; Molecular Function: lipid binding (GO:0008289);;	--	--	--	--	Protease inhibitor/seed storage/LTP family	Non-specific lipid-transfer protein OS=Helianthus annuus OX=4232 PE=3 SV=1	--	--	lipid transfer protein-4 [Artemisia annua]	biological process: single-organism process (GO:0044699);; biological process: localization (GO:0051179);; molecular function: binding (GO:0005488)
evm.TU.scaffold_1337.36	evm.TU.scaffold_1337.36	1.89775	69	2.41019	101	2.95637	99	4.82731	162	4.45395	160	4.60538	143	0.00680288	0.805039	up	--	--	--	--	--	--	--	--	IRK-interacting protein OS=Arabidopsis thaliana OX=3702 GN=IRKI PE=1 SV=1	--	--	hypothetical protein CTI12_AA126370 [Artemisia annua]	--
Chrysanthemum_x_morifolium_newGene_77183	--	0.399381	4	1.54041	16	0.531348	5	6.72943	56	6.3753	57	2.65618	21	0.00284956	1.2763	up	[T]	Signal transduction mechanisms	Molecular Function: protein serine/threonine kinase activity (GO:0004674);; Molecular Function: ATP binding (GO:0005524);; Biological Process: protein phosphorylation (GO:0006468);;	--	--	[D]	Cell cycle control, cell division, chromosome partitioning	--	Probable serine/threonine-protein kinase At1g54610 OS=Arabidopsis thaliana OX=3702 GN=At1g54610 PE=1 SV=1	T	Signal transduction mechanisms	probable serine/threonine-protein kinase At1g54610 [Lactuca sativa]	molecular function: catalytic activity (GO:0003824);; biological process: metabolic process (GO:0008152);; biological process: cellular process (GO:0009987);; molecular function: binding (GO:0005488)
Chrysanthemum_x_morifolium_newGene_61194	--	2.36123	28	3.8	52	2.91374	32	0.981728	11	0.496967	6	0.57613	6	0.0075791	-1.16867	down	--	--	--	--	--	--	--	--	Wall-associated receptor kinase 1 OS=Arabidopsis thaliana OX=3702 GN=WAK1 PE=1 SV=2	--	--	putative EGF-like domain-containing protein [Helianthus annuus]	--
evm.TU.scaffold_2361.147	evm.TU.scaffold_2361.147	0.144203	5	0.171025	7	0.630069	19	1.27449	38	1.58817	51	1.5822	44	0.00773737	1.17221	up	--	--	--	--	--	--	--	--	--	--	--	hypothetical protein CTI12_AA000660 [Artemisia annua]	--
evm.TU.scaffold_9086.113	evm.TU.scaffold_9086.113	8.67765	311	6.72306	279	4.84682	160	13.6242	452	12.2857	438	12.6428	390	0.00351479	0.80911	up	--	--	Cellular Component: cellular_component (GO:0005575);; Cellular Component: intracellular (GO:0005622);; Cellular Component: cell (GO:0005623);; Cellular Component: cytoplasm (GO:0005737);; Biological Process: biological_process (GO:0008150);; Cellular Component: chloroplast (GO:0009507);; Cellular Component: plastid stroma (GO:0009532);; Cellular Component: plastid (GO:0009536);; Cellular Componen…	--	--	--	--	Rubisco Assembly chaperone C-terminal domain	Rubisco accumulation factor 1.1, chloroplastic OS=Arabidopsis thaliana OX=3702 GN=RAF1.1 PE=1 SV=1	--	--	hypothetical protein CTI12_AA218740 [Artemisia annua]	cellular component: cell (GO:0005623);; cellular component: cell part (GO:0044464);; cellular component: organelle (GO:0043226);; cellular component: organelle part (GO:0044422);; biological process: cellular process (GO:0009987);; biological process: cellular component organization or biogenesis (GO:0071840)
evm.TU.scaffold_10243.51_evm.TU.scaffold_10243.52	evm.TU.scaffold_10243.51_evm.TU.scaffold_10243.52	7.6395	308	6.11014	285	4.76095	177	13.4759	503	9.73319	391	10.0536	349	0.0116465	0.735198	up	[GI]	Carbohydrate transport and metabolism;; Lipid transport and metabolism	Molecular Function: enzyme inhibitor activity (GO:0004857);; Cellular Component: extracellular region (GO:0005576);; Cellular Component: cell wall (GO:0005618);; Cellular Component: integral component of membrane (GO:0016021);; Molecular Function: pectinesterase activity (GO:0030599);; Biological Process: cell wall modification (GO:0042545);; Molecular Function: aspartyl esterase activity (GO:004…	--	--	--	--	Pectinesterase	Pectinesterase/pectinesterase inhibitor U1 OS=Solanum lycopersicum OX=4081 GN=PMEU1 PE=2 SV=1	--	--	pectinesterase/pectinesterase inhibitor U1 [Artemisia annua]	molecular function: molecular function regulator (GO:0098772);; biological process: biological regulation (GO:0065007);; cellular component: extracellular region (GO:0005576);; cellular component: cell (GO:0005623);; cellular component: cell part (GO:0044464);; cellular component: membrane (GO:0016020);; cellular component: membrane part (GO:0044425);; molecular function: catalytic activity (GO:0…
evm.TU.scaffold_308.502	evm.TU.scaffold_308.502	17.545	359	12.8178	303	11.3418	213	8.15458	155	9.19771	187	7.8045	137	0.0390214	-0.647006	down	--	--	--	--	--	--	--	--	--	--	--	--	--
evm.TU.scaffold_1225.83	evm.TU.scaffold_1225.83	3.30766	71	2.62135	66	4.18041	83	0.811749	17	1.18319	26	1.30058	24	0.00247771	-1.14995	down	--	--	Molecular Function: transcription factor activity, sequence-specific DNA binding (GO:0003700);; Cellular Component: nucleus (GO:0005634);; Molecular Function: sequence-specific DNA binding (GO:0043565);;	--	--	--	--	WRKY DNA -binding domain	Probable WRKY transcription factor 56 OS=Arabidopsis thaliana OX=3702 GN=WRKY56 PE=1 SV=1	--	--	WRKY domain-containing protein [Artemisia annua]	molecular function: nucleic acid binding transcription factor activity (GO:0001071);; biological process: biological regulation (GO:0065007);; cellular component: cell (GO:0005623);; cellular component: organelle (GO:0043226);; cellular component: cell part (GO:0044464);; molecular function: binding (GO:0005488)
Chrysanthemum_x_morifolium_newGene_78904	--	14.8571	513	37.8826	839	64.236	1129	8.07736	272	6.36794	231	11.7871	362	0.000616063	-1.11261	down	--	--	Molecular Function: copper ion binding (GO:0005507);; Cellular Component: cytochrome b6f complex (GO:0009512);; Cellular Component: photosystem I (GO:0009522);; Cellular Component: chloroplast thylakoid membrane (GO:0009535);; Biological Process: photosynthesis (GO:0015979);; Cellular Component: integral component of membrane (GO:0016021);; Biological Process: cytochrome complex assembly (GO:0017…	K02640|1.9766e-22|mtr:MTR_4g050840|K02640 cytochrome b6-f complex subunit 5 | (RefSeq) cytochrome b6-F complex subunit 5	Photosynthesis (ko00195)	--	--	--	Photosystem I reaction center subunit IX OS=Lactuca sativa OX=4236 GN=psaJ PE=3 SV=1	D	Cell cycle control, cell division, chromosome partitioning	cytochrome b6-F complex subunit 5 [Medicago truncatula]	molecular function: binding (GO:0005488);; cellular component: cell (GO:0005623);; cellular component: macromolecular complex (GO:0032991);; cellular component: cell part (GO:0044464);; cellular component: membrane (GO:0016020);; cellular component: membrane part (GO:0044425);; cellular component: organelle (GO:0043226);; cellular component: organelle part (GO:0044422);; biological process: metab…
evm.TU.scaffold_455.1	evm.TU.scaffold_455.1	1.10978	47	1.44849	70	1.08122	42	2.45429	95	2.35479	98	2.19536	79	0.0335907	0.764696	up	--	--	--	--	--	[T]	Signal transduction mechanisms	Apoptosis inhibitory protein 5 (API5)	Apoptosis inhibitor 5-like protein API5 OS=Oryza sativa subsp. japonica OX=39947 GN=API5 PE=1 SV=1	--	--	apoptosis inhibitor 5 [Artemisia annua]	--
evm.TU.scaffold_3975.5	evm.TU.scaffold_3975.5	9.36911	244	5.3518	162	2.59739	63	2.05849	50	1.53861	40	2.35257	53	0.0152632	-1.03716	down	[O]	Posttranslational modification, protein turnover, chaperones	Molecular Function: cysteine-type peptidase activity (GO:0008234);;	--	--	[O]	Posttranslational modification, protein turnover, chaperones	Papain family cysteine protease	Cysteine protease XCP1 OS=Arabidopsis thaliana OX=3702 GN=XCP1 PE=1 SV=1	--	--	peptidase C1A [Artemisia annua]	molecular function: catalytic activity (GO:0003824);; biological process: metabolic process (GO:0008152)
evm.TU.scaffold_6083.295	evm.TU.scaffold_6083.295	0.867975	65	0.917963	80	1.08137	75	2.26671	157	1.9599	146	1.7487	112	0.0019435	0.903816	up	[K]	Transcription	Molecular Function: DNA binding (GO:0003677);; Molecular Function: DNA-directed 5'-3' RNA polymerase activity (GO:0003899);; Biological Process: transcription, DNA-templated (GO:0006351);;	--	--	[KL]	Transcription;; Replication, recombination and repair	DNA-dependent RNA polymerase	DNA-directed RNA polymerase 3B, chloroplastic OS=Nicotiana tabacum OX=4097 GN=RPOT3-TOM PE=2 SV=2	--	--	DNA-directed RNA polymerase 3B protein [Artemisia annua]	molecular function: binding (GO:0005488);; molecular function: catalytic activity (GO:0003824);; biological process: metabolic process (GO:0008152);; biological process: cellular process (GO:0009987)
evm.TU.scaffold_6312.85	evm.TU.scaffold_6312.85	4.04744	135	3.75745	145	3.53235	108	6.75412	208	5.45861	181	5.91304	169	0.0375941	0.599685	up	[J]	Translation, ribosomal structure and biogenesis	Molecular Function: ATP binding (GO:0005524);; Molecular Function: GTP binding (GO:0005525);; Cellular Component: cytoplasm (GO:0005737);; Molecular Function: ATPase activity (GO:0016887);; Molecular Function: ribosome binding (GO:0043022);; Molecular Function: ribosomal large subunit binding (GO:0043023);;	--	--	[R]	General function prediction only	Protein of unknown function (DUF933)	Obg-like ATPase 1 OS=Oryza sativa subsp. japonica OX=39947 GN=YCHF1 PE=1 SV=1	--	--	uncharacterized protein LOC112500596 isoform X1 [Cynara cardunculus var. scolymus]	molecular function: binding (GO:0005488);; cellular component: cell (GO:0005623);; cellular component: cell part (GO:0044464);; molecular function: catalytic activity (GO:0003824)
evm.TU.scaffold_1348.239	evm.TU.scaffold_1348.239	4.28566	174	3.6029	169	4.62636	173	2.2774	86	1.52711	62	2.60983	91	0.0138307	-0.81453	down	--	--	Molecular Function: DNA binding (GO:0003677);; Cellular Component: nucleus (GO:0005634);; Biological Process: regulation of transcription, DNA-templated (GO:0006355);;	--	--	--	--	Dof domain, zinc finger	Dof zinc finger protein DOF4.6 OS=Arabidopsis thaliana OX=3702 GN=DOF4.6 PE=2 SV=2	--	--	DOF transcription factor 11, partial [Chrysanthemum x morifolium]	molecular function: binding (GO:0005488);; cellular component: cell (GO:0005623);; cellular component: organelle (GO:0043226);; cellular component: cell part (GO:0044464);; biological process: biological regulation (GO:0065007)
evm.TU.scaffold_8776.76	evm.TU.scaffold_8776.76	5.03788	125	7.55227	218	4.50546	103	10.8287	249	10.5984	262	10.8788	233	0.00651746	0.793097	up	--	--	Cellular Component: integral component of membrane (GO:0016021);;	--	--	[S]	Function unknown	PQ loop repeat	--	--	--	probable vacuolar amino acid transporter YPQ3 [Cynara cardunculus var. scolymus]	cellular component: membrane (GO:0016020);; cellular component: membrane part (GO:0044425)
evm.TU.scaffold_1182.245	evm.TU.scaffold_1182.245	5.85097	75	7.09275	106	6.24357	74	16.2391	193	11.1697	143	23.8168	263	0.000429263	1.13446	up	--	--	Biological Process: DNA methylation (GO:0006306);; Molecular Function: methyltransferase activity (GO:0008168);;	--	--	--	--	--	--	--	--	domains rearranged methyltransferase 2 [Artemisia annua]	biological process: metabolic process (GO:0008152);; biological process: cellular process (GO:0009987);; molecular function: catalytic activity (GO:0003824)
evm.TU.scaffold_10628.27	evm.TU.scaffold_10628.27	15.4348	508	13.621	519	13.6677	414	29.0194	884	17.13	561	22.1234	626	0.0317482	0.602492	up	[IQR]	Lipid transport and metabolism;; Secondary metabolites biosynthesis, transport and catabolism;; General function prediction only	Cellular Component: chloroplast (GO:0009507);; Biological Process: photosynthesis (GO:0015979);; Biological Process: chlorophyll biosynthetic process (GO:0015995);; Molecular Function: protochlorophyllide reductase activity (GO:0016630);;	--	--	[Q]	Secondary metabolites biosynthesis, transport and catabolism	short chain dehydrogenase	Protochlorophyllide reductase, chloroplastic OS=Daucus carota OX=4039 GN=POR1 PE=2 SV=1	--	--	protochlorophyllide reductase, chloroplastic [Lactuca sativa]	cellular component: cell (GO:0005623);; cellular component: organelle (GO:0043226);; cellular component: cell part (GO:0044464);; biological process: metabolic process (GO:0008152);; biological process: cellular process (GO:0009987);; biological process: single-organism process (GO:0044699);; molecular function: catalytic activity (GO:0003824)
Chrysanthemum_x_morifolium_newGene_37489	--	42.5628	429	37.5563	438	7.64391	71	8.99006	85	8.57535	86	8.38942	72	0.00874051	-1.12032	down	--	--	--	--	--	--	--	--	--	--	--	--	--
Chrysanthemum_x_morifolium_newGene_11294	--	1.13655	54	1.15068	64	2.2344	98	3.01165	133	5.21227	247	2.58958	106	0.0209833	0.933701	up	--	--	--	--	--	[J]	Translation, ribosomal structure and biogenesis	--	Cold shock protein 1 OS=Arabidopsis thaliana OX=3702 GN=CSP1 PE=1 SV=1	L	Replication, recombination and repair	uncharacterized protein LOC110895146 isoform X1 [Helianthus annuus]	--
Chrysanthemum_x_morifolium_newGene_82359	--	30.7492	212	27.7107	227	87.1285	573	17.3621	112	16.1568	117	21.773	130	0.0146365	-0.999752	down	--	--	Cellular Component: mitochondrial respiratory chain complex I (GO:0005747);;	--	--	--	--	--	--	S	Function unknown	uncharacterized protein LOC111893462 [Lactuca sativa]	cellular component: cell (GO:0005623);; cellular component: membrane (GO:0016020);; cellular component: macromolecular complex (GO:0032991);; cellular component: organelle (GO:0043226);; cellular component: organelle part (GO:0044422);; cellular component: membrane part (GO:0044425);; cellular component: cell part (GO:0044464)
Chrysanthemum_x_morifolium_newGene_30420	--	4.29749	37	4.83482	48	3.74678	30	1.05226	9	1.44698	13	1.2466	10	0.0191653	-1.04327	down	--	--	--	--	--	--	--	--	--	--	--	--	--
evm.TU.scaffold_604.78	evm.TU.scaffold_604.78	26.5862	1315	26.3851	1512	20.1449	917	15.9574	732	16.181	797	15.6057	664	0.00340629	-0.586373	down	[GI]	Carbohydrate transport and metabolism;; Lipid transport and metabolism	Molecular Function: enzyme inhibitor activity (GO:0004857);; Cellular Component: integral component of membrane (GO:0016021);; Molecular Function: pectinesterase activity (GO:0030599);; Biological Process: cell wall modification (GO:0042545);; Molecular Function: aspartyl esterase activity (GO:0045330);; Biological Process: pectin catabolic process (GO:0045490);;	--	--	--	--	Pectinesterase	Probable pectinesterase/pectinesterase inhibitor 61 OS=Arabidopsis thaliana OX=3702 GN=PME61 PE=2 SV=1	--	--	Pectinesterase, active site-containing protein [Artemisia annua]	molecular function: molecular function regulator (GO:0098772);; biological process: biological regulation (GO:0065007);; cellular component: membrane (GO:0016020);; cellular component: membrane part (GO:0044425);; molecular function: catalytic activity (GO:0003824);; biological process: cellular process (GO:0009987);; biological process: cellular component organization or biogenesis (GO:0071840);…
evm.TU.scaffold_8403.39	evm.TU.scaffold_8403.39	420.599	2804	338.273	2612	228.317	1400	167.427	1034	193.736	1286	94.3175	541	0.00295439	-0.941822	down	--	--	--	--	--	--	--	Thaumatin family	Thaumatin-like protein OS=Actinidia chinensis var. chinensis OX=1590841 GN=TLP PE=1 SV=2	--	--	thaumatin-like protein 1 [Artemisia annua]	--
Chrysanthemum_x_morifolium_newGene_25365	--	7.59994	176	9.0799	246	10.8496	215	6.0879	132	5.28254	112	4.91259	102	0.0229907	-0.658447	down	--	--	Cellular Component: plasma membrane (GO:0005886);; Molecular Function: zinc ion binding (GO:0008270);; Cellular Component: integral component of membrane (GO:0016021);; Molecular Function: cellulose synthase (UDP-forming) activity (GO:0016760);; Biological Process: cellulose biosynthetic process (GO:0030244);; Biological Process: cell wall organization (GO:0071555);;	K10999|2.55436e-27|csv:101205724|K10999 cellulose synthase A [EC:2.4.1.12] | (RefSeq) cellulose synthase A catalytic subunit 1 [UDP-forming]	--	--	--	--	Cellulose synthase A catalytic subunit 1 [UDP-forming] OS=Arabidopsis thaliana OX=3702 GN=CESA1 PE=1 SV=1	M	Cell wall/membrane/envelope biogenesis	hypothetical protein TanjilG_24131 [Lupinus angustifolius]	cellular component: cell (GO:0005623);; cellular component: membrane (GO:0016020);; cellular component: cell part (GO:0044464);; molecular function: binding (GO:0005488);; cellular component: membrane part (GO:0044425);; molecular function: catalytic activity (GO:0003824);; biological process: metabolic process (GO:0008152);; biological process: cellular process (GO:0009987);; biological process:…
evm.TU.scaffold_980.88	evm.TU.scaffold_980.88	21.4546	456	24.7212	609	21.0433	412	42.5035	837	33.7062	714	29.213	534	0.0116465	0.594835	up	--	--	Cellular Component: photosystem I (GO:0009522);; Cellular Component: photosystem II (GO:0009523);; Cellular Component: chloroplast thylakoid membrane (GO:0009535);; Biological Process: photosynthesis, light harvesting (GO:0009765);; Cellular Component: integral component of membrane (GO:0016021);; Molecular Function: chlorophyll binding (GO:0016168);; Biological Process: protein-chromophore linka…	--	--	--	--	Chlorophyll A-B binding protein	Chlorophyll a-b binding protein CP26, chloroplastic OS=Arabidopsis thaliana OX=3702 GN=LHCB5 PE=1 SV=1	--	--	chlorophyll a-b binding protein CP26, chloroplastic [Artemisia annua]	cellular component: cell (GO:0005623);; cellular component: membrane (GO:0016020);; cellular component: macromolecular complex (GO:0032991);; cellular component: membrane part (GO:0044425);; cellular component: cell part (GO:0044464);; cellular component: organelle (GO:0043226);; cellular component: organelle part (GO:0044422);; biological process: metabolic process (GO:0008152);; biological proc…
evm.TU.scaffold_968.9	evm.TU.scaffold_968.9	0.825463	8	0	0	2.32387	19	6.92732	56	5.24042	46	8.01494	60	0.029815	1.00663	up	[G]	Carbohydrate transport and metabolism	Molecular Function: ribose-5-phosphate isomerase activity (GO:0004751);; Biological Process: pentose-phosphate shunt, non-oxidative branch (GO:0009052);; Molecular Function: transferase activity (GO:0016740);;	--	--	[G]	Carbohydrate transport and metabolism	--	Probable ribose-5-phosphate isomerase 4, chloroplastic OS=Arabidopsis thaliana OX=3702 GN=RPI4 PE=2 SV=1	--	--	nagB/RpiA/CoA transferase-like superfamily protein [Artemisia annua]	molecular function: catalytic activity (GO:0003824);; biological process: metabolic process (GO:0008152);; biological process: cellular process (GO:0009987);; biological process: single-organism process (GO:0044699)
evm.TU.scaffold_3500.60	evm.TU.scaffold_3500.60	13.2823	217	19.1107	362	18.7905	283	8.16678	124	12.6913	207	6.29069	89	0.03462	-0.755129	down	--	--	Cellular Component: cell wall (GO:0005618);; Molecular Function: manganese ion binding (GO:0030145);; Molecular Function: nutrient reservoir activity (GO:0045735);; Cellular Component: apoplast (GO:0048046);;	--	--	--	--	Cupin	Putative germin-like protein 2-1 OS=Oryza sativa subsp. japonica OX=39947 GN=Os02g0491600 PE=3 SV=1	--	--	germin, RmlC-like cupin domain protein [Artemisia annua]	cellular component: cell (GO:0005623);; cellular component: cell part (GO:0044464);; molecular function: binding (GO:0005488);; molecular function: nutrient reservoir activity (GO:0045735);; cellular component: extracellular region (GO:0005576)
Chrysanthemum_x_morifolium_newGene_101933	--	4.89117	62	4.61676	58	6.69523	97	1.27121	19	3.55048	36	0.722422	9	0.02573	-1.01626	down	--	--	Cellular Component: integral component of membrane (GO:0016021);;	--	--	--	--	--	--	S	Function unknown	beta-d-xylosidase 1 [Quercus suber]	cellular component: membrane (GO:0016020);; cellular component: membrane part (GO:0044425)
evm.TU.scaffold_72.66	evm.TU.scaffold_72.66	0.906449	48	3.60172	217	2.58328	124	4.93981	238	7.09382	367	5.55211	248	0.0222979	0.945822	up	[E]	Amino acid transport and metabolism	Cellular Component: cytoplasm (GO:0005737);; Biological Process: L-phenylalanine catabolic process (GO:0006559);; Biological Process: cinnamic acid biosynthetic process (GO:0009800);; Molecular Function: phenylalanine ammonia-lyase activity (GO:0045548);;	--	--	[Q]	Secondary metabolites biosynthesis, transport and catabolism	Aromatic amino acid lyase	Phenylalanine ammonia-lyase 3 OS=Petroselinum crispum OX=4043 GN=PAL3 PE=2 SV=1	--	--	phenylalanine ammonia-lyase [Chrysanthemum boreale]	cellular component: cell (GO:0005623);; cellular component: cell part (GO:0044464);; biological process: metabolic process (GO:0008152);; biological process: cellular process (GO:0009987);; biological process: single-organism process (GO:0044699);; molecular function: catalytic activity (GO:0003824)
evm.TU.scaffold_1693.191	evm.TU.scaffold_1693.191	2.62256	39	1.52991	26	2.31633	32	0.468233	7	0.587774	9	0.092574	2	0.0124965	-1.12526	down	--	--	Molecular Function: electron carrier activity (GO:0009055);; Cellular Component: integral component of membrane (GO:0016021);;	--	--	--	--	Plastocyanin-like domain	--	--	--	cupredoxin [Artemisia annua]	molecular function: electron carrier activity (GO:0009055);; cellular component: membrane (GO:0016020);; cellular component: membrane part (GO:0044425)
Chrysanthemum_x_morifolium_newGene_25022	--	3.65095	67	1.98196	42	2.50138	42	0.716652	13	0.743276	14	0.844154	14	0.00877434	-1.11525	down	--	--	Molecular Function: transporter activity (GO:0005215);; Biological Process: oligopeptide transport (GO:0006857);; Cellular Component: integral component of membrane (GO:0016021);;	K14638|2.08771e-140|sot:102606337|K14638 solute carrier family 15 (peptide/histidine transporter), member 3/4 | (RefSeq) protein NRT1/ PTR FAMILY 6.3-like	--	[E]	Amino acid transport and metabolism	--	Protein NRT1/ PTR FAMILY 6.3 OS=Arabidopsis thaliana OX=3702 GN=NPF6.3 PE=1 SV=1	E	Amino acid transport and metabolism	protein NRT1/ PTR FAMILY 6.3-like [Helianthus annuus]	molecular function: transporter activity (GO:0005215);; biological process: localization (GO:0051179);; cellular component: membrane (GO:0016020);; cellular component: membrane part (GO:0044425)
evm.TU.scaffold_1819.204	evm.TU.scaffold_1819.204	7.02728	100	8.86764	146	6.56467	86	4.12383	54	3.46493	49	4.1938	51	0.0270052	-0.783252	down	--	--	Biological Process: metal ion transport (GO:0030001);; Molecular Function: metal ion binding (GO:0046872);;	--	--	[P]	Inorganic ion transport and metabolism	Heavy-metal-associated domain	Heavy metal-associated isoprenylated plant protein 26 OS=Arabidopsis thaliana OX=3702 GN=HIPP26 PE=1 SV=1	--	--	farnesylated protein 6 [Artemisia annua]	biological process: localization (GO:0051179);; molecular function: binding (GO:0005488)
evm.TU.scaffold_asm3_new.1877	evm.TU.scaffold_asm3_new.1877	1.86044	44	1.89233	52	0.664685	15	0.0614	2	0.085	2	0.474723	10	0.0210349	-1.05124	down	[Q]	Secondary metabolites biosynthesis, transport and catabolism	Molecular Function: oxidoreductase activity (GO:0016491);; Molecular Function: metal ion binding (GO:0046872);;	--	--	[QR]	Secondary metabolites biosynthesis, transport and catabolism;; General function prediction only	non-haem dioxygenase in morphine synthesis N-terminal	Probable 2-oxoglutarate-dependent dioxygenase At5g05600 OS=Arabidopsis thaliana OX=3702 GN=At5g05600 PE=2 SV=1	--	--	Isopenicillin N synthase [Artemisia annua]	molecular function: catalytic activity (GO:0003824);; molecular function: binding (GO:0005488)
evm.TU.scaffold_3813.26	evm.TU.scaffold_3813.26	0.426924	5	1.90477	22	1.88333	17	3.51049	31	6.93465	66	12.4317	102	0.00476116	1.22371	up	--	--	Biological Process: lipid transport (GO:0006869);; Molecular Function: lipid binding (GO:0008289);;	--	--	--	--	Protease inhibitor/seed storage/LTP family	Non-specific lipid-transfer protein OS=Helianthus annuus OX=4232 PE=3 SV=1	--	--	lipid transfer protein 1 [Artemisia annua]	biological process: single-organism process (GO:0044699);; biological process: localization (GO:0051179);; molecular function: binding (GO:0005488)
evm.TU.scaffold_1581.161	evm.TU.scaffold_1581.161	22.9735	110	42.0348	233	21.6766	96	3.88359	18	6.77099	33	10.2366	43	0.000113892	-1.40899	down	--	--	--	--	--	--	--	--	--	--	--	hypothetical protein CTI12_AA217680 [Artemisia annua]	--
evm.TU.scaffold_10817.114	evm.TU.scaffold_10817.114	1.58671	78	1.68734	96	1.77355	80	3.09996	141	2.33189	114	3.40444	144	0.0412157	0.687428	up	[G]	Carbohydrate transport and metabolism	Biological Process: carbohydrate metabolic process (GO:0005975);; Molecular Function: pullulanase activity (GO:0051060);;	--	--	[G]	Carbohydrate transport and metabolism	Pullulanase N2 domain	Pullulanase 1, chloroplastic OS=Arabidopsis thaliana OX=3702 GN=PU1 PE=1 SV=2	--	--	limit dextrinase [Artemisia annua]	biological process: metabolic process (GO:0008152);; molecular function: catalytic activity (GO:0003824)
Chrysanthemum_x_morifolium_newGene_45634	--	1.91433	68	1.2557	52	0.720332	24	7.05605	227	4.18608	146	4.76464	143	1.37e-05	1.47295	up	[QV]	Secondary metabolites biosynthesis, transport and catabolism;; Defense mechanisms	Cellular Component: membrane (GO:0016020);; Molecular Function: oxidoreductase activity (GO:0016491);; Molecular Function: metal ion binding (GO:0046872);;	--	--	[QI]	Secondary metabolites biosynthesis, transport and catabolism;; Lipid transport and metabolism	Cytochrome P450	Alkane hydroxylase MAH1 OS=Arabidopsis thaliana OX=3702 GN=CYP96A15 PE=2 SV=1	Q	Secondary metabolites biosynthesis, transport and catabolism	cytochrome P450 [Cynara cardunculus var. scolymus]	cellular component: membrane (GO:0016020);; molecular function: catalytic activity (GO:0003824);; molecular function: binding (GO:0005488)
evm.TU.scaffold_7126.28	evm.TU.scaffold_7126.28	5.83101	111	6.64836	147	8.25825	145	3.37733	60	3.6454	69	3.68672	61	0.0115815	-0.807699	down	--	--	Biological Process: response to acid chemical (GO:0001101);; Molecular Function: molecular_function (GO:0003674);; Molecular Function: binding (GO:0005488);; Molecular Function: protein binding (GO:0005515);; Cellular Component: cellular_component (GO:0005575);; Cellular Component: intracellular (GO:0005622);; Cellular Component: cell (GO:0005623);; Cellular Component: nucleus (GO:0005634);; Cell…	--	--	--	--	Polyketide cyclase / dehydrase and lipid transport	Abscisic acid receptor PYL2 OS=Arabidopsis thaliana OX=3702 GN=PYL2 PE=1 SV=1	--	--	Polyketide cyclase/dehydrase [Artemisia annua]	biological process: response to stimulus (GO:0050896);; molecular function: binding (GO:0005488);; cellular component: cell (GO:0005623);; cellular component: cell part (GO:0044464);; cellular component: organelle (GO:0043226);; biological process: cellular process (GO:0009987);; biological process: biological regulation (GO:0065007);; biological process: multicellular organismal process (GO:0032…
evm.TU.scaffold_9340.598	evm.TU.scaffold_9340.598	2.59762	86	2.08758	80	2.48509	76	1.023	32	1.02494	34	0.958095	28	0.00701208	-0.970852	down	--	--	Biological Process: protein glycosylation (GO:0006486);; Cellular Component: integral component of membrane (GO:0016021);; Molecular Function: transferase activity, transferring glycosyl groups (GO:0016757);;	--	--	[GMW]	Carbohydrate transport and metabolism;; Cell wall/membrane/envelope biogenesis;; Extracellular structures	Exostosin family	Xyloglucan galactosyltransferase XLT2 OS=Arabidopsis thaliana OX=3702 GN=XLT2 PE=1 SV=1	--	--	exostosin-like protein [Artemisia annua]	biological process: metabolic process (GO:0008152);; biological process: cellular process (GO:0009987);; biological process: single-organism process (GO:0044699);; cellular component: membrane (GO:0016020);; cellular component: membrane part (GO:0044425);; molecular function: catalytic activity (GO:0003824)
evm.TU.scaffold_asm20_new.470	evm.TU.scaffold_asm20_new.470	2.88508	106	2.08458	88	2.12386	72	4.26877	145	3.65463	133	4.52177	142	0.0459736	0.682253	up	[R]	General function prediction only	Biological Process: mitochondrial respiratory chain complex I assembly (GO:0032981);;	--	--	[G]	Carbohydrate transport and metabolism	Complex I intermediate-associated protein 30 (CIA30)	--	--	--	NAD(P)-binding Rossmann-fold superfamily protein [Artemisia annua]	biological process: cellular process (GO:0009987);; biological process: cellular component organization or biogenesis (GO:0071840)
evm.TU.scaffold_20.21	evm.TU.scaffold_20.21	50.6595	1441	49.5209	1631	46.7636	1223	118.251	3115	58.1387	1646	78.48	1919	0.0168911	0.696434	up	[P]	Inorganic ion transport and metabolism	Molecular Function: ferredoxin-NADP+ reductase activity (GO:0004324);; Cellular Component: chloroplast (GO:0009507);;	--	--	[C]	Energy production and conversion	Oxidoreductase NAD-binding domain	Ferredoxin--NADP reductase, leaf-type isozyme, chloroplastic OS=Nicotiana tabacum OX=4097 GN=PETH PE=2 SV=1	--	--	ferredoxin--NADP reductase, leaf isozyme [Artemisia annua]	molecular function: catalytic activity (GO:0003824);; biological process: metabolic process (GO:0008152);; biological process: single-organism process (GO:0044699);; cellular component: cell (GO:0005623);; cellular component: organelle (GO:0043226);; cellular component: cell part (GO:0044464)
evm.TU.scaffold_693.60	evm.TU.scaffold_693.60	208.006	3677	145.675	2982	117.994	1918	74.446	1219	71.7313	1262	83.9439	1276	8.06e-05	-0.941152	down	--	--	--	--	--	--	--	--	--	--	--	hypothetical protein CTI12_AA158490 [Artemisia annua]	--
evm.TU.scaffold_7511.37	evm.TU.scaffold_7511.37	1.77281	50	1.6459	54	1.56091	41	0	0	0.496641	14	0.290659	7	0.00892649	-1.15988	down	[Q]	Secondary metabolites biosynthesis, transport and catabolism	Biological Process: biosynthetic process (GO:0009058);; Molecular Function: transferase activity, transferring acyl groups other than amino-acyl groups (GO:0016747);;	--	--	--	--	Chalcone and stilbene synthases, N-terminal domain	Chalcone synthase 2 OS=Camellia sinensis OX=4442 GN=CHS2 PE=2 SV=1	--	--	chalcone synthase [Artemisia annua]	biological process: metabolic process (GO:0008152);; molecular function: catalytic activity (GO:0003824)
evm.TU.scaffold_1499.10	evm.TU.scaffold_1499.10	45.5698	1402	41.4742	1478	28.966	820	23.2927	664	25.0898	769	23.4322	620	0.0091669	-0.642039	down	--	--	Molecular Function: calcium ion binding (GO:0005509);;	--	--	[T]	Signal transduction mechanisms	EF hand	Calcium-binding protein CBP OS=Oryza sativa subsp. japonica OX=39947 GN=CBP PE=2 SV=1	--	--	calcium-binding EF-hand family protein [Artemisia annua]	molecular function: binding (GO:0005488)
evm.TU.scaffold_10595.84	evm.TU.scaffold_10595.84	14.148	208	6.7417	115	9.25126	125	0.834242	12	1.01617	15	0.200547	3	4.87e-13	-2.39996	down	--	--	--	--	--	--	--	Thaumatin family	Thaumatin-like protein 1 OS=Pyrus pyrifolia OX=3767 GN=TL1 PE=1 SV=1	--	--	thaumatin [Artemisia annua]	--
evm.TU.scaffold_1265.302	evm.TU.scaffold_1265.302	46.5962	1183	38.3141	1127	36.8302	860	114.584	2696	48.1555	1218	65.0409	1420	0.0268669	0.75408	up	--	--	Cellular Component: photosystem I (GO:0009522);; Cellular Component: photosystem II (GO:0009523);; Cellular Component: chloroplast thylakoid membrane (GO:0009535);; Biological Process: photosynthesis, light harvesting (GO:0009765);; Cellular Component: integral component of membrane (GO:0016021);; Molecular Function: chlorophyll binding (GO:0016168);; Biological Process: protein-chromophore linka…	--	--	--	--	Chlorophyll A-B binding protein	Chlorophyll a-b binding protein 13, chloroplastic OS=Solanum lycopersicum OX=4081 GN=CAB13 PE=1 SV=1	--	--	light-harvesting chlorophyll B-binding protein 3 [Artemisia annua]	cellular component: cell (GO:0005623);; cellular component: membrane (GO:0016020);; cellular component: macromolecular complex (GO:0032991);; cellular component: membrane part (GO:0044425);; cellular component: cell part (GO:0044464);; cellular component: organelle (GO:0043226);; cellular component: organelle part (GO:0044422);; biological process: metabolic process (GO:0008152);; biological proc…
evm.TU.scaffold_1573.319	evm.TU.scaffold_1573.319	11.1684	118	14.6455	179	14.0551	137	8.45721	83	8.31172	88	5.75676	53	0.048676	-0.691206	down	--	--	Biological Process: response to reactive oxygen species (GO:0000302);; Biological Process: response to acid chemical (GO:0001101);; Biological Process: regulation of response to biotic stimulus (GO:0002831);; Cellular Component: cellular_component (GO:0005575);; Cellular Component: intracellular (GO:0005622);; Cellular Component: cell (GO:0005623);; Cellular Component: nucleus (GO:0005634);; Cell…	--	--	--	--	Late embryogenesis abundant protein	Protein SENESCENCE-ASSOCIATED GENE 21, mitochondrial OS=Arabidopsis thaliana OX=3702 GN=SAG21 PE=2 SV=1	--	--	late embryogenesis abundant protein Lea5-D [Artemisia annua]	biological process: response to stimulus (GO:0050896);; biological process: biological regulation (GO:0065007);; cellular component: cell (GO:0005623);; cellular component: cell part (GO:0044464);; cellular component: organelle (GO:0043226);; biological process: cellular process (GO:0009987);; biological process: multicellular organismal process (GO:0032501);; biological process: developmental pr…
evm.TU.scaffold_9037.114	evm.TU.scaffold_9037.114	0	0	0.074466	5	0.055512	3	0.753578	34	0.586876	28	0.537784	22	0.000557856	1.41262	up	[T]	Signal transduction mechanisms	Molecular Function: phosphorelay sensor kinase activity (GO:0000155);; Molecular Function: ATP binding (GO:0005524);; Cellular Component: endoplasmic reticulum membrane (GO:0005789);; Cellular Component: integral component of membrane (GO:0016021);; Molecular Function: ethylene receptor activity (GO:0038199);; Molecular Function: metal ion binding (GO:0046872);; Molecular Function: ethylene bindi…	--	--	[T]	Signal transduction mechanisms	Response regulator receiver domain	Ethylene receptor 2 OS=Arabidopsis thaliana OX=3702 GN=ETR2 PE=1 SV=2	--	--	ethylene receptor ETR2 [Artemisia annua]	molecular function: catalytic activity (GO:0003824);; molecular function: signal transducer activity (GO:0004871);; molecular function: molecular transducer activity (GO:0060089);; biological process: metabolic process (GO:0008152);; biological process: cellular process (GO:0009987);; biological process: signaling (GO:0023052);; biological process: single-organism process (GO:0044699);; biologica…
Chrysanthemum_x_morifolium_newGene_61334	--	53.7823	398	15.4089	132	56.9047	387	7.06786	49	15.3966	114	13.5278	86	0.00298009	-1.19883	down	--	--	Molecular Function: DNA binding (GO:0003677);; Cellular Component: nucleus (GO:0005634);; Cellular Component: chromosome (GO:0005694);; Cellular Component: cytoplasm (GO:0005737);; Biological Process: DNA replication (GO:0006260);; Biological Process: base-excision repair (GO:0006284);; Biological Process: double-strand break repair (GO:0006302);; Biological Process: DNA recombination (GO:0006310…	K10730|2.1069e-10|pop:POPTR_0010s06660g|K10730 ATP-dependent DNA helicase Q4 [EC:3.6.4.12] | (RefSeq) POPTRDRAFT_886009; ATP-dependent DNA helicase family protein	--	[L]	Replication, recombination and repair	--	ATP-dependent DNA helicase Q-like 5 OS=Arabidopsis thaliana OX=3702 GN=RECQL5 PE=2 SV=2	L	Replication, recombination and repair	ATP-dependent DNA helicase Q-like 5 [Chenopodium quinoa]	molecular function: binding (GO:0005488);; cellular component: cell (GO:0005623);; cellular component: organelle (GO:0043226);; cellular component: cell part (GO:0044464);; biological process: metabolic process (GO:0008152);; biological process: cellular process (GO:0009987);; biological process: response to stimulus (GO:0050896);; molecular function: catalytic activity (GO:0003824);; biological …
evm.TU.scaffold_8820.21	evm.TU.scaffold_8820.21	3.41094	161	2.80233	154	4.3839	191	1.60513	71	1.85166	87	1.52205	62	0.0026851	-0.920704	down	[L]	Replication, recombination and repair	Molecular Function: nucleic acid binding (GO:0003676);; Molecular Function: helicase activity (GO:0004386);; Molecular Function: ATP binding (GO:0005524);;	--	--	[A]	RNA processing and modification	DEAD/DEAH box helicase	DEAD-box ATP-dependent RNA helicase 52 OS=Arabidopsis thaliana OX=3702 GN=RH52 PE=1 SV=1	--	--	helicase Cas3, CRISPR-associated, core [Artemisia annua]	molecular function: binding (GO:0005488);; molecular function: catalytic activity (GO:0003824)
evm.TU.scaffold_9043.35	evm.TU.scaffold_9043.35	6.10204	268	6.54493	332	5.06871	205	12.1107	492	7.77201	339	9.49407	358	0.0234534	0.644094	up	--	--	Molecular Function: lipid binding (GO:0008289);; Cellular Component: integral component of membrane (GO:0016021);;	--	--	[I]	Lipid transport and metabolism	START domain	--	--	--	START domain-containing protein [Artemisia annua]	molecular function: binding (GO:0005488);; cellular component: membrane (GO:0016020);; cellular component: membrane part (GO:0044425)
evm.TU.scaffold_63.257	evm.TU.scaffold_63.257	24.31	458	24.6778	538	22.1721	384	33.4593	583	44.4968	833	37.9415	614	0.00131417	0.652729	up	[J]	Translation, ribosomal structure and biogenesis	Molecular Function: structural constituent of ribosome (GO:0003735);; Cellular Component: ribosome (GO:0005840);; Biological Process: translation (GO:0006412);;	--	--	[J]	Translation, ribosomal structure and biogenesis	Ribosomal protein S8e	40S ribosomal protein S8 OS=Oryza sativa subsp. japonica OX=39947 GN=RPS8 PE=2 SV=2	--	--	40S ribosomal protein S8-like [Cynara cardunculus var. scolymus]	molecular function: structural molecule activity (GO:0005198);; cellular component: cell (GO:0005623);; cellular component: macromolecular complex (GO:0032991);; cellular component: organelle (GO:0043226);; cellular component: cell part (GO:0044464);; biological process: metabolic process (GO:0008152);; biological process: cellular process (GO:0009987)
evm.TU.scaffold_6291.80	evm.TU.scaffold_6291.80	0.419	5	0	0	0.754963	8	3.41565	36	4.79131	54	5.48247	53	7.39e-05	1.57093	up	--	--	Cellular Component: integral component of membrane (GO:0016021);;	--	--	--	--	--	--	--	--	alcohol dehydrogenase 7 [Artemisia annua]	cellular component: membrane (GO:0016020);; cellular component: membrane part (GO:0044425)
evm.TU.scaffold_1042.216	evm.TU.scaffold_1042.216	0	0	0	0	0	0	1.23505	40	1.14033	40	1.51241	45	1.88e-11	2.38457	up	[QV]	Secondary metabolites biosynthesis, transport and catabolism;; Defense mechanisms	Molecular Function: monooxygenase activity (GO:0004497);; Molecular Function: iron ion binding (GO:0005506);; Molecular Function: oxidoreductase activity, acting on paired donors, with incorporation or reduction of molecular oxygen (GO:0016705);; Molecular Function: heme binding (GO:0020037);;	--	--	[Q]	Secondary metabolites biosynthesis, transport and catabolism	Cytochrome P450	Costunolide synthase OS=Tanacetum parthenium OX=127999 GN=CYP71BL2 PE=1 SV=1	--	--	costunolide [Tanacetum cinerariifolium]	molecular function: catalytic activity (GO:0003824);; biological process: metabolic process (GO:0008152);; biological process: single-organism process (GO:0044699);; molecular function: binding (GO:0005488)
Chrysanthemum_x_morifolium_newGene_81051	--	1.77022	25	1.74718	29	1.53458	20	7.00575	91	4.2204	59	4.42563	53	0.00237768	1.15477	up	--	--	Cellular Component: integral component of membrane (GO:0016021);; Molecular Function: serine O-acyltransferase activity (GO:0016412);; Molecular Function: hydrolase activity, acting on ester bonds (GO:0016788);;	--	--	--	--	GDSL-like Lipase/Acylhydrolase	GDSL esterase/lipase 1 OS=Arabidopsis thaliana OX=3702 GN=GLIP1 PE=1 SV=1	S	Function unknown	GDSL esterase/lipase 1-like isoform X1 [Lactuca sativa]	cellular component: membrane (GO:0016020);; cellular component: membrane part (GO:0044425);; molecular function: catalytic activity (GO:0003824)
evm.TU.scaffold_922.102	evm.TU.scaffold_922.102	15.372	453	16.0772	549	12.6748	344	30.4457	831	21.26	624	23.668	600	0.00268413	0.701455	up	[G]	Carbohydrate transport and metabolism	Molecular Function: ribose-5-phosphate isomerase activity (GO:0004751);; Biological Process: glutamine metabolic process (GO:0006541);; Biological Process: pentose-phosphate shunt, non-oxidative branch (GO:0009052);;	--	--	[G]	Carbohydrate transport and metabolism	Ribose 5-phosphate isomerase A (phosphoriboisomerase A)	Probable ribose-5-phosphate isomerase 3, chloroplastic OS=Arabidopsis thaliana OX=3702 GN=RPI3 PE=1 SV=1	--	--	Ribose 5-phosphate isomerase, type A [Artemisia annua]	molecular function: catalytic activity (GO:0003824);; biological process: metabolic process (GO:0008152);; biological process: cellular process (GO:0009987);; biological process: single-organism process (GO:0044699)
evm.TU.scaffold_asm13_new.219	evm.TU.scaffold_asm13_new.219	6.00452	463	4.381	391	5.21164	369	8.38488	598	9.03846	693	8.76311	580	0.000906269	0.690528	up	[T]	Signal transduction mechanisms	Molecular Function: phosphorelay sensor kinase activity (GO:0000155);; Biological Process: regulation of transcription, DNA-templated (GO:0006355);; Biological Process: detection of visible light (GO:0009584);; Biological Process: red, far-red light phototransduction (GO:0009585);; Molecular Function: photoreceptor activity (GO:0009881);; Biological Process: protein-tetrapyrrole linkage (GO:00170…	--	--	--	--	Phytochrome region	Phytochrome A1 OS=Nicotiana tabacum OX=4097 GN=PHYA1 PE=3 SV=1	--	--	phytochrome A [Chrysanthemum lavandulifolium]	molecular function: catalytic activity (GO:0003824);; molecular function: signal transducer activity (GO:0004871);; molecular function: molecular transducer activity (GO:0060089);; biological process: metabolic process (GO:0008152);; biological process: cellular process (GO:0009987);; biological process: signaling (GO:0023052);; biological process: single-organism process (GO:0044699);; biologica…
evm.TU.scaffold_2990.22	evm.TU.scaffold_2990.22	33.9975	680	44.4108	1029	36.9208	680	74.9435	1389	78.7713	1569	81.0981	1395	8.44e-11	0.973203	up	[O]	Posttranslational modification, protein turnover, chaperones	Molecular Function: peptidyl-prolyl cis-trans isomerase activity (GO:0003755);; Biological Process: protein folding (GO:0006457);;	--	--	[O]	Posttranslational modification, protein turnover, chaperones	Cyclophilin type peptidyl-prolyl cis-trans isomerase/CLD	Photosynthetic NDH subunit of lumenal location 5, chloroplastic OS=Arabidopsis thaliana OX=3702 GN=PNSL5 PE=1 SV=1	--	--	Peptidyl-prolyl cis-trans isomerase [Artemisia annua]	molecular function: catalytic activity (GO:0003824);; biological process: cellular process (GO:0009987)
evm.TU.scaffold_3673.20	evm.TU.scaffold_3673.20	10.1488	440	7.01186	352	3.29185	132	3.84176	155	2.22624	96	2.35085	88	0.023362	-0.938614	down	--	--	Biological Process: biological_process (GO:0008150);; Biological Process: response to radiation (GO:0009314);; Biological Process: response to light stimulus (GO:0009416);; Biological Process: response to abiotic stimulus (GO:0009628);; Biological Process: response to endogenous stimulus (GO:0009719);; Biological Process: response to hormone (GO:0009725);; Biological Process: response to auxin (G…	--	--	--	--	GH3 auxin-responsive promoter	Jasmonoyl--L-amino acid synthetase JAR4 OS=Nicotiana attenuata OX=49451 GN=JAR4 PE=1 SV=1	--	--	indole-3-acetic acid-amido synthetase GH3.5 [Artemisia annua]	biological process: response to stimulus (GO:0050896)
evm.TU.scaffold_924.433	evm.TU.scaffold_924.433	12.5356	145	14.8338	199	19.4674	207	6.03949	65	4.23518	49	6.62417	66	3.62e-05	-1.21889	down	--	--	Biological Process: response to water (GO:0009415);;	--	--	--	--	Dehydrin	--	--	--	dehydrin [Artemisia annua]	biological process: response to stimulus (GO:0050896)
evm.TU.scaffold_6158.103	evm.TU.scaffold_6158.103	1.45468	69	1.55374	85	2.17813	95	3.19044	140	2.91867	137	3.14081	128	0.0296208	0.714957	up	[QV]	Secondary metabolites biosynthesis, transport and catabolism;; Defense mechanisms	Molecular Function: monooxygenase activity (GO:0004497);; Molecular Function: iron ion binding (GO:0005506);; Molecular Function: oxidoreductase activity, acting on paired donors, with incorporation or reduction of molecular oxygen (GO:0016705);; Molecular Function: heme binding (GO:0020037);;	--	--	[Q]	Secondary metabolites biosynthesis, transport and catabolism	Cytochrome P450	Cytochrome P450 82A3 OS=Glycine max OX=3847 GN=CYP82A3 PE=2 SV=1	--	--	cytochrome P450 [Artemisia annua]	molecular function: catalytic activity (GO:0003824);; biological process: metabolic process (GO:0008152);; biological process: single-organism process (GO:0044699);; molecular function: binding (GO:0005488)
evm.TU.scaffold_9411.128	evm.TU.scaffold_9411.128	1.24672	96	1.71474	153	1.52599	108	2.11289	151	2.98861	229	3.7743	250	0.0112604	0.826314	up	[L]	Replication, recombination and repair	Molecular Function: DNA binding (GO:0003677);; Molecular Function: DNA topoisomerase type II (ATP-hydrolyzing) activity (GO:0003918);; Molecular Function: ATP binding (GO:0005524);; Cellular Component: chromosome (GO:0005694);; Biological Process: DNA topological change (GO:0006265);;	--	--	[B]	Chromatin structure and dynamics	DNA gyrase/topoisomerase IV, subunit A	DNA gyrase subunit A, chloroplastic/mitochondrial OS=Nicotiana benthamiana OX=4100 GN=GYRA PE=2 SV=1	--	--	DNA gyrase subunit A [Artemisia annua]	molecular function: binding (GO:0005488);; molecular function: catalytic activity (GO:0003824);; cellular component: cell (GO:0005623);; cellular component: organelle (GO:0043226);; cellular component: cell part (GO:0044464);; biological process: metabolic process (GO:0008152);; biological process: cellular process (GO:0009987);; biological process: cellular component organization or biogenesis (…
evm.TU.scaffold_1478.7	evm.TU.scaffold_1478.7	7.67942	92	8.25729	115	8.9015	98	2.40372	27	5.0763	61	1.79637	19	0.0165528	-0.991772	down	--	--	--	--	--	--	--	--	--	--	--	hypothetical protein CTI12_AA039160 [Artemisia annua]	--
Chrysanthemum_x_morifolium_newGene_21087	--	1.39974	31	1.70077	45	1.79149	39	0.128539	3	0.247738	6	0.068616	2	4.23e-05	-1.6073	down	--	--	--	--	--	--	--	F-box-like	--	S	Function unknown	F-box protein At1g22220-like [Lactuca sativa]	--
Chrysanthemum_x_morifolium_newGene_39470	--	27.8775	283	26.8607	317	16.1629	156	13.0143	128	12.581	132	12.948	114	0.0219353	-0.738213	down	--	--	--	--	--	--	--	--	--	--	--	--	--
evm.TU.scaffold_1535.193	evm.TU.scaffold_1535.193	6.58666	224	5.39257	212	7.6144	238	2.01168	64	3.70223	125	3.2723	96	0.00316252	-0.937359	down	--	--	Molecular Function: hydrolase activity, hydrolyzing O-glycosyl compounds (GO:0004553);; Biological Process: carbohydrate metabolic process (GO:0005975);;	--	--	--	--	Glycosyl hydrolases family 17	Glucan endo-1,3-beta-glucosidase 12 OS=Arabidopsis thaliana OX=3702 GN=At4g29360 PE=2 SV=1	--	--	O-Glycosyl hydrolases family 17 protein [Artemisia annua]	molecular function: catalytic activity (GO:0003824);; biological process: metabolic process (GO:0008152)
evm.TU.scaffold_1584.143	evm.TU.scaffold_1584.143	24.4685	368	27.4418	478	31.6138	438	17.0371	238	19.9823	300	11.7324	152	0.0176088	-0.687596	down	--	--	Biological Process: response to acid chemical (GO:0001101);; Molecular Function: protein binding (GO:0005515);; Cellular Component: cellular_component (GO:0005575);; Cellular Component: intracellular (GO:0005622);; Cellular Component: cell (GO:0005623);; Cellular Component: cytoplasm (GO:0005737);; Cellular Component: vacuole (GO:0005773);; Cellular Component: vacuolar membrane (GO:0005774);; Cel…	--	--	--	--	PLAT/LH2 domain	--	--	--	root storage protein [Artemisia annua]	biological process: response to stimulus (GO:0050896);; molecular function: binding (GO:0005488);; cellular component: cell (GO:0005623);; cellular component: cell part (GO:0044464);; cellular component: organelle (GO:0043226);; cellular component: membrane (GO:0016020);; cellular component: organelle part (GO:0044422)
evm.TU.scaffold_285.377	evm.TU.scaffold_285.377	16.8967	292	24.3399	487	14.2818	227	10.771	173	11.5558	199	11.1228	166	0.0413953	-0.643984	down	--	--	Cellular Component: Golgi membrane (GO:0000139);; Cellular Component: integral component of membrane (GO:0016021);;	--	--	[R]	General function prediction only	Eukaryotic protein of unknown function (DUF846)	Golgi apparatus membrane protein-like protein ECHIDNA OS=Arabidopsis thaliana OX=3702 GN=ECH PE=1 SV=1	--	--	hypothetical protein CTI12_AA191430 [Artemisia annua]	cellular component: cell (GO:0005623);; cellular component: membrane (GO:0016020);; cellular component: organelle (GO:0043226);; cellular component: organelle part (GO:0044422);; cellular component: cell part (GO:0044464);; cellular component: membrane part (GO:0044425)
evm.TU.scaffold_5893.14	evm.TU.scaffold_5893.14	4.93443	157	4.50993	167	3.16765	93	14.7776	436	7.71807	245	10.7333	294	0.000121348	1.14967	up	[CR]	Energy production and conversion;; General function prediction only	Molecular Function: zinc ion binding (GO:0008270);; Molecular Function: oxidoreductase activity (GO:0016491);;	--	--	[CR]	Energy production and conversion;; General function prediction only	Zinc-binding dehydrogenase	2-methylene-furan-3-one reductase OS=Solanum lycopersicum OX=4081 GN=EO PE=1 SV=1	--	--	Alcohol dehydrogenase GroES-like protein [Artemisia annua]	molecular function: binding (GO:0005488);; molecular function: catalytic activity (GO:0003824)
evm.TU.scaffold_3077.39	evm.TU.scaffold_3077.39	1.64885	94	1.81128	120	2.10747	111	3.71279	196	4.02624	229	4.12326	202	2.74e-05	0.97858	up	--	--	Molecular Function: protein binding (GO:0005515);;	--	--	[R]	General function prediction only	Leucine Rich repeat	EIN3-binding F-box protein 2 OS=Arabidopsis thaliana OX=3702 GN=EBF2 PE=1 SV=1	--	--	F-box domain, Leucine-rich repeat domain, L domain-like protein [Artemisia annua]	molecular function: binding (GO:0005488)
evm.TU.scaffold_4964.35	evm.TU.scaffold_4964.35	2.95211	48	1.34578	26	3.4602	52	0.231403	4	0.690195	12	0.489049	7	0.00640428	-1.19595	down	--	--	Cellular Component: cellular_component (GO:0005575);; Cellular Component: cell (GO:0005623);; Cellular Component: plasma membrane (GO:0005886);; Cellular Component: membrane (GO:0016020);; Cellular Component: intrinsic component of membrane (GO:0031224);; Cellular Component: anchored component of membrane (GO:0031225);; Cellular Component: intrinsic component of plasma membrane (GO:0031226);; Cel…	--	--	--	--	Probable lipid transfer	Xylogen-like protein 11 OS=Arabidopsis thaliana OX=3702 GN=XYP11 PE=2 SV=2	--	--	hypothetical protein CTI12_AA010770 [Artemisia annua]	cellular component: cell (GO:0005623);; cellular component: membrane (GO:0016020);; cellular component: cell part (GO:0044464);; cellular component: membrane part (GO:0044425)
Chrysanthemum_x_morifolium_newGene_56617	--	29.1282	997	30.9814	1229	22.3496	713	10.4831	335	9.60764	333	16.4268	493	5.85e-05	-1.02776	down	--	--	--	--	--	--	--	--	--	--	--	--	--
evm.TU.scaffold_4841.24	evm.TU.scaffold_4841.24	4.23507	101	2.58785	72	2.98182	66	6.11668	136	5.8602	139	5.85089	120	0.0450053	0.714238	up	[J]	Translation, ribosomal structure and biogenesis	Molecular Function: structural constituent of ribosome (GO:0003735);; Cellular Component: ribosome (GO:0005840);; Biological Process: translation (GO:0006412);;	--	--	[J]	Translation, ribosomal structure and biogenesis	Ribosomal protein S18	--	--	--	ribosomal protein S18 [Artemisia annua]	molecular function: structural molecule activity (GO:0005198);; cellular component: cell (GO:0005623);; cellular component: macromolecular complex (GO:0032991);; cellular component: organelle (GO:0043226);; cellular component: cell part (GO:0044464);; biological process: metabolic process (GO:0008152);; biological process: cellular process (GO:0009987)
evm.TU.scaffold_750.58	evm.TU.scaffold_750.58	0	0	0	0	0	0	0.667409	22	0.472433	17	0.836546	25	5.91e-05	1.54094	up	[DPM]	Cell cycle control, cell division, chromosome partitioning;; Inorganic ion transport and metabolism;; Cell wall/membrane/envelope biogenesis	Molecular Function: copper ion binding (GO:0005507);; Biological Process: lignin catabolic process (GO:0046274);; Cellular Component: apoplast (GO:0048046);; Molecular Function: hydroquinone:oxygen oxidoreductase activity (GO:0052716);;	--	--	[Q]	Secondary metabolites biosynthesis, transport and catabolism	Multicopper oxidase	Laccase-15 OS=Arabidopsis thaliana OX=3702 GN=TT10 PE=1 SV=1	--	--	laccase/Diphenol oxidase family protein [Artemisia annua]	molecular function: binding (GO:0005488);; biological process: metabolic process (GO:0008152);; biological process: cellular process (GO:0009987);; biological process: single-organism process (GO:0044699);; cellular component: extracellular region (GO:0005576);; molecular function: catalytic activity (GO:0003824)
evm.TU.scaffold_1180.287	evm.TU.scaffold_1180.287	0.236394	5	0.360721	9	0.450394	9	1.05723	21	1.27855	27	2.00758	36	0.02427	1.04685	up	--	--	--	--	--	--	--	Plant protein of unknown function (DUF868)	--	--	--	hypothetical protein CTI12_AA117690 [Artemisia annua]	--
evm.TU.scaffold_1654.280	evm.TU.scaffold_1654.280	32.8213	578	38.9895	795	26.2964	426	17.4682	285	12.3192	216	13.2569	201	4.75e-06	-1.07149	down	[O]	Posttranslational modification, protein turnover, chaperones	Molecular Function: glutathione transferase activity (GO:0004364);; Cellular Component: cytoplasm (GO:0005737);; Biological Process: glutathione metabolic process (GO:0006749);; Molecular Function: glutathione binding (GO:0043295);;	--	--	[O]	Posttranslational modification, protein turnover, chaperones	Glutathione S-transferase, N-terminal domain	Glutathione S-transferase PARB OS=Nicotiana tabacum OX=4097 GN=PARB PE=2 SV=1	--	--	putative glutathione transferase [Helianthus annuus]	molecular function: catalytic activity (GO:0003824);; cellular component: cell (GO:0005623);; cellular component: cell part (GO:0044464);; biological process: metabolic process (GO:0008152);; biological process: cellular process (GO:0009987);; molecular function: binding (GO:0005488)
evm.TU.scaffold_1351.219	evm.TU.scaffold_1351.219	1.40964	43	2.95571	104	2.57339	72	7.87462	220	4.9491	149	6.77811	176	0.000287107	1.18129	up	[I]	Lipid transport and metabolism	Cellular Component: integral component of membrane (GO:0016021);;	--	--	[R]	General function prediction only	Enoyl-(Acyl carrier protein) reductase	Enoyl-[acyl-carrier-protein] reductase [NADH], chloroplastic OS=Arabidopsis thaliana OX=3702 GN=MOD1 PE=1 SV=1	--	--	hypothetical protein CTI12_AA461010 [Artemisia annua]	cellular component: membrane (GO:0016020);; cellular component: membrane part (GO:0044425)
evm.TU.scaffold_10879.8	evm.TU.scaffold_10879.8	6.76489	168	6.97845	201	7.74305	177	4.17827	96	4.54944	113	3.41171	73	0.0107579	-0.728488	down	--	--	Cellular Component: integral component of membrane (GO:0016021);; Biological Process: oxidation-reduction process (GO:0055114);;	--	--	[T]	Signal transduction mechanisms	Eukaryotic cytochrome b561	Cytochrome b561 domain-containing protein At4g18260 OS=Arabidopsis thaliana OX=3702 GN=At4g18260 PE=2 SV=1	--	--	cytochrome b561, eukaryote [Artemisia annua]	cellular component: membrane (GO:0016020);; cellular component: membrane part (GO:0044425);; biological process: metabolic process (GO:0008152);; biological process: single-organism process (GO:0044699)
evm.TU.scaffold_1749.318	evm.TU.scaffold_1749.318	0.50636	20	0.978526	44	1.37972	49	12.1323	431	10.2439	391	12.7084	419	9.33e-35	2.99096	up	[QV]	Secondary metabolites biosynthesis, transport and catabolism;; Defense mechanisms	Molecular Function: monooxygenase activity (GO:0004497);; Molecular Function: iron ion binding (GO:0005506);; Molecular Function: oxidoreductase activity, acting on paired donors, with incorporation or reduction of molecular oxygen (GO:0016705);; Molecular Function: heme binding (GO:0020037);;	--	--	[Q]	Secondary metabolites biosynthesis, transport and catabolism	Cytochrome P450	Cytochrome P450 81Q32 OS=Catharanthus roseus OX=4058 GN=CYP81Q32 PE=2 SV=1	--	--	cytochrome P450-like protein [Artemisia annua]	molecular function: catalytic activity (GO:0003824);; biological process: metabolic process (GO:0008152);; biological process: single-organism process (GO:0044699);; molecular function: binding (GO:0005488)
evm.TU.scaffold_270.97	evm.TU.scaffold_270.97	3.0147	127	2.87875	140	4.16549	161	1.11141	44	1.32557	56	1.53493	56	0.000370003	-1.09649	down	--	--	Cellular Component: integral component of membrane (GO:0016021);;	--	--	[R]	General function prediction only	Domain of unknown function	Protein ACCELERATED CELL DEATH 6 OS=Arabidopsis thaliana OX=3702 GN=ACD6 PE=1 SV=1	--	--	ankyrin repeat-containing domain, PGG domain protein [Artemisia annua]	cellular component: membrane (GO:0016020);; cellular component: membrane part (GO:0044425)
evm.TU.scaffold_601.56	evm.TU.scaffold_601.56	4.67737	44	4.71546	51	4.69363	40	1.70296	15	1.42932	14	1.60775	13	0.0147842	-1.03469	down	--	--	Cellular Component: endoplasmic reticulum membrane (GO:0005789);; Cellular Component: integral component of membrane (GO:0016021);;	--	--	--	--	--	--	--	--	major sperm protein (MSP) domain, Vesicle-associated membrane-protein-associated protein [Artemisia annua]	cellular component: cell (GO:0005623);; cellular component: membrane (GO:0016020);; cellular component: organelle (GO:0043226);; cellular component: organelle part (GO:0044422);; cellular component: membrane part (GO:0044425);; cellular component: cell part (GO:0044464)
evm.TU.scaffold_9336.10	evm.TU.scaffold_9336.10	24.916	177	20.092	166	21.2161	139	6.57557	44	9.79429	70	5.76911	36	1.47e-05	-1.28422	down	--	--	--	--	--	--	--	--	--	--	--	--	--
evm.TU.scaffold_1756.78	evm.TU.scaffold_1756.78	6.91703	343	6.3437	364	5.61622	256	4.2534	195	3.06426	151	4.16645	178	0.0168067	-0.654215	down	--	--	Molecular Function: kinase activity (GO:0016301);;	--	--	[T]	Signal transduction mechanisms	Phosphatidylinositol 3- and 4-kinase	Phosphatidylinositol 4-kinase gamma 7 OS=Arabidopsis thaliana OX=3702 GN=PI4KG7 PE=1 SV=2	--	--	phosphatidylinositol 3-/4-kinase, catalytic domain, Ubiquitin-related domain protein [Artemisia annua]	molecular function: catalytic activity (GO:0003824)
Chrysanthemum_x_morifolium_newGene_97336	--	0	0	0.070988	2	0	0	1.07298	19	1.22935	23	1.63815	26	0.000139245	1.49364	up	[IQ]	Lipid transport and metabolism;; Secondary metabolites biosynthesis, transport and catabolism	Biological Process: fatty acid biosynthetic process (GO:0006633);; Molecular Function: transferase activity, transferring acyl groups other than amino-acyl groups (GO:0016747);;	K09458|2.89786e-109|vvi:100258842|K09458 3-oxoacyl-[acyl-carrier-protein] synthase II [EC:2.3.1.179] | (RefSeq) 3-oxoacyl-[acyl-carrier-protein] synthase I, chloroplastic	Fatty acid biosynthesis (ko00061);; Biotin metabolism (ko00780);; Fatty acid metabolism (ko01212)	[IQ]	Lipid transport and metabolism;; Secondary metabolites biosynthesis, transport and catabolism	--	3-oxoacyl-[acyl-carrier-protein] synthase I, chloroplastic OS=Arabidopsis thaliana OX=3702 GN=KAS1 PE=1 SV=2	I	Lipid transport and metabolism	3-oxoacyl-[acyl-carrier-protein] synthase 2 [Cynara cardunculus var. scolymus]	biological process: metabolic process (GO:0008152);; biological process: cellular process (GO:0009987);; biological process: single-organism process (GO:0044699);; molecular function: catalytic activity (GO:0003824)
Chrysanthemum_x_morifolium_newGene_103580	--	11.2383	207	6.81383	140	4.59548	80	3.60969	63	3.00144	56	1.83674	30	0.01674	-0.989538	down	--	--	--	K17969|3.02968e-18|pop:POPTR_0006s04020g|K17969 mitochondrial fission 1 protein | (RefSeq) hypothetical protein	--	[M]	Cell wall/membrane/envelope biogenesis	--	Mitochondrial fission 1 protein B OS=Arabidopsis thaliana OX=3702 GN=FIS1B PE=1 SV=1	U	Intracellular trafficking, secretion, and vesicular transport	hypothetical protein PAHAL_D02212 [Panicum hallii]	--
evm.TU.scaffold_61.37	evm.TU.scaffold_61.37	3.09614	54	5.16092	103	7.23819	115	1.33108	22	2.64854	46	1.01895	16	0.0177316	-1.0324	down	--	--	Cellular Component: integral component of membrane (GO:0016021);;	--	--	[U]	Intracellular trafficking, secretion, and vesicular transport	TB2/DP1, HVA22 family	HVA22-like protein a OS=Arabidopsis thaliana OX=3702 GN=HVA22A PE=2 SV=1	--	--	HVA22-C-like protein [Artemisia annua]	cellular component: membrane (GO:0016020);; cellular component: membrane part (GO:0044425)
evm.TU.scaffold_1538.29	evm.TU.scaffold_1538.29	5.86362	109	7.67187	166	6.861	118	1.87703	33	1.85784	35	2.27968	37	4.87e-07	-1.43784	down	--	--	--	--	--	--	--	--	--	--	--	hypothetical protein CTI12_AA573160 [Artemisia annua]	--
evm.TU.scaffold_1535.278	evm.TU.scaffold_1535.278	7.33852	271	7.99817	342	6.27218	213	12.6716	433	12.7757	469	12.0337	382	0.000220873	0.734235	up	[O]	Posttranslational modification, protein turnover, chaperones	Biological Process: protein folding (GO:0006457);; Biological Process: protein transport (GO:0015031);;	--	--	--	--	Bacterial trigger factor protein (TF) C-terminus	Trigger factor-like protein TIG, Chloroplastic OS=Arabidopsis thaliana OX=3702 GN=TIG PE=1 SV=1	--	--	trigger factor type chaperone family protein [Artemisia annua]	biological process: cellular process (GO:0009987);; biological process: localization (GO:0051179)
evm.TU.scaffold_314.52	evm.TU.scaffold_314.52	5.66928	134	4.09455	112	4.94721	108	8.68306	190	7.97053	188	7.86639	160	0.0308544	0.648296	up	[M]	Cell wall/membrane/envelope biogenesis	Cellular Component: integral component of membrane (GO:0016021);;	--	--	--	--	MlaD protein	Protein TRIGALACTOSYLDIACYLGLYCEROL 2, chloroplastic OS=Arabidopsis thaliana OX=3702 GN=TGD2 PE=1 SV=1	--	--	hypothetical protein CTI12_AA068660 [Artemisia annua]	cellular component: membrane (GO:0016020);; cellular component: membrane part (GO:0044425)
Chrysanthemum_x_morifolium_newGene_42424	--	3.73587	98	3.87049	109	4.41915	119	1.32581	37	2.03527	60	1.08613	28	0.00725154	-0.985915	down	--	--	--	--	--	--	--	--	--	--	--	--	--
evm.TU.scaffold_4163.34	evm.TU.scaffold_4163.34	40.836	500	49.1345	696	43.7894	493	93.2252	1056	79.1355	963	81.9046	861	1.63e-08	0.876259	up	[J]	Translation, ribosomal structure and biogenesis	Molecular Function: structural constituent of ribosome (GO:0003735);; Cellular Component: ribosome (GO:0005840);; Biological Process: translation (GO:0006412);;	--	--	[J]	Translation, ribosomal structure and biogenesis	Ribosomal proteins 50S L24/mitochondrial 39S L24	50S ribosomal protein L24, chloroplastic OS=Nicotiana tabacum OX=4097 GN=RPL24 PE=1 SV=1	--	--	50S ribosomal protein L24, chloroplastic [Lactuca sativa]	molecular function: structural molecule activity (GO:0005198);; cellular component: cell (GO:0005623);; cellular component: macromolecular complex (GO:0032991);; cellular component: organelle (GO:0043226);; cellular component: cell part (GO:0044464);; biological process: metabolic process (GO:0008152);; biological process: cellular process (GO:0009987)
evm.TU.scaffold_asm3_new.616	evm.TU.scaffold_asm3_new.616	13.3967	504	14.1698	618	5.17506	180	6.6685	233	4.2583	160	4.88039	158	0.049318	-0.812246	down	[G]	Carbohydrate transport and metabolism	Cellular Component: integral component of membrane (GO:0016021);; Molecular Function: transmembrane transporter activity (GO:0022857);;	--	--	[G]	Carbohydrate transport and metabolism	Major Facilitator Superfamily	Putative glycerol-3-phosphate transporter 1 OS=Arabidopsis thaliana OX=3702 GN=At3g47420 PE=2 SV=1	--	--	major facilitator superfamily domain protein [Artemisia annua]	cellular component: membrane (GO:0016020);; cellular component: membrane part (GO:0044425);; molecular function: transporter activity (GO:0005215);; biological process: localization (GO:0051179)
evm.TU.scaffold_969.401	evm.TU.scaffold_969.401	11.0246	323	10.8702	369	10.6996	288	6.92056	188	6.30157	184	7.05546	178	0.00254992	-0.643387	down	--	--	Molecular Function: protein binding (GO:0005515);;	--	--	--	--	F-box domain	F-box/FBD/LRR-repeat protein At1g13570 OS=Arabidopsis thaliana OX=3702 GN=At1g13570 PE=2 SV=1	--	--	F-box domain, FBD domain, Leucine-rich repeat domain, L domain-like protein [Artemisia annua]	molecular function: binding (GO:0005488)
evm.TU.scaffold_7676.1	evm.TU.scaffold_7676.1	0.07524	3	0.05829	3	0.310171	9	0.989	29	1.16791	36	0.822303	22	0.00597572	1.20447	up	--	--	Molecular Function: transferase activity, transferring acyl groups other than amino-acyl groups (GO:0016747);;	--	--	--	--	Transferase family	Omega-hydroxypalmitate O-feruloyl transferase OS=Arabidopsis thaliana OX=3702 GN=HHT1 PE=1 SV=1	--	--	HXXXD-type acyl-transferase family protein [Artemisia annua]	molecular function: catalytic activity (GO:0003824)
evm.TU.scaffold_507.32	evm.TU.scaffold_507.32	2.48738	75	2.87122	100	2.33056	65	4.83089	134	4.6421	139	4.47277	116	0.0146437	0.737563	up	[I]	Lipid transport and metabolism	Molecular Function: methyltransferase activity (GO:0008168);; Biological Process: lipid biosynthetic process (GO:0008610);; Biological Process: methylation (GO:0032259);;	--	--	--	--	Mycolic acid cyclopropane synthetase	(S)-coclaurine N-methyltransferase OS=Thalictrum flavum subsp. glaucum OX=150095 PE=1 SV=1	--	--	(S)-coclaurine N-methyltransferase [Helianthus annuus]	molecular function: catalytic activity (GO:0003824);; biological process: metabolic process (GO:0008152);; biological process: single-organism process (GO:0044699)
evm.TU.scaffold_790.158	evm.TU.scaffold_790.158	47.9029	482	46.2335	539	52.7307	488	24.7499	231	18.4697	185	15.179	132	3.61e-08	-1.20246	down	--	--	Molecular Function: enzyme inhibitor activity (GO:0004857);;	--	--	--	--	Plant invertase/pectin methylesterase inhibitor	Pectinesterase inhibitor 3 OS=Arabidopsis thaliana OX=3702 GN=PMEI3 PE=2 SV=1	--	--	Pectinesterase inhibitor [Artemisia annua]	molecular function: molecular function regulator (GO:0098772);; biological process: biological regulation (GO:0065007)
Chrysanthemum_x_morifolium_newGene_108591	--	2.5094	40	2.24525	49	4.48982	66	0.531486	9	0.260956	5	0.495537	8	7.48e-05	-1.53889	down	--	--	Cellular Component: membrane (GO:0016020);; Molecular Function: transferase activity (GO:0016740);;	K09833|3.47305e-19|nnu:104603204|K09833 homogentisate phytyltransferase / homogentisate geranylgeranyltransferase [EC:2.5.1.115 2.5.1.116] | (RefSeq) probable homogentisate phytyltransferase 1, chloroplastic	Ubiquinone and other terpenoid-quinone biosynthesis (ko00130)	--	--	--	Probable homogentisate phytyltransferase 1, chloroplastic OS=Oryza sativa subsp. japonica OX=39947 GN=HPT1 PE=2 SV=1	H	Coenzyme transport and metabolism	homogentisate phytyltransferase 1, chloroplastic-like [Helianthus annuus]	cellular component: membrane (GO:0016020);; molecular function: catalytic activity (GO:0003824)
evm.TU.scaffold_1212.54	evm.TU.scaffold_1212.54	2.13022	43	2.86382	67	2.93028	54	6.82923	127	8.10579	161	9.03765	155	8.41e-07	1.33767	up	--	--	Molecular Function: molecular_function (GO:0003674);; Molecular Function: transporter activity (GO:0005215);; Cellular Component: cellular_component (GO:0005575);; Cellular Component: intracellular (GO:0005622);; Cellular Component: cell (GO:0005623);; Cellular Component: cytoplasm (GO:0005737);; Biological Process: protein targeting (GO:0006605);; Biological Process: transport (GO:0006810);; Bio…	--	--	--	--	GYF domain 2	Protein TIC 56, chloroplastic OS=Arabidopsis thaliana OX=3702 GN=TIC56 PE=1 SV=1	--	--	hypothetical protein CTI12_AA304170 [Artemisia annua]	molecular function: transporter activity (GO:0005215);; cellular component: cell (GO:0005623);; cellular component: cell part (GO:0044464);; biological process: localization (GO:0051179);; cellular component: organelle (GO:0043226);; cellular component: organelle part (GO:0044422);; cellular component: membrane (GO:0016020);; biological process: single-organism process (GO:0044699)
evm.TU.scaffold_216.194	evm.TU.scaffold_216.194	24.6267	935	21.4216	942	19.6034	685	13.1344	462	12.1503	459	10.942	357	1.14e-05	-0.81322	down	--	--	Cellular Component: plant-type vacuole (GO:0000325);; Biological Process: cell morphogenesis (GO:0000902);; Molecular Function: molecular_function (GO:0003674);; Molecular Function: transporter activity (GO:0005215);; Cellular Component: cellular_component (GO:0005575);; Cellular Component: intracellular (GO:0005622);; Cellular Component: cell (GO:0005623);; Cellular Component: cytoplasm (GO:0005…	--	--	--	--	EamA-like transporter family	Protein WALLS ARE THIN 1 OS=Arabidopsis thaliana OX=3702 GN=WAT1 PE=1 SV=1	--	--	walls Are Thin 1 [Artemisia annua]	cellular component: cell (GO:0005623);; cellular component: organelle (GO:0043226);; cellular component: cell part (GO:0044464);; biological process: cellular process (GO:0009987);; biological process: developmental process (GO:0032502);; biological process: single-organism process (GO:0044699);; biological process: cellular component organization or biogenesis (GO:0071840);; molecular function: …
evm.TU.scaffold_959.68	evm.TU.scaffold_959.68	6.05192	155	6.80302	202	8.4909	200	12.0898	287	14.4874	369	14.5205	320	0.000185502	0.859035	up	--	--	Molecular Function: nucleic acid binding (GO:0003676);; Biological Process: gene silencing by RNA (GO:0031047);;	--	--	[J]	Translation, ribosomal structure and biogenesis	N-terminal domain of argonaute	Protein argonaute 4 OS=Arabidopsis thaliana OX=3702 GN=AGO4 PE=1 SV=2	--	--	protein argonaute 16 [Artemisia annua]	molecular function: binding (GO:0005488);; biological process: cellular process (GO:0009987);; biological process: single-organism process (GO:0044699);; biological process: biological regulation (GO:0065007)
evm.TU.scaffold_1820.198	evm.TU.scaffold_1820.198	0.254099	22	0.235923	23	0.17998	14	0.476908	38	0.5688	48	0.719947	53	0.0311215	0.946194	up	[S]	Function unknown	Molecular Function: DNA binding (GO:0003677);; Molecular Function: DNA topoisomerase type I activity (GO:0003917);; Cellular Component: chromosome (GO:0005694);; Biological Process: DNA topological change (GO:0006265);;	--	--	[L]	Replication, recombination and repair	DNA topoisomerase	--	--	--	DNA topoisomerase, type IA, core [Artemisia annua]	molecular function: binding (GO:0005488);; molecular function: catalytic activity (GO:0003824);; cellular component: cell (GO:0005623);; cellular component: organelle (GO:0043226);; cellular component: cell part (GO:0044464);; biological process: metabolic process (GO:0008152);; biological process: cellular process (GO:0009987);; biological process: cellular component organization or biogenesis (…
Chrysanthemum_x_morifolium_newGene_16893	--	4.00892	123	2.7646	99	4.53209	128	5.60767	160	8.04844	246	8.68254	229	0.0123557	0.823604	up	[R]	General function prediction only	Molecular Function: alditol:NADP+ 1-oxidoreductase activity (GO:0004032);; Cellular Component: chloroplast stroma (GO:0009570);; Cellular Component: chloroplast envelope (GO:0009941);; Biological Process: oxidation-reduction process (GO:0055114);;	--	--	[C]	Energy production and conversion	Aldo/keto reductase family	Probable voltage-gated potassium channel subunit beta OS=Arabidopsis thaliana OX=3702 GN=KAB1 PE=1 SV=1	C	Energy production and conversion	uncharacterized protein LOC110930877 [Helianthus annuus]	molecular function: catalytic activity (GO:0003824);; biological process: metabolic process (GO:0008152);; biological process: single-organism process (GO:0044699);; cellular component: cell (GO:0005623);; cellular component: organelle (GO:0043226);; cellular component: organelle part (GO:0044422);; cellular component: cell part (GO:0044464)
evm.TU.scaffold_44.64	evm.TU.scaffold_44.64	0.901987	43	1.37808	75	1.52539	66	3.29415	143	2.42734	113	2.19087	88	0.0230375	0.837891	up	[R]	General function prediction only	Molecular Function: protein-arginine N-methyltransferase activity (GO:0016274);;	--	--	[D]	Cell cycle control, cell division, chromosome partitioning	PRMT5 TIM barrel domain	Protein arginine N-methyltransferase 1.5 OS=Arabidopsis thaliana OX=3702 GN=PMRT15 PE=1 SV=2	--	--	SHK1 binding protein 1 [Artemisia annua]	molecular function: catalytic activity (GO:0003824);; biological process: metabolic process (GO:0008152);; biological process: cellular process (GO:0009987)
evm.TU.scaffold_891.299	evm.TU.scaffold_891.299	3.11267	45	6.23115	104	7.47899	99	12.1985	162	15.3498	219	10.1854	126	0.0155587	0.908394	up	--	--	--	--	--	--	--	Hydrophobic seed protein	14 kDa proline-rich protein DC2.15 OS=Daucus carota OX=4039 PE=2 SV=1	--	--	hypothetical protein CTI12_AA466970 [Artemisia annua]	--
evm.TU.scaffold_36.132	evm.TU.scaffold_36.132	9.77984	229	7.27685	198	5.51931	119	21.215	460	11.3815	266	12.087	244	0.0337964	0.78874	up	--	--	--	--	--	--	--	Protein RETICULATA-related	Protein RETICULATA-RELATED 4, chloroplastic OS=Arabidopsis thaliana OX=3702 GN=RER4 PE=2 SV=1	--	--	protein RETICULATA-RELATED 4, chloroplastic [Helianthus annuus]	--
evm.TU.scaffold_1028.190	evm.TU.scaffold_1028.190	4.52494	203	4.71784	245	2.30064	95	2.51697	105	1.57791	71	1.24502	48	0.0492222	-0.833909	down	--	--	Molecular Function: voltage-gated potassium channel activity (GO:0005249);; Cellular Component: integral component of membrane (GO:0016021);;	--	--	[PT]	Inorganic ion transport and metabolism;; Signal transduction mechanisms	Ion transport protein	Protein CNGC15c OS=Medicago truncatula OX=3880 GN=CNGC15C PE=1 SV=1	--	--	IQ motif, EF-hand binding site, Potassium channel, voltage-dependent, EAG/ELK/ERG [Artemisia annua]	molecular function: transporter activity (GO:0005215);; biological process: cellular process (GO:0009987);; biological process: single-organism process (GO:0044699);; biological process: localization (GO:0051179);; biological process: biological regulation (GO:0065007);; cellular component: membrane (GO:0016020);; cellular component: membrane part (GO:0044425)
evm.TU.scaffold_11314.195	evm.TU.scaffold_11314.195	9.91456	426	9.15665	456	8.45748	335	18.5094	737	13.2861	569	15.7261	581	0.000682146	0.723131	up	[QV]	Secondary metabolites biosynthesis, transport and catabolism;; Defense mechanisms	Molecular Function: monooxygenase activity (GO:0004497);; Molecular Function: iron ion binding (GO:0005506);; Cellular Component: integral component of membrane (GO:0016021);; Molecular Function: oxidoreductase activity, acting on paired donors, with incorporation or reduction of molecular oxygen (GO:0016705);; Molecular Function: heme binding (GO:0020037);;	--	--	[Q]	Secondary metabolites biosynthesis, transport and catabolism	Cytochrome P450	3-beta-hydroxylase OS=Tanacetum parthenium OX=127999 GN=CYP71CB1 PE=1 SV=1	--	--	RecName: Full=3-beta-hydroxylase; Short=Tp8878; AltName: Full=Cytochrome P450 71CB1 [Tanacetum parthenium]	molecular function: catalytic activity (GO:0003824);; biological process: metabolic process (GO:0008152);; biological process: single-organism process (GO:0044699);; molecular function: binding (GO:0005488);; cellular component: membrane (GO:0016020);; cellular component: membrane part (GO:0044425)
evm.TU.scaffold_1337.58	evm.TU.scaffold_1337.58	1.53944	98	1.2187	90	2.20129	128	5.3663	315	6.96978	439	6.22646	339	4.75e-12	1.65068	up	--	--	Molecular Function: oxidoreductase activity, acting on single donors with incorporation of molecular oxygen, incorporation of two atoms of oxygen (GO:0016702);; Biological Process: oxylipin biosynthetic process (GO:0031408);; Molecular Function: metal ion binding (GO:0046872);;	--	--	--	--	Lipoxygenase	Lipoxygenase 2, chloroplastic OS=Tanacetum cinerariifolium OX=118510 GN=LOX2 PE=2 SV=1	--	--	lipoxygenase [Artemisia annua]	molecular function: catalytic activity (GO:0003824);; biological process: metabolic process (GO:0008152);; biological process: single-organism process (GO:0044699);; biological process: cellular process (GO:0009987);; molecular function: binding (GO:0005488)
evm.TU.scaffold_1180.204	evm.TU.scaffold_1180.204	5.36358	314	6.60011	447	6.36686	343	9.578	519	9.50322	554	9.21865	464	0.00153942	0.589949	up	--	--	Molecular Function: nucleic acid binding (GO:0003676);;	--	--	--	--	--	Protein PLASTID TRANSCRIPTIONALLY ACTIVE 10 OS=Arabidopsis thaliana OX=3702 GN=PTAC10 PE=1 SV=1	--	--	nucleic acid-binding, OB-fold-like protein [Artemisia annua]	molecular function: binding (GO:0005488)
evm.TU.scaffold_1745.49	evm.TU.scaffold_1745.49	0	0	0.060721	3	0.088454	3	0.956766	26	0.947416	28	0.723835	19	0.00067993	1.3902	up	[IQ]	Lipid transport and metabolism;; Secondary metabolites biosynthesis, transport and catabolism	Biological Process: fatty acid biosynthetic process (GO:0006633);; Molecular Function: transferase activity, transferring acyl groups other than amino-acyl groups (GO:0016747);;	--	--	[IQ]	Lipid transport and metabolism;; Secondary metabolites biosynthesis, transport and catabolism	Beta-ketoacyl synthase, N-terminal domain	3-oxoacyl-[acyl-carrier-protein] synthase I, chloroplastic OS=Arabidopsis thaliana OX=3702 GN=KAS1 PE=1 SV=2	--	--	3-oxoacyl-[acyl-carrier-protein] synthase 2 [Artemisia annua]	biological process: metabolic process (GO:0008152);; biological process: cellular process (GO:0009987);; biological process: single-organism process (GO:0044699);; molecular function: catalytic activity (GO:0003824)
evm.TU.scaffold_1817.122	evm.TU.scaffold_1817.122	5.3548	135	6.49587	189	5.4664	126	10.9562	255	12.7687	319	9.99883	216	0.000224177	0.865613	up	--	--	Biological Process: cytidine to uridine editing (GO:0016554);;	--	--	--	--	--	DAG protein, chloroplastic OS=Antirrhinum majus OX=4151 GN=DAG PE=2 SV=1	--	--	hypothetical protein CTI12_AA173280 [Artemisia annua]	biological process: metabolic process (GO:0008152);; biological process: cellular process (GO:0009987)
evm.TU.scaffold_1136.59	evm.TU.scaffold_1136.59	11.176	170	9.55318	168	7.83321	110	3.60504	51	2.87355	44	4.43336	58	0.000212666	-1.14412	down	--	--	Biological Process: lipid transport (GO:0006869);; Molecular Function: lipid binding (GO:0008289);;	--	--	--	--	Protease inhibitor/seed storage/LTP family	Non-specific lipid-transfer protein Lac s 1 OS=Lactuca sativa OX=4236 GN=LSAT_1X82001 PE=1 SV=1	--	--	lipid transfer protein-4 [Artemisia annua]	biological process: single-organism process (GO:0044699);; biological process: localization (GO:0051179);; molecular function: binding (GO:0005488)
evm.TU.scaffold_1670.23	evm.TU.scaffold_1670.23	15.5592	260	14.687	284	16.6146	255	9.18476	142	10.925	182	9.91367	143	0.0187693	-0.590053	down	--	--	Cellular Component: integral component of membrane (GO:0016021);;	--	--	--	--	Protein of unknown function (DUF1218)	--	--	--	hypothetical protein CTI12_AA474120 [Artemisia annua]	cellular component: membrane (GO:0016020);; cellular component: membrane part (GO:0044425)
evm.TU.scaffold_367.196	evm.TU.scaffold_367.196	4.19377	136	2.21108	83	2.52523	76	0.906166	28	0.864872	28	0.864278	25	0.000477785	-1.26752	down	--	--	--	--	--	--	--	--	--	--	--	protein BYPASS-related protein [Artemisia annua]	--
evm.TU.scaffold_222.7	evm.TU.scaffold_222.7	9.20203	508	9.8396	629	10.7595	546	14.2942	730	16.0414	881	17.1439	813	0.000206983	0.635449	up	[M]	Cell wall/membrane/envelope biogenesis	Biological Process: intracellular protein transport (GO:0006886);; Cellular Component: chloroplast (GO:0009507);; Molecular Function: P-P-bond-hydrolysis-driven protein transmembrane transporter activity (GO:0015450);; Cellular Component: outer membrane (GO:0019867);;	--	--	--	--	Omp85 superfamily domain	Protein TOC75-3, chloroplastic OS=Arabidopsis thaliana OX=3702 GN=TOC75-3 PE=1 SV=1	--	--	translocon at the outer envelope membrane of chloroplasts 75-III [Artemisia annua]	biological process: localization (GO:0051179);; cellular component: cell (GO:0005623);; cellular component: organelle (GO:0043226);; cellular component: cell part (GO:0044464);; molecular function: transporter activity (GO:0005215);; cellular component: membrane (GO:0016020)
evm.TU.scaffold_1704.5	evm.TU.scaffold_1704.5	12.7658	183	15.0098	248	13.0035	171	30.0002	397	19.1397	272	23.6843	291	0.00608017	0.740096	up	--	--	Molecular Function: calcium ion binding (GO:0005509);; Cellular Component: photosystem II oxygen evolving complex (GO:0009654);; Biological Process: photosynthesis (GO:0015979);; Cellular Component: extrinsic component of membrane (GO:0019898);;	--	--	--	--	PsbP	PsbP-like protein 1, chloroplastic OS=Arabidopsis thaliana OX=3702 GN=PPL1 PE=1 SV=1	--	--	psbP-like protein 1 [Artemisia annua]	molecular function: binding (GO:0005488);; cellular component: cell (GO:0005623);; cellular component: membrane (GO:0016020);; cellular component: macromolecular complex (GO:0032991);; cellular component: membrane part (GO:0044425);; cellular component: cell part (GO:0044464);; biological process: metabolic process (GO:0008152);; biological process: cellular process (GO:0009987)
evm.TU.scaffold_4175.35	evm.TU.scaffold_4175.35	3.19163	124	3.08825	139	4.34583	155	2.04126	73	1.92455	74	1.48035	50	0.0153935	-0.809126	down	--	--	Biological Process: oligopeptide transport (GO:0006857);; Cellular Component: integral component of membrane (GO:0016021);; Molecular Function: transmembrane transporter activity (GO:0022857);;	--	--	[E]	Amino acid transport and metabolism	POT family	Protein NRT1/ PTR FAMILY 2.7 OS=Arabidopsis thaliana OX=3702 GN=NPF2.7 PE=1 SV=1	--	--	proton-dependent oligopeptide transporter family [Artemisia annua]	biological process: localization (GO:0051179);; cellular component: membrane (GO:0016020);; cellular component: membrane part (GO:0044425);; molecular function: transporter activity (GO:0005215)
evm.TU.scaffold_7093.49	evm.TU.scaffold_7093.49	0.612342	12	1.04711	23	1.55208	27	5.23178	90	2.86044	53	5.55161	88	0.000408862	1.35749	up	[R]	General function prediction only	Molecular Function: O-methyltransferase activity (GO:0008171);; Biological Process: methylation (GO:0032259);;	--	--	[Q]	Secondary metabolites biosynthesis, transport and catabolism	O-methyltransferase	Probable caffeoyl-CoA O-methyltransferase At4g26220 OS=Arabidopsis thaliana OX=3702 GN=At4g26220 PE=2 SV=1	--	--	S-adenosyl-L-methionine-dependent methyltransferases superfamily protein [Artemisia annua]	molecular function: catalytic activity (GO:0003824);; biological process: metabolic process (GO:0008152)
evm.TU.scaffold_872.2	evm.TU.scaffold_872.2	6.45105	448	6.91931	556	7.11527	454	4.97497	320	2.63465	182	3.41369	204	0.00541509	-0.790805	down	--	--	Cellular Component: cellular_component (GO:0005575);; Cellular Component: intracellular (GO:0005622);; Cellular Component: cell (GO:0005623);; Cellular Component: cytoplasm (GO:0005737);; Biological Process: transport (GO:0006810);; Biological Process: biological_process (GO:0008150);; Cellular Component: chloroplast (GO:0009507);; Cellular Component: plastid (GO:0009536);; Biological Process: va…	--	--	[O]	Posttranslational modification, protein turnover, chaperones	Clp amino terminal domain, pathogenicity island component	Protein SMAX1-LIKE 4 OS=Arabidopsis thaliana OX=3702 GN=SMXL4 PE=1 SV=1	--	--	clp amino terminal domain-containing protein [Artemisia annua]	cellular component: cell (GO:0005623);; cellular component: cell part (GO:0044464);; biological process: localization (GO:0051179);; cellular component: organelle (GO:0043226);; biological process: multicellular organismal process (GO:0032501);; biological process: single-organism process (GO:0044699);; biological process: biological regulation (GO:0065007)
Chrysanthemum_x_morifolium_newGene_61814	--	27.7117	178	24.9969	186	32.0486	189	15.5082	92	6.17683	40	7.44141	41	0.000723	-1.1812	down	[P]	Inorganic ion transport and metabolism	Molecular Function: carbonate dehydratase activity (GO:0004089);; Cellular Component: cytoplasm (GO:0005737);; Molecular Function: zinc ion binding (GO:0008270);; Biological Process: carbon utilization (GO:0015976);;	K01673|5.0904e-39|mtr:MTR_6g006990|K01673 carbonic anhydrase [EC:4.2.1.1] | (RefSeq) carbonic anhydrase family protein	Nitrogen metabolism (ko00910)	[P]	Inorganic ion transport and metabolism	Carbonic anhydrase	Carbonic anhydrase 2 (Fragment) OS=Flaveria linearis OX=4225 PE=2 SV=1	P	Inorganic ion transport and metabolism	carbonic anhydrase 2 isoform X2 [Helianthus annuus]	molecular function: catalytic activity (GO:0003824);; cellular component: cell (GO:0005623);; cellular component: cell part (GO:0044464);; molecular function: binding (GO:0005488);; biological process: single-organism process (GO:0044699)
evm.TU.scaffold_1573.199	evm.TU.scaffold_1573.199	4.0673	210	6.01891	359	5.12835	243	9.04542	431	9.56716	490	8.42301	373	0.000706445	0.757128	up	[L]	Replication, recombination and repair	Molecular Function: DNA binding (GO:0003677);; Molecular Function: DNA helicase activity (GO:0003678);; Molecular Function: ATP binding (GO:0005524);; Cellular Component: nucleus (GO:0005634);; Biological Process: DNA replication initiation (GO:0006270);; Biological Process: cell cycle (GO:0007049);; Cellular Component: MCM complex (GO:0042555);;	--	--	[L]	Replication, recombination and repair	MCM P-loop domain	DNA replication licensing factor MCM7 OS=Oryza sativa subsp. indica OX=39946 GN=MCM7 PE=3 SV=1	--	--	DNA replication licensing factor MCM7 [Cynara cardunculus var. scolymus]	molecular function: binding (GO:0005488);; molecular function: catalytic activity (GO:0003824);; cellular component: cell (GO:0005623);; cellular component: organelle (GO:0043226);; cellular component: cell part (GO:0044464);; biological process: metabolic process (GO:0008152);; biological process: cellular process (GO:0009987);; biological process: single-organism process (GO:0044699);; cellular…
evm.TU.scaffold_5128.8	evm.TU.scaffold_5128.8	11.3438	236	6.41002	155	10.6404	204	2.48421	48	3.73817	78	3.39814	61	6e-05	-1.25494	down	--	--	--	--	--	[R]	General function prediction only	--	--	--	--	Regulator of rDNA transcription protein 15 [Capsicum baccatum]	--
evm.TU.scaffold_9088.133	evm.TU.scaffold_9088.133	18.2635	326	19.3111	399	14.1867	233	41.2603	682	25.971	462	29.4499	452	0.00305984	0.794402	up	[G]	Carbohydrate transport and metabolism	Molecular Function: channel activity (GO:0015267);; Cellular Component: integral component of membrane (GO:0016021);;	--	--	[G]	Carbohydrate transport and metabolism	Major intrinsic protein	Probable aquaporin PIP1-4 OS=Arabidopsis thaliana OX=3702 GN=PIP1.4 PE=1 SV=1	--	--	aquaporin PIP1-3 [Cynara cardunculus var. scolymus]	molecular function: transporter activity (GO:0005215);; biological process: localization (GO:0051179);; cellular component: membrane (GO:0016020);; cellular component: membrane part (GO:0044425)
evm.TU.scaffold_1047.220	evm.TU.scaffold_1047.220	2.58824	231	2.53958	262	2.95533	242	0.973298	81	1.70856	152	0.702675	54	0.00356307	-1.00037	down	[V]	Defense mechanisms	Molecular Function: ATP binding (GO:0005524);; Cellular Component: integral component of membrane (GO:0016021);; Molecular Function: ATPase activity (GO:0016887);;	--	--	[Q]	Secondary metabolites biosynthesis, transport and catabolism	ABC-2 type transporter	Pleiotropic drug resistance protein 1 OS=Nicotiana tabacum OX=4097 GN=PDR1 PE=2 SV=1	--	--	pleiotropic drug resistance protein 1 [Artemisia annua]	molecular function: binding (GO:0005488);; cellular component: membrane (GO:0016020);; cellular component: membrane part (GO:0044425);; molecular function: catalytic activity (GO:0003824)
evm.TU.scaffold_5558.3	evm.TU.scaffold_5558.3	3.50251	103	2.4	82	3.04329	83	4.82346	132	5.33248	156	5.35275	136	0.0403031	0.679707	up	[M]	Cell wall/membrane/envelope biogenesis	Molecular Function: catalytic activity (GO:0003824);;	--	--	[M]	Cell wall/membrane/envelope biogenesis	NAD dependent epimerase/dehydratase family	UDP-sulfoquinovose synthase, chloroplastic OS=Spinacia oleracea OX=3562 GN=SQD1 PE=1 SV=1	--	--	NAD-dependent epimerase/dehydratase [Artemisia annua]	molecular function: catalytic activity (GO:0003824)
evm.TU.scaffold_1460.37	evm.TU.scaffold_1460.37	5.6993	217	6.3629	280	4.66279	163	9.60437	338	11.5742	438	10.692	349	0.000157424	0.842642	up	--	--	--	--	--	--	--	--	PLASTID TRANSCRIPTIONALLY ACTIVE protein 6, chloroplastic OS=Arabidopsis thaliana OX=3702 GN=PTAC6 PE=1 SV=1	--	--	hypothetical protein CTI12_AA593440 [Artemisia annua]	--
evm.TU.scaffold_1655.3	evm.TU.scaffold_1655.3	23.585	492	21.7774	526	20.518	394	12.1756	236	10.8542	226	12.3139	221	6.21e-06	-0.846396	down	--	--	Molecular Function: enzyme inhibitor activity (GO:0004857);;	--	--	--	--	Plant invertase/pectin methylesterase inhibitor	21 kDa protein OS=Daucus carota OX=4039 PE=2 SV=1	--	--	pectinesterase inhibitor domain-containing protein [Artemisia annua]	molecular function: molecular function regulator (GO:0098772);; biological process: biological regulation (GO:0065007)
Chrysanthemum_x_morifolium_newGene_41715	--	3.62121	55	1.44439	25	5.70808	79	0.234963	4	0	0	0.663321	9	0.00309744	-1.24746	down	--	--	--	--	--	--	--	--	--	--	--	--	--
evm.TU.scaffold_5841.135	evm.TU.scaffold_5841.135	3.22334	141	3.33606	169	2.57287	104	4.70594	191	4.8225	210	5.06281	191	0.0352178	0.600455	up	[O]	Posttranslational modification, protein turnover, chaperones	Molecular Function: metalloendopeptidase activity (GO:0004222);; Molecular Function: ATP binding (GO:0005524);; Molecular Function: zinc ion binding (GO:0008270);; Cellular Component: integral component of membrane (GO:0016021);; Biological Process: cell division (GO:0051301);;	--	--	[O]	Posttranslational modification, protein turnover, chaperones	ATPase family associated with various cellular activities (AAA)	Probable inactive ATP-dependent zinc metalloprotease FTSHI 3, chloroplastic OS=Arabidopsis thaliana OX=3702 GN=FTSHI3 PE=1 SV=1	--	--	cell division protein ftsH [Artemisia annua]	molecular function: catalytic activity (GO:0003824);; biological process: metabolic process (GO:0008152);; molecular function: binding (GO:0005488);; cellular component: membrane (GO:0016020);; cellular component: membrane part (GO:0044425);; biological process: cellular process (GO:0009987);; biological process: single-organism process (GO:0044699)
evm.TU.scaffold_546.113	evm.TU.scaffold_546.113	6.54403	175	7.14958	221	7.37089	181	11.111	275	11.9081	317	14.1852	326	0.000749756	0.751963	up	[G]	Carbohydrate transport and metabolism	Molecular Function: kinase activity (GO:0016301);; Molecular Function: phosphotransferase activity, alcohol group as acceptor (GO:0016773);;	--	--	[G]	Carbohydrate transport and metabolism	pfkB family carbohydrate kinase	Fructokinase-like 1, chloroplastic OS=Arabidopsis thaliana OX=3702 GN=FLN1 PE=1 SV=1	--	--	Carbohydrate kinase PfkB [Artemisia annua]	molecular function: catalytic activity (GO:0003824)
evm.TU.scaffold_7432.75	evm.TU.scaffold_7432.75	2.97833	124	2.85387	137	1.47321	57	6.51256	250	3.62659	150	4.92671	176	0.0427888	0.803747	up	--	--	Molecular Function: serine-type peptidase activity (GO:0008236);;	--	--	[OR]	Posttranslational modification, protein turnover, chaperones;; General function prediction only	Serine carboxypeptidase S28	Probable serine protease EDA2 OS=Arabidopsis thaliana OX=3702 GN=EDA2 PE=2 SV=2	--	--	alpha/beta-Hydrolases superfamily protein [Artemisia annua]	molecular function: catalytic activity (GO:0003824);; biological process: metabolic process (GO:0008152)
Chrysanthemum_x_morifolium_newGene_50811	--	3.1352	43	3.17604	61	2.51366	34	5.56191	85	4.67368	78	7.52658	107	0.0184604	0.890493	up	--	--	Molecular Function: methyltransferase activity (GO:0008168);; Molecular Function: zinc ion binding (GO:0008270);; Biological Process: methylation (GO:0032259);;	--	--	--	--	--	Protein ENHANCED DOWNY MILDEW 2 OS=Arabidopsis thaliana OX=3702 GN=EDM2 PE=1 SV=1	S	Function unknown	protein ENHANCED DOWNY MILDEW 2-like [Lactuca sativa]	molecular function: catalytic activity (GO:0003824);; molecular function: binding (GO:0005488);; biological process: metabolic process (GO:0008152)
evm.TU.scaffold_1337.114	evm.TU.scaffold_1337.114	11.7326	292	13.1902	380	10.3842	237	20.0798	462	24.4512	604	21.2236	453	3.53e-05	0.826205	up	[I]	Lipid transport and metabolism	Molecular Function: enoyl-[acyl-carrier-protein] reductase (NADH) activity (GO:0004318);; Biological Process: fatty acid biosynthetic process (GO:0006633);;	--	--	[R]	General function prediction only	Enoyl-(Acyl carrier protein) reductase	Enoyl-[acyl-carrier-protein] reductase [NADH], chloroplastic OS=Brassica napus OX=3708 PE=1 SV=2	--	--	enoyl-ACP reductase 1 [Artemisia annua]	molecular function: catalytic activity (GO:0003824);; biological process: metabolic process (GO:0008152);; biological process: single-organism process (GO:0044699);; biological process: cellular process (GO:0009987)
Chrysanthemum_x_morifolium_newGene_18368	--	5.17424	151	7.47898	295	3.32014	124	1.9933	72	3.38898	116	1.26862	42	0.0403278	-0.859256	down	--	--	--	--	--	--	--	--	--	--	--	--	--
Chrysanthemum_x_morifolium_newGene_67392	--	132.137	2605	107.341	2451	81.2904	1474	78.5537	1435	59.3212	1164	58.4875	992	0.0164202	-0.648364	down	--	--	Cellular Component: integral component of membrane (GO:0016021);;	--	--	--	--	--	NDR1/HIN1-like protein 1 OS=Arabidopsis thaliana OX=3702 GN=NHL1 PE=2 SV=1	S	Function unknown	NDR1/HIN1-like protein 1 [Lactuca sativa]	cellular component: membrane (GO:0016020);; cellular component: membrane part (GO:0044425)
evm.TU.scaffold_1170.83	evm.TU.scaffold_1170.83	0.553659	24	0.489992	24	0.496446	20	2.05458	80	1.42155	60	0.90961	33	0.0230213	0.98866	up	--	--	--	--	--	--	--	--	--	--	--	hypothetical protein CTI12_AA044810 [Artemisia annua]	--
Chrysanthemum_x_morifolium_newGene_53570	--	1.07206	21	2.26154	48	0.735198	13	4.14982	74	3.7801	69	4.40961	68	0.0127353	1.04931	up	[O]	Posttranslational modification, protein turnover, chaperones	--	--	--	--	--	--	--	S	Function unknown	uncharacterized protein LOC111893336 isoform X1 [Lactuca sativa]	--
evm.TU.scaffold_5740.32	evm.TU.scaffold_5740.32	3.08139	141	4.08489	217	4.11061	173	5.83987	248	6.83191	311	6.51402	256	0.00498581	0.694542	up	--	--	--	--	--	--	--	--	--	--	--	prefoldin chaperone subunit family protein [Artemisia annua]	--
evm.TU.scaffold_909.60	evm.TU.scaffold_909.60	25.765	982	22.0294	972	20.1655	707	14.198	501	14.1639	537	12.9787	426	0.000309057	-0.682786	down	--	--	Cellular Component: plant-type vacuole (GO:0000325);; Biological Process: cell morphogenesis (GO:0000902);; Molecular Function: molecular_function (GO:0003674);; Molecular Function: transporter activity (GO:0005215);; Cellular Component: cellular_component (GO:0005575);; Cellular Component: intracellular (GO:0005622);; Cellular Component: cell (GO:0005623);; Cellular Component: cytoplasm (GO:0005…	--	--	--	--	EamA-like transporter family	Protein WALLS ARE THIN 1 OS=Arabidopsis thaliana OX=3702 GN=WAT1 PE=1 SV=1	--	--	walls Are Thin 1 [Artemisia annua]	cellular component: cell (GO:0005623);; cellular component: organelle (GO:0043226);; cellular component: cell part (GO:0044464);; biological process: cellular process (GO:0009987);; biological process: developmental process (GO:0032502);; biological process: single-organism process (GO:0044699);; biological process: cellular component organization or biogenesis (GO:0071840);; molecular function: …
evm.TU.scaffold_1275.155	evm.TU.scaffold_1275.155	4.75562	205	4.09133	204	5.32665	211	2.74933	110	2.89746	124	2.62879	98	0.0116465	-0.693931	down	--	--	--	--	--	--	--	--	--	--	--	--	--
Chrysanthemum_x_morifolium_newGene_103370	--	12.8216	119	11.0465	132	16.2101	157	2.31418	23	5.31316	57	6.87371	64	0.0162219	-0.983706	down	--	--	--	--	--	--	--	--	--	--	--	--	--
evm.TU.scaffold_2953.8	evm.TU.scaffold_2953.8	20.0317	282	19.2745	315	14.5091	188	10.0762	132	9.37671	132	11.0511	134	0.00754238	-0.735586	down	--	--	--	--	--	--	--	Thioredoxin	--	--	--	thioredoxin superfamily protein [Artemisia annua]	--
evm.TU.scaffold_1112.17	evm.TU.scaffold_1112.17	29.8209	755	32.1566	943	24.4214	569	58.9651	1383	35.6584	899	44.4062	967	0.0259925	0.613012	up	[M]	Cell wall/membrane/envelope biogenesis	Molecular Function: catalytic activity (GO:0003824);;	--	--	--	--	NAD dependent epimerase/dehydratase family	Chloroplast stem-loop binding protein of 41 kDa a, chloroplastic OS=Arabidopsis thaliana OX=3702 GN=CSP41A PE=1 SV=1	--	--	hypothetical protein CTI12_AA426160 [Artemisia annua]	molecular function: catalytic activity (GO:0003824)
Chrysanthemum_x_morifolium_newGene_92734	--	4.67757	64	5.81784	91	3.36137	42	13.6776	172	7.24564	98	9.79962	114	0.0232762	0.878756	up	--	--	--	--	--	--	--	--	--	--	--	--	--
evm.TU.scaffold_774.462	evm.TU.scaffold_774.462	3.9373	285	4.01478	337	4.13147	275	2.751	185	2.52604	182	2.35368	147	0.00609282	-0.61793	down	--		Molecular Function: protein kinase activity (GO:0004672);; Molecular Function: ATP binding (GO:0005524);; Cellular Component: integral component of membrane (GO:0016021);;	--	--	--	--	Protein tyrosine and serine/threonine kinase	Leucine-rich repeat receptor-like serine/threonine-protein kinase BAM1 OS=Arabidopsis thaliana OX=3702 GN=BAM1 PE=1 SV=1	--	--	Leucine-rich repeat-containing protein [Artemisia annua]	molecular function: catalytic activity (GO:0003824);; biological process: metabolic process (GO:0008152);; biological process: cellular process (GO:0009987);; molecular function: binding (GO:0005488);; cellular component: membrane (GO:0016020);; cellular component: membrane part (GO:0044425)
evm.TU.scaffold_1583.10	evm.TU.scaffold_1583.10	7.12461	562	8.2627	754	7.60749	552	12.2274	893	13.7806	1081	13.7511	932	5.58e-07	0.751588	up	--	--	Molecular Function: GTP binding (GO:0005525);; Molecular Function: hydrolase activity, acting on acid anhydrides (GO:0016817);;	--	--	--	--	Translocase of chloroplast 159/132, membrane anchor domain	Translocase of chloroplast 159, chloroplastic OS=Arabidopsis thaliana OX=3702 GN=TOC159 PE=1 SV=1	--	--	AIG1-like protein [Artemisia annua]	molecular function: binding (GO:0005488);; molecular function: catalytic activity (GO:0003824)
evm.TU.scaffold_6090.25	evm.TU.scaffold_6090.25	0.736026	22	0.76033	27	1.09985	30	1.89888	53	1.91688	57	2.6107	67	0.0197134	0.95127	up	[R]	General function prediction only	Molecular Function: transferase activity (GO:0016740);;	--	--	--	--	Tetratricopeptide repeat	protein SLOW GREEN 1, chloroplastic OS=Arabidopsis thaliana OX=3702 GN=SG1 PE=1 SV=1	--	--	protein prenylyltransferase superfamily protein [Artemisia annua]	molecular function: catalytic activity (GO:0003824)
evm.TU.scaffold_1109.67	evm.TU.scaffold_1109.67	7.17638	183	7.1088	210	7.61893	179	4.30272	102	5.33703	136	3.46785	76	0.0417113	-0.647239	down	[T]	Signal transduction mechanisms	Molecular Function: protein serine/threonine kinase activity (GO:0004674);; Molecular Function: ATP binding (GO:0005524);;	--	--	--	--	Protein kinase domain	Cysteine-rich receptor-like protein kinase 8 OS=Arabidopsis thaliana OX=3702 GN=CRK8 PE=3 SV=2	--	--	hypothetical protein E3N88_04587 [Mikania micrantha]	molecular function: catalytic activity (GO:0003824);; biological process: metabolic process (GO:0008152);; biological process: cellular process (GO:0009987);; molecular function: binding (GO:0005488)
evm.TU.scaffold_1374.150	evm.TU.scaffold_1374.150	8.55324	154	9.35103	195	10.5377	175	4.39306	74	5.72957	103	5.99409	93	0.0179521	-0.715735	down	--	--	--	--	--	--	--	--	--	--	--	hypothetical protein Ccrd_000407 [Cynara cardunculus var. scolymus]	--
Chrysanthemum_x_morifolium_newGene_32388	--	3.02529	69	1.40072	50	2.71411	42	0.262672	8	0.188387	6	0.535218	10	5.95e-05	-1.54346	down	--	--	--	--	--	[R]	General function prediction only	Ankyrin repeats (many copies);; Ankyrin repeats (3 copies);; Ankyrin repeat;; Ankyrin repeat	--	S	Function unknown	hypothetical protein LSAT_8X106801 [Lactuca sativa]	--
evm.TU.scaffold_193.58	evm.TU.scaffold_193.58	266.298	6411	212.777	5932	148.52	3289	151.641	3382	119.042	2853	131.597	2725	0.0439347	-0.586545	down	--	--	Biological Process: response to water (GO:0009415);;	--	--	--	--	Dehydrin	Dehydrin COR47 OS=Arabidopsis thaliana OX=3702 GN=COR47 PE=1 SV=2	--	--	cold-regulated 47 [Artemisia annua]	biological process: response to stimulus (GO:0050896)
evm.TU.scaffold_1554.165	evm.TU.scaffold_1554.165	9.16186	364	9.65162	445	12.189	446	6.14614	227	6.11823	242	4.99328	171	0.000605717	-0.775608	down	[I]	Lipid transport and metabolism	Cellular Component: integral component of membrane (GO:0016021);; Molecular Function: hydrolase activity (GO:0016787);;	--	--	[R]	General function prediction only	alpha/beta hydrolase fold	Probable lysophospholipase BODYGUARD 3 OS=Arabidopsis thaliana OX=3702 GN=BDG3 PE=2 SV=1	--	--	alpha/beta-Hydrolases superfamily protein [Artemisia annua]	cellular component: membrane (GO:0016020);; cellular component: membrane part (GO:0044425);; molecular function: catalytic activity (GO:0003824)
evm.TU.scaffold_45.62	evm.TU.scaffold_45.62	0.109533	4	0.140495	6	0.164421	6	0.547415	18	0.565714	19	0.852443	25	0.0433251	0.97535	up	[G]	Carbohydrate transport and metabolism	Molecular Function: sugar:proton symporter activity (GO:0005351);; Cellular Component: integral component of plasma membrane (GO:0005887);; Biological Process: glucose import (GO:0046323);;	--	--	[R]	General function prediction only	Sugar (and other) transporter	Sugar transporter ERD6-like 7 OS=Arabidopsis thaliana OX=3702 GN=At2g48020 PE=2 SV=2	--	--	sugar transporter ERD6-like 7 [Helianthus annuus]	molecular function: transporter activity (GO:0005215);; biological process: single-organism process (GO:0044699);; biological process: localization (GO:0051179);; cellular component: cell (GO:0005623);; cellular component: membrane (GO:0016020);; cellular component: membrane part (GO:0044425);; cellular component: cell part (GO:0044464)
evm.TU.scaffold_317.198	evm.TU.scaffold_317.198	0.857353	29	1.02632	40	2.08464	64	3.75376	115	3.48127	115	4.47359	128	0.00128362	1.16385	up	[C]	Energy production and conversion	Molecular Function: FMN binding (GO:0010181);; Molecular Function: oxidoreductase activity (GO:0016491);;	--	--	[CR]	Energy production and conversion;; General function prediction only	NADH:flavin oxidoreductase / NADH oxidase family	Putative 12-oxophytodienoate reductase 11 OS=Oryza sativa subsp. japonica OX=39947 GN=OPR11 PE=2 SV=1	--	--	12-oxophytodienoate reductase 2 [Helianthus annuus]	molecular function: binding (GO:0005488);; molecular function: catalytic activity (GO:0003824)
evm.TU.scaffold_1697.37	evm.TU.scaffold_1697.37	8.46246	144	8.82776	174	9.80627	153	5.00664	79	6.43813	109	4.66219	68	0.0451432	-0.652824	down	--	--	--	--	--	--	--	--	--	--	--	--	--
evm.TU.scaffold_6275.93	evm.TU.scaffold_6275.93	77.1141	3123	78.3905	3676	58.0117	2161	47.7867	1793	44.7429	1804	31.611	1101	0.00236779	-0.72248	down	[QV]	Secondary metabolites biosynthesis, transport and catabolism;; Defense mechanisms	Molecular Function: monooxygenase activity (GO:0004497);; Molecular Function: iron ion binding (GO:0005506);; Cellular Component: integral component of membrane (GO:0016021);; Molecular Function: oxidoreductase activity, acting on paired donors, with incorporation or reduction of molecular oxygen (GO:0016705);; Molecular Function: heme binding (GO:0020037);;	--	--	[QI]	Secondary metabolites biosynthesis, transport and catabolism;; Lipid transport and metabolism	Cytochrome P450	Cytochrome P450 86A22 OS=Petunia hybrida OX=4102 GN=CYP86A22 PE=1 SV=1	--	--	cytochrome P450 86A22 [Artemisia annua]	molecular function: catalytic activity (GO:0003824);; biological process: metabolic process (GO:0008152);; biological process: single-organism process (GO:0044699);; molecular function: binding (GO:0005488);; cellular component: membrane (GO:0016020);; cellular component: membrane part (GO:0044425)
evm.TU.scaffold_3711.87	evm.TU.scaffold_3711.87	2.98099	349	3.51121	476	2.67951	289	4.85349	526	4.84539	564	5.5613	559	0.000961877	0.677096	up	--	--	--	--	--	[R]	General function prediction only	Tetratricopeptide repeat	Protein TSS OS=Arabidopsis thaliana OX=3702 GN=TSS PE=1 SV=1	--	--	tetratricopeptide repeat (TPR)-like superfamily protein [Artemisia annua]	--
Chrysanthemum_x_morifolium_newGene_34631	--	3.50314	63	3.76595	78	3.63782	60	1.0981	19	1.68319	30	0.868704	14	0.00414075	-1.11021	down	--	--	--	--	--	--	--	--	--	--	--	--	--
evm.TU.scaffold_1465.140	evm.TU.scaffold_1465.140	7.05415	160	8.38958	220	9.65801	201	15.8164	332	12.5774	283	15.1034	294	0.00324027	0.71897	up	[G]	Carbohydrate transport and metabolism	Biological Process: inositol biosynthetic process (GO:0006021);; Molecular Function: inositol monophosphate 1-phosphatase activity (GO:0008934);; Biological Process: phosphatidylinositol phosphorylation (GO:0046854);; Biological Process: inositol phosphate dephosphorylation (GO:0046855);; Molecular Function: metal ion binding (GO:0046872);; Molecular Function: inositol monophosphate 3-phosphatase…	--	--	[G]	Carbohydrate transport and metabolism	Inositol monophosphatase family	Phosphatase IMPL1, chloroplastic OS=Arabidopsis thaliana OX=3702 GN=IMPL1 PE=1 SV=2	--	--	myo-inositol monophosphatase like 1 [Artemisia annua]	biological process: metabolic process (GO:0008152);; biological process: cellular process (GO:0009987);; biological process: single-organism process (GO:0044699);; molecular function: catalytic activity (GO:0003824);; molecular function: binding (GO:0005488)
evm.TU.scaffold_1759.73	evm.TU.scaffold_1759.73	4.48147	226	4.91293	287	4.15101	193	9.44877	442	6.5225	328	7.18014	312	0.00619576	0.695778	up	[O]	Posttranslational modification, protein turnover, chaperones	Molecular Function: metalloendopeptidase activity (GO:0004222);; Molecular Function: ATP binding (GO:0005524);; Cellular Component: integral component of membrane (GO:0016021);;	--	--	[O]	Posttranslational modification, protein turnover, chaperones	Peptidase family M41	ATP-dependent zinc metalloprotease FTSH, chloroplastic OS=Nicotiana tabacum OX=4097 GN=FTSH PE=2 SV=2	--	--	ATP-dependent metalloprotease FtsH [Chrysanthemum x morifolium]	molecular function: catalytic activity (GO:0003824);; biological process: metabolic process (GO:0008152);; molecular function: binding (GO:0005488);; cellular component: membrane (GO:0016020);; cellular component: membrane part (GO:0044425)
evm.TU.scaffold_460.138	evm.TU.scaffold_460.138	17.4605	235	18.3286	286	16.5555	205	33.9418	424	29.832	400	30.4172	352	2.42e-05	0.789798	up	[J]	Translation, ribosomal structure and biogenesis	Molecular Function: structural constituent of ribosome (GO:0003735);; Cellular Component: ribosome (GO:0005840);; Biological Process: translation (GO:0006412);;	--	--	[J]	Translation, ribosomal structure and biogenesis	Ribosomal protein L17	50S ribosomal protein L17, chloroplastic OS=Nicotiana tabacum OX=4097 GN=RPL17 PE=2 SV=1	--	--	50S ribosomal protein L17 protein [Artemisia annua]	molecular function: structural molecule activity (GO:0005198);; cellular component: cell (GO:0005623);; cellular component: macromolecular complex (GO:0032991);; cellular component: organelle (GO:0043226);; cellular component: cell part (GO:0044464);; biological process: metabolic process (GO:0008152);; biological process: cellular process (GO:0009987)
Chrysanthemum_x_morifolium_newGene_32949	--	11.7026	173	9.30262	158	13.4413	183	6.79671	93	6.31937	93	6.90249	87	0.0316131	-0.684976	down	--	--	--	--	--	--	--	--	--	--	--	--	--
Chrysanthemum_x_morifolium_newGene_8270	--	1.54978	54	1.70587	68	2.65227	54	0.603515	28	0.491148	22	0.345793	15	0.0268669	-0.93088	down	--	--	--	--	--	--	--	--	--	--	--	--	--
evm.TU.scaffold_1046.336	evm.TU.scaffold_1046.336	7.22823	166	7.88778	210	8.56263	181	18.6333	396	21.3464	487	21.3528	421	2.02e-13	1.27655	up	[O]	Posttranslational modification, protein turnover, chaperones	Molecular Function: ATP binding (GO:0005524);; Biological Process: protein refolding (GO:0042026);;	--	--	[O]	Posttranslational modification, protein turnover, chaperones	TCP-1/cpn60 chaperonin family	Chaperonin 60 subunit alpha 1, chloroplastic OS=Arabidopsis thaliana OX=3702 GN=CPN60A1 PE=1 SV=2	--	--	RuBisCO large subunit-binding protein subunit alpha [Artemisia annua]	molecular function: binding (GO:0005488);; biological process: cellular process (GO:0009987)
evm.TU.scaffold_832.3	evm.TU.scaffold_832.3	8.5444	142	4.72396	91	4.86122	74	3.10459	48	2.21414	37	2.63701	38	0.0310433	-0.885747	down	--	--	Biological Process: response to auxin (GO:0009733);;	--	--	--	--	Auxin responsive protein	Auxin-responsive protein SAUR72 OS=Arabidopsis thaliana OX=3702 GN=SAUR72 PE=1 SV=1	--	--	small auxin-up RNA [Artemisia annua]	biological process: response to stimulus (GO:0050896)
evm.TU.scaffold_16.85	evm.TU.scaffold_16.85	2.75112	60	3.96281	100	3.3767	68	8.00227	161	6.39564	138	6.83742	128	0.00222385	0.90793	up	[Q]	Secondary metabolites biosynthesis, transport and catabolism	Molecular Function: lactoylglutathione lyase activity (GO:0004462);; Cellular Component: cytoplasm (GO:0005737);; Biological Process: methylglyoxal catabolic process to D-lactate via S-lactoyl-glutathione (GO:0019243);; Molecular Function: metal ion binding (GO:0046872);; Molecular Function: dioxygenase activity (GO:0051213);;	--	--	[G]	Carbohydrate transport and metabolism	Glyoxalase/Bleomycin resistance protein/Dioxygenase superfamily	Probable lactoylglutathione lyase, chloroplastic OS=Arabidopsis thaliana OX=3702 GN=At1g67280 PE=1 SV=1	--	--	probable lactoylglutathione lyase, chloroplastic [Cynara cardunculus var. scolymus]	molecular function: catalytic activity (GO:0003824);; cellular component: cell (GO:0005623);; cellular component: cell part (GO:0044464);; biological process: metabolic process (GO:0008152);; biological process: cellular process (GO:0009987);; biological process: single-organism process (GO:0044699);; molecular function: binding (GO:0005488)
evm.TU.scaffold_1531.107	evm.TU.scaffold_1531.107	16.2044	190	12.5734	170	18.6614	201	3.61824	40	7.62976	89	3.1953	33	0.000174269	-1.28668	down	--	--	Cellular Component: apoplast (GO:0048046);;	--	--	--	--	Dirigent-like protein	Dirigent protein 21 OS=Arabidopsis thaliana OX=3702 GN=DIR21 PE=3 SV=1	--	--	plant disease resistance response protein [Artemisia annua]	cellular component: extracellular region (GO:0005576)
evm.TU.scaffold_549.9	evm.TU.scaffold_549.9	3.4959	157	4.01945	209	5.15772	213	1.88126	79	2.52891	113	1.4554	57	0.00419643	-0.918412	down	--	--	Molecular Function: kinase activity (GO:0016301);; Biological Process: intracellular signal transduction (GO:0035556);;	--	--	--	--	C1 domain	--	--	--	protein kinase C-like, phorbol ester/diacylglycerol-binding domain, DC1 [Artemisia annua]	molecular function: catalytic activity (GO:0003824);; biological process: cellular process (GO:0009987);; biological process: signaling (GO:0023052);; biological process: single-organism process (GO:0044699);; biological process: response to stimulus (GO:0050896);; biological process: biological regulation (GO:0065007)
evm.TU.scaffold_901.100	evm.TU.scaffold_901.100	0.366318	9	0.90169	26	0.777109	18	2.66671	61	1.63053	40	3.91814	83	0.00413137	1.20608	up	[IQR]	Lipid transport and metabolism;; Secondary metabolites biosynthesis, transport and catabolism;; General function prediction only	Molecular Function: 3-oxoacyl-[acyl-carrier-protein] reductase (NADPH) activity (GO:0004316);; Biological Process: fatty acid biosynthetic process (GO:0006633);; Cellular Component: chloroplast (GO:0009507);; Molecular Function: NAD binding (GO:0051287);; Molecular Function: 3-oxo-glutaryl-[acp] methyl ester reductase activity (GO:0102131);; Molecular Function: 3-oxo-pimeloyl-[acp] methyl ester r…	--	--	[I]	Lipid transport and metabolism	Enoyl-(Acyl carrier protein) reductase	3-oxoacyl-[acyl-carrier-protein] reductase, chloroplastic OS=Cuphea lanceolata OX=3930 GN=CLKR27 PE=2 SV=1	--	--	ketoacyl-ACP reductase 1 [Artemisia annua]	molecular function: catalytic activity (GO:0003824);; biological process: metabolic process (GO:0008152);; biological process: single-organism process (GO:0044699);; biological process: cellular process (GO:0009987);; cellular component: cell (GO:0005623);; cellular component: organelle (GO:0043226);; cellular component: cell part (GO:0044464);; molecular function: binding (GO:0005488)
evm.TU.scaffold_20.46	evm.TU.scaffold_20.46	4.10898	171	3.55395	171	4.40824	169	2.38595	92	2.59626	108	2.30943	83	0.0333831	-0.642321	down	--	--	Molecular Function: calmodulin binding (GO:0005516);; Biological Process: defense response (GO:0006952);; Biological Process: response to biotic stimulus (GO:0009607);; Cellular Component: integral component of membrane (GO:0016021);;	--	--	--	--	Mlo family	MLO-like protein 4 OS=Arabidopsis thaliana OX=3702 GN=MLO4 PE=2 SV=2	--	--	mlo-related protein [Artemisia annua]	molecular function: binding (GO:0005488);; biological process: response to stimulus (GO:0050896);; cellular component: membrane (GO:0016020);; cellular component: membrane part (GO:0044425)
evm.TU.scaffold_5594.1	evm.TU.scaffold_5594.1	0.517273	13	1.15595	33	1.24017	28	4.4185	101	2.98956	74	4.35129	92	4.85e-05	1.43759	up	[IQR]	Lipid transport and metabolism;; Secondary metabolites biosynthesis, transport and catabolism;; General function prediction only	Molecular Function: 3-oxoacyl-[acyl-carrier-protein] reductase (NADPH) activity (GO:0004316);; Biological Process: fatty acid biosynthetic process (GO:0006633);; Cellular Component: chloroplast (GO:0009507);; Molecular Function: NAD binding (GO:0051287);; Molecular Function: 3-oxo-glutaryl-[acp] methyl ester reductase activity (GO:0102131);; Molecular Function: 3-oxo-pimeloyl-[acp] methyl ester r…	--	--	[I]	Lipid transport and metabolism	Enoyl-(Acyl carrier protein) reductase	3-oxoacyl-[acyl-carrier-protein] reductase, chloroplastic OS=Cuphea lanceolata OX=3930 GN=CLKR27 PE=2 SV=1	--	--	ketoacyl-ACP reductase 1 [Artemisia annua]	molecular function: catalytic activity (GO:0003824);; biological process: metabolic process (GO:0008152);; biological process: single-organism process (GO:0044699);; biological process: cellular process (GO:0009987);; cellular component: cell (GO:0005623);; cellular component: organelle (GO:0043226);; cellular component: cell part (GO:0044464);; molecular function: binding (GO:0005488)
evm.TU.scaffold_11355.93	evm.TU.scaffold_11355.93	23.3838	715	25.1287	890	23.8924	672	37.3637	1058	37.8476	1152	37.0755	975	5.38e-06	0.607757	up	[E]	Amino acid transport and metabolism	Molecular Function: transaminase activity (GO:0008483);; Biological Process: biosynthetic process (GO:0009058);; Molecular Function: pyridoxal phosphate binding (GO:0030170);;	--	--	[E]	Amino acid transport and metabolism	Aminotransferase class I and II	LL-diaminopimelate aminotransferase, chloroplastic OS=Arabidopsis thaliana OX=3702 GN=DAP PE=1 SV=1	--	--	pyridoxal phosphate (PLP)-dependent transferases superfamily protein [Artemisia annua]	molecular function: catalytic activity (GO:0003824);; biological process: metabolic process (GO:0008152);; molecular function: binding (GO:0005488)
evm.TU.scaffold_518.238	evm.TU.scaffold_518.238	0	0	0.112743	4	0.068868	2	1.16516	33	0.842106	26	0.719905	19	0.000462848	1.42319	up	[IQ]	Lipid transport and metabolism;; Secondary metabolites biosynthesis, transport and catabolism	Biological Process: fatty acid biosynthetic process (GO:0006633);; Molecular Function: transferase activity, transferring acyl groups other than amino-acyl groups (GO:0016747);;	--	--	[IQ]	Lipid transport and metabolism;; Secondary metabolites biosynthesis, transport and catabolism	Beta-ketoacyl synthase, N-terminal domain	3-oxoacyl-[acyl-carrier-protein] synthase I, chloroplastic OS=Arabidopsis thaliana OX=3702 GN=KAS1 PE=1 SV=2	--	--	plastid 3-keto-acyl-ACP synthase I [Artemisia annua]	biological process: metabolic process (GO:0008152);; biological process: cellular process (GO:0009987);; biological process: single-organism process (GO:0044699);; molecular function: catalytic activity (GO:0003824)
evm.TU.scaffold_2409.3	evm.TU.scaffold_2409.3	2.45735	39	4.5469	84	3.01108	44	7.50131	111	8.2828	131	5.79344	79	0.0243018	0.862116	up	[U]	Intracellular trafficking, secretion, and vesicular transport	Molecular Function: GTPase activity (GO:0003924);; Molecular Function: GTP binding (GO:0005525);; Biological Process: SRP-dependent cotranslational protein targeting to membrane (GO:0006614);; Molecular Function: 7S RNA binding (GO:0008312);; Cellular Component: signal recognition particle (GO:0048500);;	--	--	[U]	Intracellular trafficking, secretion, and vesicular transport	SRP54-type protein, GTPase domain	Signal recognition particle 54 kDa protein, chloroplastic OS=Arabidopsis thaliana OX=3702 GN=FFC PE=1 SV=1	--	--	chloroplast signal recognition particle 54 kDa subunit [Artemisia annua]	molecular function: catalytic activity (GO:0003824);; molecular function: binding (GO:0005488);; biological process: localization (GO:0051179);; cellular component: cell (GO:0005623);; cellular component: macromolecular complex (GO:0032991);; cellular component: cell part (GO:0044464)
evm.TU.scaffold_1102.111	evm.TU.scaffold_1102.111	2.91033	117	4.31504	200	4.54225	167	7.90404	293	8.91158	355	11.4313	393	1.27e-05	1.10598	up	--	--	Molecular Function: protein dimerization activity (GO:0046983);;	--	--	--	--	Helix-loop-helix DNA-binding domain	Transcription factor ICE1 OS=Arabidopsis thaliana OX=3702 GN=SCRM PE=1 SV=1	--	--	ICE1 [Chrysanthemum dichroum]	molecular function: binding (GO:0005488)
evm.TU.scaffold_6149.110	evm.TU.scaffold_6149.110	5.04915	111	4.10487	105	3.33525	68	10.4615	213	10.3677	226	8.53043	161	8.53e-05	1.05529	up	[J]	Translation, ribosomal structure and biogenesis	Molecular Function: RNA binding (GO:0003723);;	--	--	[R]	General function prediction only	RNA recognition motif. (a.k.a. RRM, RBD, or RNP domain)	30S ribosomal protein 2, chloroplastic OS=Spinacia oleracea OX=3562 GN=PSRP2 PE=1 SV=1	--	--	RNA-binding (RRM/RBD/RNP motifs) family protein [Artemisia annua]	molecular function: binding (GO:0005488)
evm.TU.scaffold_515.15	evm.TU.scaffold_515.15	27.7185	100	38.107	158	43.4538	144	82.2354	273	69.655	249	48.8172	151	0.0277629	0.740695	up	--	--	--	--	--	--	--	S-adenosyl-l-methionine decarboxylase leader peptide	--	--	--	hypothetical protein E3N88_37696 [Mikania micrantha]	--
evm.TU.scaffold_1530.7	evm.TU.scaffold_1530.7	1.57725	55	1.0963	44	2.59639	83	3.46271	112	3.54704	123	4.09413	122	0.0382334	0.8329	up	--	--	Molecular Function: monooxygenase activity (GO:0004497);; Molecular Function: iron ion binding (GO:0005506);; Molecular Function: oxidoreductase activity, acting on paired donors, with incorporation or reduction of molecular oxygen (GO:0016705);; Molecular Function: heme binding (GO:0020037);;	--	--	--	--	Cytochrome P450	Allene oxide synthase 3 OS=Solanum lycopersicum OX=4081 GN=AOS3 PE=1 SV=1	--	--	cytochrome P450 [Artemisia annua]	molecular function: catalytic activity (GO:0003824);; biological process: metabolic process (GO:0008152);; biological process: single-organism process (GO:0044699);; molecular function: binding (GO:0005488)
evm.TU.scaffold_10124.129	evm.TU.scaffold_10124.129	33.872	715	29.5042	722	30.3788	590	22.2409	435	14.821	312	19.3963	353	0.00369687	-0.679019	down	--	--	Molecular Function: RNA polymerase II regulatory region sequence-specific DNA binding (GO:0000977);; Molecular Function: transcription factor activity, sequence-specific DNA binding (GO:0003700);; Cellular Component: nucleus (GO:0005634);; Biological Process: positive regulation of transcription from RNA polymerase II promoter (GO:0045944);; Molecular Function: protein dimerization activity (GO:0…	--	--	[K]	Transcription	K-box region	Agamous-like MADS-box protein AP1 OS=Vitis vinifera OX=29760 GN=AP1 PE=2 SV=1	--	--	AP1-like protein [Chrysanthemum lavandulifolium]	molecular function: binding (GO:0005488);; molecular function: nucleic acid binding transcription factor activity (GO:0001071);; biological process: biological regulation (GO:0065007);; cellular component: cell (GO:0005623);; cellular component: organelle (GO:0043226);; cellular component: cell part (GO:0044464)
evm.TU.scaffold_7432.67	evm.TU.scaffold_7432.67	0.33371	13	0.39122	18	0.26832	10	0.958483	35	0.96792	38	1.12329	38	0.0204044	1.02232	up	--	--	Molecular Function: DNA binding (GO:0003677);; Cellular Component: nucleus (GO:0005634);;	--	--	--	--	B3 DNA binding domain	B3 domain-containing protein At2g36080 OS=Arabidopsis thaliana OX=3702 GN=ARF31 PE=2 SV=1	--	--	DNA-binding pseudobarrel domain-containing protein [Artemisia annua]	molecular function: binding (GO:0005488);; cellular component: cell (GO:0005623);; cellular component: organelle (GO:0043226);; cellular component: cell part (GO:0044464)
evm.TU.scaffold_1270.29	evm.TU.scaffold_1270.29	5.2855	327	6.60472	473	6.85999	391	8.85371	508	12.3651	762	8.89338	473	0.0141848	0.623001	up	[L]	Replication, recombination and repair	Molecular Function: DNA binding (GO:0003677);; Molecular Function: DNA helicase activity (GO:0003678);; Molecular Function: ATP binding (GO:0005524);; Cellular Component: nucleus (GO:0005634);; Biological Process: DNA replication initiation (GO:0006270);; Cellular Component: MCM complex (GO:0042555);;	--	--	[L]	Replication, recombination and repair	MCM P-loop domain	DNA replication licensing factor MCM4 OS=Oryza sativa subsp. japonica OX=39947 GN=MCM4 PE=3 SV=2	--	--	minichromosome maintenance (MCM2/3/5) family protein [Artemisia annua]	molecular function: binding (GO:0005488);; molecular function: catalytic activity (GO:0003824);; cellular component: cell (GO:0005623);; cellular component: organelle (GO:0043226);; cellular component: cell part (GO:0044464);; biological process: metabolic process (GO:0008152);; biological process: cellular process (GO:0009987);; cellular component: macromolecular complex (GO:0032991)
evm.TU.scaffold_4258.76	evm.TU.scaffold_4258.76	12.8743	556	9.37236	469	4.78911	191	3.65076	146	2.23706	97	4.25046	158	0.00343999	-1.07928	down	--	--	Biological Process: biological_process (GO:0008150);; Biological Process: response to radiation (GO:0009314);; Biological Process: response to light stimulus (GO:0009416);; Biological Process: response to abiotic stimulus (GO:0009628);; Biological Process: response to endogenous stimulus (GO:0009719);; Biological Process: response to hormone (GO:0009725);; Biological Process: response to auxin (G…	--	--	--	--	GH3 auxin-responsive promoter	Jasmonoyl--L-amino acid synthetase JAR4 OS=Nicotiana attenuata OX=49451 GN=JAR4 PE=1 SV=1	--	--	indole-3-acetic acid-amido synthetase GH3.5 [Artemisia annua]	biological process: response to stimulus (GO:0050896)
evm.TU.scaffold_2990.32	evm.TU.scaffold_2990.32	40.7296	797	42.1718	956	41.2083	742	26.5079	481	21.2199	414	27.9057	470	0.000199682	-0.68065	down	[R]	General function prediction only	Cellular Component: integral component of membrane (GO:0016021);; Molecular Function: oxidoreductase activity (GO:0016491);;	--	--	[Q]	Secondary metabolites biosynthesis, transport and catabolism	short chain dehydrogenase	11-beta-hydroxysteroid dehydrogenase-like 4A OS=Arabidopsis thaliana OX=3702 GN=HSD4 PE=2 SV=1	--	--	glucose/ribitol dehydrogenase [Artemisia annua]	cellular component: membrane (GO:0016020);; cellular component: membrane part (GO:0044425);; molecular function: catalytic activity (GO:0003824)
evm.TU.scaffold_11321.101	evm.TU.scaffold_11321.101	121.539	3541	121.016	4083	102.492	2747	282.183	7616	127.225	3690	174.145	4363	0.0478569	0.651183	up	[G]	Carbohydrate transport and metabolism	Molecular Function: fructose-bisphosphate aldolase activity (GO:0004332);; Biological Process: glycolytic process (GO:0006096);;	--	--	[G]	Carbohydrate transport and metabolism	Fructose-bisphosphate aldolase class-I	Fructose-bisphosphate aldolase 2, chloroplastic OS=Arabidopsis thaliana OX=3702 GN=FBA2 PE=1 SV=2	--	--	fructose-bisphosphate aldolase, class-I [Artemisia annua]	molecular function: catalytic activity (GO:0003824);; biological process: metabolic process (GO:0008152);; biological process: cellular process (GO:0009987);; biological process: single-organism process (GO:0044699)
evm.TU.scaffold_11225.7	evm.TU.scaffold_11225.7	2.70103	120	1.86373	96	2.43398	99	0.804686	33	0.830925	37	0.532416	21	9.58e-05	-1.2945	down	[T]	Signal transduction mechanisms	Molecular Function: ATP binding (GO:0005524);; Cellular Component: integral component of membrane (GO:0016021);; Molecular Function: ATPase activity (GO:0016887);;	--	--	[Q]	Secondary metabolites biosynthesis, transport and catabolism	ABC-2 type transporter	ABC transporter G family member 20 OS=Arabidopsis thaliana OX=3702 GN=ABCG20 PE=2 SV=1	--	--	ABC-2 type transporter family protein [Artemisia annua]	molecular function: binding (GO:0005488);; cellular component: membrane (GO:0016020);; cellular component: membrane part (GO:0044425);; molecular function: catalytic activity (GO:0003824)
evm.TU.scaffold_1403.9	evm.TU.scaffold_1403.9	1533.45	27448	1360.94	28212	873.651	14383	621.948	10314	633.274	11285	449.893	6925	2.2e-05	-1.02901	down	--	--	--	--	--	--	--	--	--	--	--	RNA-binding protein Lupus La [Artemisia annua]	--
evm.TU.scaffold_927.50	evm.TU.scaffold_927.50	16.6297	401	18.6976	522	18.0149	399	4.54454	102	7.32225	176	4.39281	91	5.75e-11	-1.50811	down	[Q]	Secondary metabolites biosynthesis, transport and catabolism	Biological Process: biosynthetic process (GO:0009058);; Molecular Function: transferase activity, transferring acyl groups other than amino-acyl groups (GO:0016747);;	--	--	--	--	Chalcone and stilbene synthases, N-terminal domain	Chalcone synthase 2 OS=Camellia sinensis OX=4442 GN=CHS2 PE=2 SV=1	--	--	chalcone synthase [Artemisia annua]	biological process: metabolic process (GO:0008152);; molecular function: catalytic activity (GO:0003824)
evm.TU.scaffold_5723.77	evm.TU.scaffold_5723.77	231.265	5486	235.105	6459	196.007	4277	457.397	10053	287.647	6793	329.522	6722	0.00644381	0.637585	up	--	--	Cellular Component: photosystem I reaction center (GO:0009538);; Biological Process: photosynthesis (GO:0015979);;	--	--	--	--	Photosystem I reaction centre subunit III	Photosystem I reaction center subunit III, chloroplastic OS=Flaveria trinervia OX=4227 GN=PSAF PE=2 SV=1	--	--	hypothetical protein CTI12_AA375450 [Artemisia annua]	cellular component: cell (GO:0005623);; cellular component: membrane (GO:0016020);; cellular component: macromolecular complex (GO:0032991);; cellular component: membrane part (GO:0044425);; cellular component: cell part (GO:0044464);; biological process: metabolic process (GO:0008152);; biological process: cellular process (GO:0009987)
evm.TU.scaffold_7990.207	evm.TU.scaffold_7990.207	0.609209	36	0.710641	49	0.643633	35	1.12123	62	1.61905	95	1.38232	70	0.0295601	0.83641	up	[L]	Replication, recombination and repair	Molecular Function: nucleic acid binding (GO:0003676);; Molecular Function: ATP binding (GO:0005524);; Biological Process: DNA replication (GO:0006260);; Biological Process: DNA repair (GO:0006281);; Biological Process: DNA recombination (GO:0006310);; Molecular Function: 3'-5' DNA helicase activity (GO:0043138);;	--	--	[L]	Replication, recombination and repair	DEAD/DEAH box helicase	ATP-dependent DNA helicase Q-like 4A OS=Arabidopsis thaliana OX=3702 GN=RECQL4A PE=2 SV=1	--	--	DNA helicase, ATP-dependent, RecQ type [Artemisia annua]	molecular function: binding (GO:0005488);; biological process: metabolic process (GO:0008152);; biological process: cellular process (GO:0009987);; biological process: response to stimulus (GO:0050896);; molecular function: catalytic activity (GO:0003824);; biological process: cellular component organization or biogenesis (GO:0071840)
evm.TU.scaffold_1042.93	evm.TU.scaffold_1042.93	0	0	0.142783	7	0.116195	5	1.58854	62	1.09257	46	1.38993	51	9.98e-08	1.96323	up	[QV]	Secondary metabolites biosynthesis, transport and catabolism;; Defense mechanisms	Molecular Function: monooxygenase activity (GO:0004497);; Molecular Function: iron ion binding (GO:0005506);; Cellular Component: integral component of membrane (GO:0016021);; Molecular Function: oxidoreductase activity, acting on paired donors, with incorporation or reduction of molecular oxygen (GO:0016705);; Molecular Function: heme binding (GO:0020037);;	--	--	[Q]	Secondary metabolites biosynthesis, transport and catabolism	Cytochrome P450	Cytochrome P450 Tp9025 OS=Tanacetum parthenium OX=127999 PE=2 SV=1	--	--	cytochrome P450 [Tanacetum parthenium]	molecular function: catalytic activity (GO:0003824);; biological process: metabolic process (GO:0008152);; biological process: single-organism process (GO:0044699);; molecular function: binding (GO:0005488);; cellular component: membrane (GO:0016020);; cellular component: membrane part (GO:0044425)
evm.TU.scaffold_1430.423	evm.TU.scaffold_1430.423	0.462233	11	0.486656	14	0.230278	6	1.25781	28	1.7006	41	1.81734	37	0.0092314	1.13558	up	--	--	Molecular Function: molecular_function (GO:0003674);; Molecular Function: nucleic acid binding (GO:0003676);; Molecular Function: RNA binding (GO:0003723);; Molecular Function: catalytic activity (GO:0003824);; Molecular Function: nuclease activity (GO:0004518);; Molecular Function: endonuclease activity (GO:0004519);; Molecular Function: binding (GO:0005488);; Cellular Component: cellular_compon…	--	--	[R]	General function prediction only	PPR repeat family	Pentatricopeptide repeat-containing protein At1g22960, mitochondrial OS=Arabidopsis thaliana OX=3702 GN=At1g22960 PE=2 SV=1	--	--	pentatricopeptide repeat-containing protein, mitochondrial [Artemisia annua]	molecular function: binding (GO:0005488);; molecular function: catalytic activity (GO:0003824);; biological process: metabolic process (GO:0008152);; biological process: cellular process (GO:0009987);; cellular component: cell (GO:0005623);; cellular component: cell part (GO:0044464);; cellular component: organelle (GO:0043226)
evm.TU.scaffold_408.277	evm.TU.scaffold_408.277	36.6947	819	30.4219	786	28.431	584	17.3348	359	18.503	411	16.5855	319	2.2e-05	-0.815361	down	--	--	Cellular Component: integral component of membrane (GO:0016021);;	--	--	[U]	Intracellular trafficking, secretion, and vesicular transport	PRA1 family protein	PRA1 family protein F2 OS=Arabidopsis thaliana OX=3702 GN=PRA1F2 PE=1 SV=1	--	--	hypothetical protein CTI12_AA505070 [Artemisia annua]	cellular component: membrane (GO:0016020);; cellular component: membrane part (GO:0044425)
evm.TU.scaffold_asm16_new.2110	evm.TU.scaffold_asm16_new.2110	33.2899	321	31.6863	354	27.179	241	18.4708	165	18.5081	178	22.1397	184	0.0240067	-0.591199	down	--	--	--	--	--	--	--	--	--	--	--	hypothetical protein CTI12_AA460030 [Artemisia annua]	--
evm.TU.scaffold_1889.16	evm.TU.scaffold_1889.16	34.6559	1539	47.7196	2454	42.9459	1754	75.3611	3100	80.3482	3552	78.5458	2999	1.84e-08	0.85849	up	[O]	Posttranslational modification, protein turnover, chaperones	Molecular Function: ATP binding (GO:0005524);; Biological Process: protein refolding (GO:0042026);;	--	--	[O]	Posttranslational modification, protein turnover, chaperones	TCP-1/cpn60 chaperonin family	RuBisCO large subunit-binding protein subunit beta, chloroplastic OS=Pisum sativum OX=3888 PE=1 SV=2	--	--	chaperonin 60 beta [Artemisia annua]	molecular function: binding (GO:0005488);; biological process: cellular process (GO:0009987)
Chrysanthemum_x_morifolium_newGene_49948	--	8.79935	478	4.6818	295	5.76789	289	3.7046	187	3.68721	200	3.59689	169	0.0385198	-0.696829	down	[T]	Signal transduction mechanisms	Molecular Function: transmembrane receptor protein tyrosine kinase activity (GO:0004714);; Molecular Function: phosphoprotein phosphatase activity (GO:0004721);; Molecular Function: ATP binding (GO:0005524);; Biological Process: protein dephosphorylation (GO:0006470);; Cellular Component: integral component of membrane (GO:0016021);; Biological Process: peptidyl-tyrosine phosphorylation (GO:00181…	--	--	--	--	--	Probable LRR receptor-like serine/threonine-protein kinase At2g24230 OS=Arabidopsis thaliana OX=3702 GN=At2g24230 PE=2 SV=1	S	Function unknown	probable LRR receptor-like serine/threonine-protein kinase At2g24230 [Lactuca sativa]	molecular function: catalytic activity (GO:0003824);; molecular function: signal transducer activity (GO:0004871);; molecular function: molecular transducer activity (GO:0060089);; biological process: metabolic process (GO:0008152);; biological process: cellular process (GO:0009987);; biological process: signaling (GO:0023052);; biological process: single-organism process (GO:0044699);; biologica…
evm.TU.scaffold_956.417	evm.TU.scaffold_956.417	7.84493	43	8.68916	55	7.57435	38	1.79431	10	3.43071	19	1.39498	7	0.0116465	-1.09817	down	--	--	--	--	--	--	--	--	--	--	--	hypothetical protein CTI12_AA039730 [Artemisia annua]	--
evm.TU.scaffold_1690.79	evm.TU.scaffold_1690.79	47.7886	460	34.2025	381	23.9017	212	18.0672	161	12.643	121	13.8688	115	0.000901699	-1.04228	down	[S]	Function unknown	Cellular Component: integral component of membrane (GO:0016021);;	--	--	[R]	General function prediction only	Proteolipid membrane potential modulator	Hydrophobic protein LTI6A OS=Oryza sativa subsp. japonica OX=39947 GN=LTI6A PE=2 SV=1	--	--	putative proteolipid membrane potential modulator [Helianthus annuus]	cellular component: membrane (GO:0016020);; cellular component: membrane part (GO:0044425)
evm.TU.scaffold_254.467	evm.TU.scaffold_254.467	1.90577	62	2.63678	99	1.46326	44	1.0513	32	0.632711	21	0.518543	15	0.0277769	-0.963365	down	[C]	Energy production and conversion	Molecular Function: oxidoreductase activity (GO:0016491);; Molecular Function: FAD binding (GO:0071949);;	--	--	--	--	FAD binding domain	Berberine bridge enzyme-like 21 OS=Arabidopsis thaliana OX=3702 GN=At4g20840 PE=2 SV=1	--	--	hypothetical protein CTI12_AA101490 [Artemisia annua]	molecular function: catalytic activity (GO:0003824);; molecular function: binding (GO:0005488)
evm.TU.scaffold_1269.563	evm.TU.scaffold_1269.563	8.04363	288	11.4946	477	7.17432	237	16.3508	543	16.4978	588	14.0385	433	0.00486913	0.725841	up	[L]	Replication, recombination and repair	--	--	--	[LT]	Replication, recombination and repair;; Signal transduction mechanisms	DNA photolyase	Blue-light photoreceptor PHR2 OS=Arabidopsis thaliana OX=3702 GN=PHR2 PE=2 SV=2	--	--	blue-light photoreceptor PHR2-like [Cynara cardunculus var. scolymus]	--
evm.TU.scaffold_405.120	evm.TU.scaffold_405.120	10.1269	114	10.1843	133	9.23313	96	19.1416	200	14.9474	168	18.6993	181	0.00691638	0.738631	up	--	--	Molecular Function: nucleic acid binding (GO:0003676);; Molecular Function: RNA-DNA hybrid ribonuclease activity (GO:0004523);; Cellular Component: ribosome (GO:0005840);; Biological Process: metal ion transport (GO:0030001);; Molecular Function: metal ion binding (GO:0046872);;	--	--	--	--	--	--	--	--	ribosomal protein L9/RNase H1 [Artemisia annua]	molecular function: binding (GO:0005488);; molecular function: catalytic activity (GO:0003824);; biological process: metabolic process (GO:0008152);; biological process: cellular process (GO:0009987);; cellular component: cell (GO:0005623);; cellular component: macromolecular complex (GO:0032991);; cellular component: organelle (GO:0043226);; cellular component: cell part (GO:0044464);; biologica…
Chrysanthemum_x_morifolium_newGene_97989	--	7.50262	275	10.4209	386	8.4737	284	4.33811	140	3.55912	141	3.77299	133	2.8e-06	-0.959655	down	[F]	Nucleotide transport and metabolism	Molecular Function: nucleotide binding (GO:0000166);; Molecular Function: protein kinase activity (GO:0004672);; Cellular Component: membrane (GO:0016020);;	--	--	--	--	--	Putative leucine-rich repeat receptor-like protein kinase At2g19210 OS=Arabidopsis thaliana OX=3702 GN=At2g19210 PE=3 SV=1	--	--	probable LRR receptor-like serine/threonine-protein kinase At1g05700 [Helianthus annuus]	molecular function: binding (GO:0005488);; molecular function: catalytic activity (GO:0003824);; biological process: metabolic process (GO:0008152);; biological process: cellular process (GO:0009987);; cellular component: membrane (GO:0016020)
evm.TU.scaffold_1146.198	evm.TU.scaffold_1146.198	3.25767	216	3.39384	261	3.51659	215	5.89558	362	4.82453	319	5.65625	323	0.00318288	0.635221	up	[E]	Amino acid transport and metabolism	Molecular Function: metalloendopeptidase activity (GO:0004222);; Molecular Function: metal ion binding (GO:0046872);;	--	--	[O]	Posttranslational modification, protein turnover, chaperones	Peptidase family M3	Organellar oligopeptidase A, chloroplastic/mitochondrial OS=Arabidopsis thaliana OX=3702 GN=OOP PE=1 SV=1	--	--	zincin-like metalloprotease [Artemisia annua]	molecular function: catalytic activity (GO:0003824);; biological process: metabolic process (GO:0008152);; molecular function: binding (GO:0005488)
evm.TU.scaffold_1016.45	evm.TU.scaffold_1016.45	3.74759	128	2.64117	105	2.90151	92	1.10601	35	1.48428	51	0.480579	15	0.00438417	-1.11958	down	[QV]	Secondary metabolites biosynthesis, transport and catabolism;; Defense mechanisms	Molecular Function: monooxygenase activity (GO:0004497);; Molecular Function: iron ion binding (GO:0005506);; Cellular Component: integral component of membrane (GO:0016021);; Molecular Function: oxidoreductase activity, acting on paired donors, with incorporation or reduction of molecular oxygen (GO:0016705);; Molecular Function: heme binding (GO:0020037);;	--	--	[QI]	Secondary metabolites biosynthesis, transport and catabolism;; Lipid transport and metabolism	Cytochrome P450	Cytochrome P450 86A1 OS=Arabidopsis thaliana OX=3702 GN=CYP86A1 PE=1 SV=2	--	--	cytochrome P450 86A1 [Artemisia annua]	molecular function: catalytic activity (GO:0003824);; biological process: metabolic process (GO:0008152);; biological process: single-organism process (GO:0044699);; molecular function: binding (GO:0005488);; cellular component: membrane (GO:0016020);; cellular component: membrane part (GO:0044425)
evm.TU.scaffold_11933.68	evm.TU.scaffold_11933.68	432.237	7675	390.529	8031	328.239	5361	244.888	4029	235.472	4163	249.038	3803	0.000151159	-0.635268	down	[T]	Signal transduction mechanisms	Molecular Function: calcium ion binding (GO:0005509);; Biological Process: calcium-mediated signaling (GO:0019722);;	--	--	[T]	Signal transduction mechanisms	EF hand	Calmodulin-1/11/16 OS=Daucus carota OX=4039 GN=CAM-1 PE=2 SV=2	--	--	calmodulin-7-like [Camellia sinensis]	molecular function: binding (GO:0005488);; biological process: cellular process (GO:0009987);; biological process: signaling (GO:0023052);; biological process: single-organism process (GO:0044699);; biological process: response to stimulus (GO:0050896);; biological process: biological regulation (GO:0065007)
evm.TU.scaffold_10342.11	evm.TU.scaffold_10342.11	36.5129	379	37.7838	454	42.7236	408	18.7506	181	21.6365	224	14.934	134	5e-06	-0.983994	down	--	--	--	--	--	--	--	ABA/WDS induced protein	Abscisic stress-ripening protein 1 OS=Solanum lycopersicum OX=4081 GN=ASR1 PE=2 SV=1	--	--	abscisic stress-ripening protein 1 [Artemisia annua]	--
Chrysanthemum_x_morifolium_newGene_12852	--	7.53472	163	6.24704	156	8.59415	172	0.906538	19	5.05253	109	1.64564	30	0.0432809	-0.949645	down	--	--	--	--	--	--	--	--	--	--	--	--	--
evm.TU.scaffold_46.239	evm.TU.scaffold_46.239	19.8807	281	12.5608	206	20.9185	272	5.70425	75	7.84541	111	3.6668	45	5.65e-05	-1.28735	down	--	--	--	--	--	--	--	Protein of unknown function, DUF538	--	--	--	hypothetical protein CTI12_AA463270 [Artemisia annua]	--
evm.TU.scaffold_10636.44	evm.TU.scaffold_10636.44	4.48744	290	5.00739	375	4.49832	267	8.11319	485	7.61812	490	8.4388	469	2.16e-05	0.740096	up	[J]	Translation, ribosomal structure and biogenesis	Molecular Function: translation elongation factor activity (GO:0003746);; Cellular Component: mitochondrion (GO:0005739);;	--	--	[J]	Translation, ribosomal structure and biogenesis	Elongation factor TS	Polyprotein of EF-Ts, chloroplastic OS=Arabidopsis thaliana OX=3702 GN=PETs PE=1 SV=1	--	--	Nucleic acid-binding, OB-fold [Artemisia annua]	molecular function: binding (GO:0005488);; biological process: metabolic process (GO:0008152);; biological process: cellular process (GO:0009987);; cellular component: cell (GO:0005623);; cellular component: organelle (GO:0043226);; cellular component: cell part (GO:0044464)
evm.TU.scaffold_3294.112	evm.TU.scaffold_3294.112	8.26156	211	7.4056	219	7.31646	172	3.69788	88	3.35652	85	3.49572	77	3.53e-05	-1.00637	down	[QR]	Secondary metabolites biosynthesis, transport and catabolism;; General function prediction only	Molecular Function: oxidoreductase activity (GO:0016491);;	--	--	[R]	General function prediction only	N-terminal domain of oxidoreductase	2-alkenal reductase (NADP(+)-dependent) OS=Nicotiana tabacum OX=4097 GN=DBR PE=1 SV=1	--	--	2-alkenal reductase [Artemisia annua]	molecular function: catalytic activity (GO:0003824)
Chrysanthemum_x_morifolium_newGene_9889	--	0.077789	2	0.612713	9	0.976226	13	2.81888	37	2.22776	34	3.46604	38	0.00877593	1.16358	up	--	--	Molecular Function: microtubule motor activity (GO:0003777);; Molecular Function: ATP binding (GO:0005524);; Biological Process: microtubule-based movement (GO:0007018);; Molecular Function: microtubule binding (GO:0008017);;	K10395|1.08277e-73|mdm:103401988|K10395 kinesin family member 4/21/27 | (RefSeq) kinesin-like protein KIN-4C	--	[Z]	Cytoskeleton	--	Kinesin-like protein KIN-4C OS=Arabidopsis thaliana OX=3702 GN=KIN4C PE=2 SV=2	Z	Cytoskeleton	kinesin-like protein KIN-4C isoform X1 [Helianthus annuus]	molecular function: catalytic activity (GO:0003824);; molecular function: binding (GO:0005488);; biological process: cellular process (GO:0009987);; biological process: single-organism process (GO:0044699)
evm.TU.scaffold_11472.29	evm.TU.scaffold_11472.29	5.60548	77	4.13224	66	5.39568	69	1.3231	17	2.37741	33	1.31509	16	0.00514424	-1.10739	down	--	--	Biological Process: lipid transport (GO:0006869);; Molecular Function: lipid binding (GO:0008289);; Cellular Component: integral component of membrane (GO:0016021);;	--	--	--	--	Probable lipid transfer	Xylogen-like protein 11 OS=Arabidopsis thaliana OX=3702 GN=XYP11 PE=2 SV=2	--	--	Bifunctional inhibitor/plant lipid transfer protein/seed storage helical domain-containing protein [Artemisia annua]	biological process: single-organism process (GO:0044699);; biological process: localization (GO:0051179);; molecular function: binding (GO:0005488);; cellular component: membrane (GO:0016020);; cellular component: membrane part (GO:0044425)
evm.TU.scaffold_538.27	evm.TU.scaffold_538.27	0.48494	7	0.468675	8	0.253543	4	1.9154	25	3.89771	54	1.52041	19	0.00607711	1.20308	up	--	--	Molecular Function: protein phosphatase inhibitor activity (GO:0004864);; Biological Process: defense response (GO:0006952);; Biological Process: response to biotic stimulus (GO:0009607);; Biological Process: abscisic acid-activated signaling pathway (GO:0009738);; Molecular Function: abscisic acid binding (GO:0010427);; Molecular Function: signaling receptor activity (GO:0038023);;	--	--	--	--	Pathogenesis-related protein Bet v 1 family	Root allergen protein OS=Taraxacum officinale OX=50225 PE=1 SV=1	--	--	Bet v I domain-containing protein [Artemisia annua]	molecular function: molecular function regulator (GO:0098772);; biological process: biological regulation (GO:0065007);; biological process: response to stimulus (GO:0050896);; biological process: cellular process (GO:0009987);; biological process: signaling (GO:0023052);; biological process: single-organism process (GO:0044699);; molecular function: binding (GO:0005488);; molecular function: sig…
evm.TU.scaffold_1465.400	evm.TU.scaffold_1465.400	1.98153	129	1.79517	135	2.38437	142	3.05208	184	3.30806	214	3.64274	203	0.0276291	0.626447	up	--	--	Cellular Component: nucleus (GO:0005634);; Biological Process: intracellular protein transport (GO:0006886);; Molecular Function: Ran GTPase binding (GO:0008536);;	--	--	[YU]	Nuclear structure;; Intracellular trafficking, secretion, and vesicular transport	Importin-beta N-terminal domain	Importin beta-like SAD2 OS=Arabidopsis thaliana OX=3702 GN=SAD2 PE=1 SV=1	--	--	importin-beta domain, Armadillo-type fold protein [Artemisia annua]	cellular component: cell (GO:0005623);; cellular component: organelle (GO:0043226);; cellular component: cell part (GO:0044464);; biological process: localization (GO:0051179);; molecular function: binding (GO:0005488)
evm.TU.scaffold_1639.16	evm.TU.scaffold_1639.16	8.0716	204	10.3141	302	12.3266	286	14.1214	330	17.9181	450	19.0899	415	0.0155587	0.660322	up	[F]	Nucleotide transport and metabolism	Biological Process: deoxyribonucleotide biosynthetic process (GO:0009263);; Molecular Function: oxidoreductase activity (GO:0016491);; Molecular Function: metal ion binding (GO:0046872);;	--	--	[F]	Nucleotide transport and metabolism	Ribonucleotide reductase, small chain	Ribonucleoside-diphosphate reductase small chain OS=Nicotiana tabacum OX=4097 PE=2 SV=1	--	--	Ferritin/ribonucleotide reductase-like protein [Artemisia annua]	biological process: metabolic process (GO:0008152);; biological process: cellular process (GO:0009987);; biological process: single-organism process (GO:0044699);; molecular function: catalytic activity (GO:0003824);; molecular function: binding (GO:0005488)
evm.TU.scaffold_3531.18	evm.TU.scaffold_3531.18	1.28294	17	1.60629	25	0.891022	11	5.30137	65	4.15589	55	4.2905	49	0.000875037	1.26762	up	--	--	Biological Process: response to auxin (GO:0009733);;	--	--	--	--	Auxin responsive protein	Auxin-responsive protein SAUR76 OS=Arabidopsis thaliana OX=3702 GN=SAUR76 PE=1 SV=1	--	--	SAUR-like auxin-responsive protein family [Artemisia annua]	biological process: response to stimulus (GO:0050896)
evm.TU.scaffold_1806.781	evm.TU.scaffold_1806.781	11.5318	196	12.8916	254	11.9489	187	22.0687	348	19.1391	324	18.3684	269	0.0026851	0.656904	up	--	--	Molecular Function: intramolecular lyase activity (GO:0016872);;	--	--	--	--	Chalcone-flavanone isomerase	Fatty-acid-binding protein 3, chloroplastic OS=Arabidopsis thaliana OX=3702 GN=FAP3 PE=1 SV=1	--	--	chalcone isomerase [Artemisia annua]	molecular function: catalytic activity (GO:0003824)
evm.TU.scaffold_11005.26	evm.TU.scaffold_11005.26	12.9758	337	13.6372	410	13.0727	312	22.0185	529	21.0997	545	22.4698	501	2.61e-05	0.684814	up	[J]	Translation, ribosomal structure and biogenesis	Molecular Function: RNA binding (GO:0003723);;	--	--	[R]	General function prediction only	RNA recognition motif. (a.k.a. RRM, RBD, or RNP domain)	31 kDa ribonucleoprotein, chloroplastic OS=Nicotiana sylvestris OX=4096 PE=1 SV=1	--	--	Nucleotide-binding, alpha-beta plait [Artemisia annua]	molecular function: binding (GO:0005488)
evm.TU.scaffold_367.175	evm.TU.scaffold_367.175	6.58509	307	6.25611	338	5.8381	251	13.2573	573	8.87999	412	9.85204	395	0.00475852	0.699029	up	[P]	Inorganic ion transport and metabolism	Molecular Function: N,N-dimethylaniline monooxygenase activity (GO:0004499);; Molecular Function: structural molecule activity (GO:0005198);; Biological Process: intracellular protein transport (GO:0006886);; Biological Process: vesicle-mediated transport (GO:0016192);; Cellular Component: COPI vesicle coat (GO:0030126);; Molecular Function: flavin adenine dinucleotide binding (GO:0050660);; Mole…	--	--	--	--	Protein RETICULATA-related	Protein RETICULATA-RELATED 4, chloroplastic OS=Arabidopsis thaliana OX=3702 GN=RER4 PE=2 SV=1	--	--	unnamed protein product [Lactuca saligna]	molecular function: catalytic activity (GO:0003824);; biological process: metabolic process (GO:0008152);; biological process: single-organism process (GO:0044699);; molecular function: structural molecule activity (GO:0005198);; biological process: localization (GO:0051179);; cellular component: cell (GO:0005623);; cellular component: membrane (GO:0016020);; cellular component: macromolecular co…
Chrysanthemum_x_morifolium_newGene_37201	--	1.82218	40	12.1437	301	4.1392	82	0.888205	18	2.19636	48	1.06562	21	0.0215539	-1.06254	down	--	--	--	--	--	--	--	--	--	--	--	--	--
evm.TU.scaffold_8229.23	evm.TU.scaffold_8229.23	3.438	41	3.52259	48	3.55388	39	8.24322	90	9.52314	111	9.85274	99	0.000168011	1.13513	up	[O]	Posttranslational modification, protein turnover, chaperones	Biological Process: protein peptidyl-prolyl isomerization (GO:0000413);; Molecular Function: peptidyl-prolyl cis-trans isomerase activity (GO:0003755);; Cellular Component: cytoplasm (GO:0005737);; Biological Process: protein folding (GO:0006457);; Molecular Function: cyclosporin A binding (GO:0016018);;	--	--	[O]	Posttranslational modification, protein turnover, chaperones	Cyclophilin type peptidyl-prolyl cis-trans isomerase/CLD	Photosynthetic NDH subunit of lumenal location 5, chloroplastic OS=Arabidopsis thaliana OX=3702 GN=PNSL5 PE=1 SV=1	--	--	photosynthetic NDH subunit of lumenal location 5, chloroplastic [Helianthus annuus]	biological process: metabolic process (GO:0008152);; biological process: cellular process (GO:0009987);; molecular function: catalytic activity (GO:0003824);; cellular component: cell (GO:0005623);; cellular component: cell part (GO:0044464);; molecular function: binding (GO:0005488)
evm.TU.scaffold_1328.186	evm.TU.scaffold_1328.186	6.70005	136	10.126	238	7.83984	147	12.0076	226	14.9096	301	13.0401	228	0.0398684	0.614412	up	--	--	--	--	--	--	--	--	Probable protein ABIL5 OS=Oryza sativa subsp. japonica OX=39947 GN=Os01g0760900 PE=2 SV=1	--	--	ABI family [Artemisia annua]	--
evm.TU.scaffold_1187.331	evm.TU.scaffold_1187.331	2.46935	138	2.10039	136	1.64281	85	4.3444	225	3.41774	190	3.72274	179	0.0108787	0.761692	up	--	--	Cellular Component: integral component of membrane (GO:0016021);; Biological Process: transmembrane transport (GO:0055085);;	--	--	[T]	Signal transduction mechanisms	OPT oligopeptide transporter protein	Oligopeptide transporter 5 OS=Arabidopsis thaliana OX=3702 GN=OPT5 PE=2 SV=1	--	--	Oligopeptide transporter OPT superfamily [Artemisia annua]	cellular component: membrane (GO:0016020);; cellular component: membrane part (GO:0044425);; biological process: localization (GO:0051179)
evm.TU.scaffold_36.96	evm.TU.scaffold_36.96	6.22311	156	5.14802	149	6.38878	147	2.36192	55	1.93219	48	2.08213	45	4.63e-06	-1.25562	down	--	--	--	--	--	--	--	--	--	--	--	protein BYPASS-related protein [Artemisia annua]	--
evm.TU.scaffold_121.2	evm.TU.scaffold_121.2	4.02843	327	5.23382	492	4.98119	372	9.87299	742	8.18549	661	9.04861	632	1.37e-06	0.867958	up	[V]	Defense mechanisms	Molecular Function: ATP binding (GO:0005524);; Cellular Component: integral component of membrane (GO:0016021);; Molecular Function: ATPase activity (GO:0016887);;	--	--	[Q]	Secondary metabolites biosynthesis, transport and catabolism	ABC-2 type transporter	Pleiotropic drug resistance protein 1 OS=Nicotiana tabacum OX=4097 GN=PDR1 PE=2 SV=1	--	--	pleiotropic drug resistance protein 1 [Artemisia annua]	molecular function: binding (GO:0005488);; cellular component: membrane (GO:0016020);; cellular component: membrane part (GO:0044425);; molecular function: catalytic activity (GO:0003824)
Chrysanthemum_x_morifolium_newGene_60578	--	22.0414	202	12.9528	138	10.7706	91	6.74442	58	6.48305	59	5.63448	45	0.00829367	-0.985029	down	--	--	--	--	--	--	--	--	--	--	--	hypothetical protein LSAT_4X156481 [Lactuca sativa]	--
Chrysanthemum_x_morifolium_newGene_103680	--	4.4715	50	3.53654	46	9.71035	100	1.91157	20	1.15335	13	0.925685	9	0.00372184	-1.2299	down	--	--	--	--	--	--	--	--	--	--	--	--	--
evm.TU.scaffold_741.98	evm.TU.scaffold_741.98	20.1967	515	19.2788	569	14.8976	349	38.5244	910	38.9178	987	37.0669	812	1.54e-08	0.999725	up	[J]	Translation, ribosomal structure and biogenesis	Molecular Function: RNA binding (GO:0003723);;	--	--	[R]	General function prediction only	RNA recognition motif. (a.k.a. RRM, RBD, or RNP domain)	29 kDa ribonucleoprotein A, chloroplastic OS=Nicotiana sylvestris OX=4096 PE=2 SV=1	--	--	nucleotide-binding alpha-beta plait domain-containing protein [Artemisia annua]	molecular function: binding (GO:0005488)
Chrysanthemum_x_morifolium_newGene_26446	--	5.7648	97	12.1159	236	11.7901	183	5.36751	84	5.28408	89	4.30395	63	0.0485212	-0.777129	down	--	--	--	--	--	--	--	--	--	--	--	--	--
evm.TU.scaffold_1374.19	evm.TU.scaffold_1374.19	5.13744	95	4.5615	98	3.0266	52	1.78953	31	2.12142	39	2.09002	34	0.0499547	-0.820232	down	--	--	--	--	--	--	--	--	--	--	--	--	--
evm.TU.scaffold_11314.113	evm.TU.scaffold_11314.113	24.7865	532	26.7697	665	27.7585	548	8.08462	161	10.7323	230	12.9863	240	1.07e-08	-1.20068	down	--	--	Molecular Function: DNA binding (GO:0003677);; Molecular Function: transcription factor activity, sequence-specific DNA binding (GO:0003700);; Cellular Component: nucleus (GO:0005634);;	--	--	--	--	AP2 domain	Ethylene-responsive transcription factor WIN1 OS=Arabidopsis thaliana OX=3702 GN=WIN1 PE=2 SV=1	--	--	integrase-type DNA-binding superfamily protein [Artemisia annua]	molecular function: binding (GO:0005488);; molecular function: nucleic acid binding transcription factor activity (GO:0001071);; biological process: biological regulation (GO:0065007);; cellular component: cell (GO:0005623);; cellular component: organelle (GO:0043226);; cellular component: cell part (GO:0044464)
evm.TU.scaffold_8776.71	evm.TU.scaffold_8776.71	11.2136	344	12.8701	456	14.4489	407	7.13979	203	6.51156	199	6.8667	181	2.15e-05	-0.84642	down	[M]	Cell wall/membrane/envelope biogenesis	Molecular Function: transferase activity, transferring glycosyl groups (GO:0016757);;	--	--	--	--	Glycosyl transferase family 8	Probable galacturonosyltransferase-like 1 OS=Arabidopsis thaliana OX=3702 GN=GATL1 PE=2 SV=1	--	--	Glycosyl transferase, family 8 [Artemisia annua]	molecular function: catalytic activity (GO:0003824)
evm.TU.scaffold_161.24	evm.TU.scaffold_161.24	2.13377	62	1.34055	45	1.33578	36	0.119511	4	0	0	0.169108	5	1.12e-05	-1.70115	down	--	--	Molecular Function: RNA polymerase II regulatory region sequence-specific DNA binding (GO:0000977);; Molecular Function: transcription factor activity, sequence-specific DNA binding (GO:0003700);; Cellular Component: nucleus (GO:0005634);; Biological Process: positive regulation of transcription from RNA polymerase II promoter (GO:0045944);; Molecular Function: protein dimerization activity (GO:0…	--	--	[K]	Transcription	K-box region	Agamous-like MADS-box protein AGL8 homolog OS=Solanum tuberosum OX=4113 PE=2 SV=1	--	--	APETALA1 and FRUITFULL like protein [Chrysanthemum seticuspe f. boreale]	molecular function: binding (GO:0005488);; molecular function: nucleic acid binding transcription factor activity (GO:0001071);; biological process: biological regulation (GO:0065007);; cellular component: cell (GO:0005623);; cellular component: organelle (GO:0043226);; cellular component: cell part (GO:0044464)
Chrysanthemum_x_morifolium_newGene_24649	--	8.29359	99	10.5563	146	11.9613	132	3.82841	43	1.95891	24	1.62537	17	9.73e-06	-1.49611	down	--	--	--	--	--	--	--	--	--	S	Function unknown	uncharacterized protein LOC111913028 [Lactuca sativa]	--
evm.TU.scaffold_400.343	evm.TU.scaffold_400.343	2.31637	99	2.11221	105	2.63903	104	4.01632	159	3.46726	148	4.63239	171	0.0276767	0.678671	up	[C]	Energy production and conversion	Molecular Function: oxidoreductase activity, acting on the aldehyde or oxo group of donors, NAD or NADP as acceptor (GO:0016620);;	--	--	[C]	Energy production and conversion	Aldehyde dehydrogenase family	Aldehyde dehydrogenase family 7 member B4 OS=Arabidopsis thaliana OX=3702 GN=ALDH7B4 PE=2 SV=3	--	--	aldehyde dehydrogenase family 7 member B4 [Artemisia annua]	molecular function: catalytic activity (GO:0003824);; biological process: metabolic process (GO:0008152);; biological process: single-organism process (GO:0044699)
Chrysanthemum_x_morifolium_newGene_35575	--	9.30946	186	11.1791	259	8.68416	162	5.39046	101	6.75503	135	5.39271	94	0.030891	-0.648319	down	--	--	Biological Process: cellular process (GO:0009987);;	--	--	--	--	--	--	S	Function unknown	uncharacterized protein LOC110907395 [Helianthus annuus]	biological process: cellular process (GO:0009987)
evm.TU.scaffold_8920.113	evm.TU.scaffold_8920.113	12.441	195	7.84863	142	11.1351	160	1.18057	18	4.764	74	4.14796	56	0.00671414	-1.10971	down	--	--	Molecular Function: electron carrier activity (GO:0009055);; Cellular Component: chloroplast (GO:0009507);; Cellular Component: integral component of membrane (GO:0016021);;	--	--	--	--	Plastocyanin-like domain	Uclacyanin 1 OS=Arabidopsis thaliana OX=3702 GN=UCC1 PE=1 SV=1	--	--	cupredoxin superfamily protein [Artemisia annua]	molecular function: electron carrier activity (GO:0009055);; cellular component: cell (GO:0005623);; cellular component: organelle (GO:0043226);; cellular component: cell part (GO:0044464);; cellular component: membrane (GO:0016020);; cellular component: membrane part (GO:0044425)
evm.TU.scaffold_4052.2	evm.TU.scaffold_4052.2	0	0	0.044034	2	0.23441	7	0.76786	21	1.42737	41	1.81996	45	0.00124499	1.33374	up	[IR]	Lipid transport and metabolism;; General function prediction only	Molecular Function: hydrolase activity, acting on ester bonds (GO:0016788);;	--	--	--	--	GDSL-like Lipase/Acylhydrolase	GDSL esterase/lipase At1g71691 OS=Arabidopsis thaliana OX=3702 GN=At1g71691 PE=2 SV=1	--	--	GDSL-like Lipase/Acylhydrolase superfamily protein [Artemisia annua]	molecular function: catalytic activity (GO:0003824)
evm.TU.scaffold_1300.30	evm.TU.scaffold_1300.30	25.263	671	23.7885	732	22.7103	555	35.2468	868	41.7804	1105	34.7239	794	0.000694256	0.602955	up	--	--	Biological Process: response to acid chemical (GO:0001101);; Biological Process: regulation of protein phosphorylation (GO:0001932);; Biological Process: positive regulation of protein phosphorylation (GO:0001934);; Molecular Function: molecular_function (GO:0003674);; Molecular Function: structural constituent of ribosome (GO:0003735);; Molecular Function: MAP-kinase scaffold activity (GO:000507…	--	--	[T]	Signal transduction mechanisms	WD domain, G-beta repeat	Guanine nucleotide-binding protein subunit beta-like protein OS=Medicago sativa OX=3879 GN=GB1 PE=2 SV=1	--	--	G-protein beta WD-40 repeat-containing protein [Artemisia annua]	biological process: response to stimulus (GO:0050896);; biological process: biological regulation (GO:0065007);; molecular function: structural molecule activity (GO:0005198);; molecular function: binding (GO:0005488);; cellular component: cell (GO:0005623);; cellular component: cell part (GO:0044464);; cellular component: organelle (GO:0043226);; cellular component: organelle part (GO:0044422);;…
evm.TU.scaffold_40.56	evm.TU.scaffold_40.56	10.3961	272	12.3592	374	10.7022	258	7.63354	185	6.73215	176	7.07762	160	0.0123999	-0.595835	down	--	--	--	--	--	--	--	--	--	--	--	hypothetical protein CTI12_AA083530 [Artemisia annua]	--
evm.TU.scaffold_3959.144	evm.TU.scaffold_3959.144	0.472538	17	1.65994	66	1.41907	45	7.02889	224	5.99517	205	6.02803	178	9.21e-09	1.80732	up	[Q]	Secondary metabolites biosynthesis, transport and catabolism	Biological Process: fatty acid biosynthetic process (GO:0006633);; Cellular Component: integral component of membrane (GO:0016021);; Molecular Function: transferase activity, transferring acyl groups other than amino-acyl groups (GO:0016747);;	--	--	--	--	FAE1/Type III polyketide synthase-like protein	3-ketoacyl-CoA synthase 5 OS=Arabidopsis thaliana OX=3702 GN=KCS5 PE=2 SV=1	--	--	very-long-chain 3-ketoacyl-CoA synthase, Thiolase-like protein [Artemisia annua]	biological process: metabolic process (GO:0008152);; biological process: cellular process (GO:0009987);; biological process: single-organism process (GO:0044699);; cellular component: membrane (GO:0016020);; cellular component: membrane part (GO:0044425);; molecular function: catalytic activity (GO:0003824)
evm.TU.scaffold_1021.223	evm.TU.scaffold_1021.223	9.49641	298	8.73834	317	8.62791	249	19.3132	560	11.4924	359	14.8557	400	0.0147903	0.677039	up	[R]	General function prediction only	Cellular Component: cellular_component (GO:0005575);; Cellular Component: intracellular (GO:0005622);; Cellular Component: cell (GO:0005623);; Cellular Component: cytoplasm (GO:0005737);; Biological Process: organelle organization (GO:0006996);; Biological Process: biological_process (GO:0008150);; Cellular Component: chloroplast (GO:0009507);; Cellular Component: plastid envelope (GO:0009526);; …	--	--	[R]	General function prediction only	Photosynthesis system II assembly factor YCF48	Photosystem II stability/assembly factor HCF136, chloroplastic OS=Oryza sativa subsp. japonica OX=39947 GN=HCF136 PE=3 SV=1	--	--	ycf48-like protein [Artemisia annua]	cellular component: cell (GO:0005623);; cellular component: cell part (GO:0044464);; biological process: cellular process (GO:0009987);; biological process: cellular component organization or biogenesis (GO:0071840);; cellular component: organelle (GO:0043226);; cellular component: organelle part (GO:0044422);; cellular component: membrane (GO:0016020);; biological process: response to stimulus (…
evm.TU.scaffold_1889.1	evm.TU.scaffold_1889.1	5.29995	316	3.25293	225	3.04084	167	2.29253	127	1.30173	78	2.13633	110	0.0291011	-0.81962	down	--	--	Cellular Component: integral component of membrane (GO:0016021);;	--	--	--	--	--	--	--	--	hypothetical protein CTI12_AA619560 [Artemisia annua]	cellular component: membrane (GO:0016020);; cellular component: membrane part (GO:0044425)
Chrysanthemum_x_morifolium_newGene_50285	--	2.15169	17	2.51509	23	2.67671	20	11.8707	87	3.67213	29	11.9155	81	0.0092582	1.13058	up	--	--	--	--	--	--	--	--	--	--	--	phosphopantothenoylcysteine decarboxylase subunit VHS3-like [Helianthus annuus]	--
evm.TU.scaffold_1047.217	evm.TU.scaffold_1047.217	2.88321	256	3.22819	332	3.79846	310	5.86147	481	6.4951	573	5.9144	451	1.03e-05	0.823886	up	[V]	Defense mechanisms	Molecular Function: ATP binding (GO:0005524);; Cellular Component: integral component of membrane (GO:0016021);; Molecular Function: ATPase activity (GO:0016887);;	--	--	[Q]	Secondary metabolites biosynthesis, transport and catabolism	ABC-2 type transporter	Pleiotropic drug resistance protein 1 OS=Nicotiana tabacum OX=4097 GN=PDR1 PE=2 SV=1	--	--	PDR2 [Artemisia annua]	molecular function: binding (GO:0005488);; cellular component: membrane (GO:0016020);; cellular component: membrane part (GO:0044425);; molecular function: catalytic activity (GO:0003824)
evm.TU.scaffold_1051.26	evm.TU.scaffold_1051.26	2.654	45	1.56669	31	1.39195	22	7.6501	120	2.76205	47	4.69697	69	0.0492318	0.914296	up	--	--	Cellular Component: integral component of membrane (GO:0016021);;	--	--	--	--	--	Plastidal glycolate/glycerate translocator 1, chloroplastic OS=Arabidopsis thaliana OX=3702 GN=PLGG1 PE=1 SV=1	--	--	membrane protein [Artemisia annua]	cellular component: membrane (GO:0016020);; cellular component: membrane part (GO:0044425)
evm.TU.scaffold_1506.361	evm.TU.scaffold_1506.361	26.0132	650	27.2455	788	41.9005	962	19.86	460	17.7761	442	14.8306	319	0.00317354	-0.769837	down	[M]	Cell wall/membrane/envelope biogenesis	Molecular Function: catalytic activity (GO:0003824);;	--	--	[V]	Defense mechanisms	NAD dependent epimerase/dehydratase family	Vestitone reductase OS=Medicago sativa OX=3879 PE=1 SV=1	--	--	vestitone reductase [Artemisia annua]	molecular function: catalytic activity (GO:0003824)
Chrysanthemum_x_morifolium_newGene_82454	--	12.7031	219	18.5487	370	22.7444	365	10.5718	166	10.7944	185	8.64034	135	0.0167458	-0.732123	down	--	--	Biological Process: transcription, DNA-templated (GO:0006351);;	--	--	--	--	--	NAC domain-containing protein 83 OS=Arabidopsis thaliana OX=3702 GN=NAC083 PE=1 SV=1	K	Transcription	NAC domain-containing protein 83-like [Lactuca sativa]	biological process: metabolic process (GO:0008152);; biological process: cellular process (GO:0009987)
Chrysanthemum_x_morifolium_newGene_29147	--	0.785151	15	1.623	35	1.81922	29	5.1939	90	4.1455	71	4.92257	79	0.000385412	1.28168	up	[R]	General function prediction only	--	--	--	--	--	--	Pathogen-related protein OS=Hordeum vulgare OX=4513 PE=2 SV=2	S	Function unknown	pathogen-related protein-like [Helianthus annuus]	--
Chrysanthemum_x_morifolium_newGene_70377	--	3.4305	50	5.50194	93	3.6282	49	1.74811	24	0.912629	14	1.6659	21	0.0145846	-1.03231	down	--	--	--	--	--	--	--	--	--	--	--	--	--
evm.TU.scaffold_10012.31	evm.TU.scaffold_10012.31	322.447	4173	352.158	5278	321.902	3832	205.603	2465	196.934	2538	183.118	2038	1.56e-10	-0.750699	down	--	--	--	--	--	--	--	Gibberellin regulated protein	Snakin-2 OS=Solanum tuberosum OX=4113 GN=SN2 PE=1 SV=1	--	--	GAST1-like protein [Artemisia annua]	--
evm.TU.scaffold_1438.1061	evm.TU.scaffold_1438.1061	1.09364	20	1.70507	37	1.69493	29	4.72477	80	2.69088	49	3.60925	57	0.0363305	0.9026	up	--	--	--	--	--	--	--	--	--	--	--	unnamed protein product [Lactuca saligna]	--
Chrysanthemum_x_morifolium_newGene_57615	--	8.00702	204	10.7166	309	8.65775	200	6.11172	143	4.83827	119	5.57855	119	0.0180189	-0.667428	down	--	--	--	--	--	--	--	--	--	--	--	--	--
Chrysanthemum_x_morifolium_newGene_78765	--	7.39409	249	6.86743	314	8.0329	312	3.48297	156	3.48983	152	3.05523	115	0.000750275	-0.828794	down	--	--	Molecular Function: actin binding (GO:0003779);; Biological Process: cytoskeleton organization (GO:0007010);;	--	--	--	--	--	--	--	--	Gelsolin domain-containing protein [Cynara cardunculus var. scolymus]	molecular function: binding (GO:0005488);; biological process: cellular process (GO:0009987);; biological process: cellular component organization or biogenesis (GO:0071840)
evm.TU.scaffold_63.127	evm.TU.scaffold_63.127	7.89356	235	5.95245	205	7.14488	196	14.0847	388	9.71637	288	12.3783	317	0.0109745	0.696805	up	[P]	Inorganic ion transport and metabolism	Molecular Function: catalase activity (GO:0004096);; Biological Process: response to oxidative stress (GO:0006979);; Molecular Function: heme binding (GO:0020037);; Biological Process: hydrogen peroxide catabolic process (GO:0042744);; Molecular Function: metal ion binding (GO:0046872);;	--	--	[P]	Inorganic ion transport and metabolism	Catalase	Catalase OS=Helianthus annuus OX=4232 PE=2 SV=1	--	--	Catalase active site-containing protein [Artemisia annua]	molecular function: catalytic activity (GO:0003824);; molecular function: antioxidant activity (GO:0016209);; biological process: metabolic process (GO:0008152);; biological process: cellular process (GO:0009987);; biological process: single-organism process (GO:0044699);; biological process: response to stimulus (GO:0050896);; biological process: detoxification (GO:0098754);; molecular function:…
Chrysanthemum_x_morifolium_newGene_39870	--	5.03057	96	4.89728	112	4.76481	102	2.81144	50	3.25296	56	3.7815	52	0.048222	-0.702185	down	--	--	Molecular Function: voltage-gated potassium channel activity (GO:0005249);; Cellular Component: cytoplasm (GO:0005737);; Biological Process: potassium ion transmembrane transport (GO:0071805);;	--	--	[C]	Energy production and conversion	--	Probable voltage-gated potassium channel subunit beta OS=Arabidopsis thaliana OX=3702 GN=KAB1 PE=1 SV=1	C	Energy production and conversion	hypothetical protein Ccrd_013387 [Cynara cardunculus var. scolymus]	molecular function: transporter activity (GO:0005215);; biological process: cellular process (GO:0009987);; biological process: single-organism process (GO:0044699);; biological process: localization (GO:0051179);; biological process: biological regulation (GO:0065007);; cellular component: cell (GO:0005623);; cellular component: cell part (GO:0044464)
Chrysanthemum_x_morifolium_newGene_88982	--	0	0	0	0	0	0	5.65863	23	5.67717	25	7.45495	29	2.45e-06	1.77253	up	--	--	--	--	--	--	--	--	--	S	Function unknown	uncharacterized protein LOC111878394 isoform X2 [Lactuca sativa]	--
Chrysanthemum_x_morifolium_newGene_78890	--	2.52285	90	1.52124	63	2.54323	84	0.861349	29	0.772575	28	1.06461	31	0.0152155	-0.966511	down	--	--	--	--	--	--	--	--	--	--	--	hypothetical protein LSAT_1X94380 [Lactuca sativa]	--
evm.TU.scaffold_4404.378	evm.TU.scaffold_4404.378	145.02	4682	129.803	4853	92.5061	2747	72.4214	2166	58.2581	1873	63.0067	1749	7.1e-05	-0.857367	down	[IR]	Lipid transport and metabolism;; General function prediction only	Cellular Component: integral component of membrane (GO:0016021);; Molecular Function: hydrolase activity, acting on ester bonds (GO:0016788);;	--	--	--	--	GDSL-like Lipase/Acylhydrolase	GDSL esterase/lipase At5g45950 OS=Arabidopsis thaliana OX=3702 GN=At5g45950 PE=2 SV=1	--	--	putative triacylglycerol lipase [Helianthus annuus]	cellular component: membrane (GO:0016020);; cellular component: membrane part (GO:0044425);; molecular function: catalytic activity (GO:0003824)
evm.TU.scaffold_1693.446	evm.TU.scaffold_1693.446	9.06124	191	9.93705	242	9.50065	184	18.8687	367	12.9627	271	14.1134	255	0.0246779	0.614453	up	[T]	Signal transduction mechanisms	Molecular Function: protein tyrosine/serine/threonine phosphatase activity (GO:0008138);;	--	--	[V]	Defense mechanisms	Dual specificity phosphatase, catalytic domain	Phosphoglucan phosphatase LSF2, chloroplastic OS=Arabidopsis thaliana OX=3702 GN=LSF2 PE=1 SV=1	--	--	phosphoglucan phosphatase LSF2, chloroplastic [Artemisia annua]	molecular function: catalytic activity (GO:0003824);; biological process: metabolic process (GO:0008152);; biological process: cellular process (GO:0009987)
evm.TU.scaffold_270.103	evm.TU.scaffold_270.103	1.24564	63	0.850452	50	1.03608	48	0.133424	7	0.488896	25	0.291129	13	0.0208367	-1.04129	down	--	--	Cellular Component: integral component of membrane (GO:0016021);;	--	--	[R]	General function prediction only	Domain of unknown function	Protein ACCELERATED CELL DEATH 6 OS=Arabidopsis thaliana OX=3702 GN=ACD6 PE=1 SV=1	--	--	ankyrin repeat-containing domain, PGG domain protein [Artemisia annua]	cellular component: membrane (GO:0016020);; cellular component: membrane part (GO:0044425)
evm.TU.scaffold_5723.116	evm.TU.scaffold_5723.116	1.51038	39	0.821782	25	1.24299	30	0.185952	5	0.169662	5	0.487979	11	0.0358846	-1.00016	down	--	--	Molecular Function: protein binding (GO:0005515);;	--	--	--	--	FBD	Putative F-box/FBD/LRR-repeat protein At4g13965 OS=Arabidopsis thaliana OX=3702 GN=At4g13965 PE=4 SV=2	--	--	FBD-like protein [Artemisia annua]	molecular function: binding (GO:0005488)
evm.TU.scaffold_427.110	evm.TU.scaffold_427.110	4.65137	104	6.02998	155	3.65139	75	9.58783	197	7.17544	159	8.54216	163	0.0468685	0.68493	up	[J]	Translation, ribosomal structure and biogenesis	Molecular Function: metal ion binding (GO:0046872);; Molecular Function: metalloaminopeptidase activity (GO:0070006);; Biological Process: protein initiator methionine removal (GO:0070084);;	--	--	[O]	Posttranslational modification, protein turnover, chaperones	Metallopeptidase family M24	Methionine aminopeptidase 1B, chloroplastic OS=Arabidopsis thaliana OX=3702 GN=MAP1B PE=2 SV=2	--	--	Peptidase M24A, methionine aminopeptidase, subfamily 1 [Artemisia annua]	molecular function: binding (GO:0005488);; molecular function: catalytic activity (GO:0003824);; biological process: metabolic process (GO:0008152);; biological process: cellular process (GO:0009987)
evm.TU.scaffold_1699.240	evm.TU.scaffold_1699.240	0.661373	47	0.641583	53	0.723621	47	1.16144	76	1.30578	92	1.37899	84	0.0380919	0.754962	up	[K]	Transcription	--	--	--	--	--	NLI interacting factor-like phosphatase	--	--	--	FCP1-like domain, HAD-like domain protein [Artemisia annua]	--
Chrysanthemum_x_morifolium_newGene_72549	--	29.0407	255	28.2411	287	23.4395	189	9.61677	79	12.0352	106	10.1551	77	6.77e-07	-1.18571	down	--	--	--	--	--	--	--	--	Gibberellin-regulated protein 10 OS=Arabidopsis thaliana OX=3702 GN=GASA10 PE=2 SV=1	S	Function unknown	peamaclein-like [Helianthus annuus]	--
Chrysanthemum_x_morifolium_newGene_10653	--	5.97721	209	5.02222	208	9.88043	334	16.6752	545	14.4705	520	12.6793	412	0.0016891	0.926678	up	[E]	Amino acid transport and metabolism	Molecular Function: aminopeptidase activity (GO:0004177);; Cellular Component: cytoplasm (GO:0005737);; Biological Process: proteolysis (GO:0006508);; Molecular Function: metalloexopeptidase activity (GO:0008235);; Molecular Function: manganese ion binding (GO:0030145);;	K01255|0|sind:105162933|K01255 leucyl aminopeptidase [EC:3.4.11.1] | (RefSeq) leucine aminopeptidase 2, chloroplastic-like	Glutathione metabolism (ko00480)	[R]	General function prediction only	Cytosol aminopeptidase family, catalytic domain;; Cytosol aminopeptidase family, N-terminal domain	Leucine aminopeptidase 2, chloroplastic OS=Arabidopsis thaliana OX=3702 GN=LAP2 PE=2 SV=2	E	Amino acid transport and metabolism	leucine aminopeptidase 1-like [Lactuca sativa]	molecular function: catalytic activity (GO:0003824);; biological process: metabolic process (GO:0008152);; cellular component: cell (GO:0005623);; cellular component: cell part (GO:0044464);; molecular function: binding (GO:0005488)
evm.TU.scaffold_295.83	evm.TU.scaffold_295.83	2.2918	34	3.24522	56	4.46291	61	8.86826	121	9.08159	133	13.159	167	6.77e-05	1.2826	up	--	--	--	--	--	--	--	Probable lipid transfer	--	--	--	bifunctional inhibitor/lipid-transfer protein/seed storage 2S albumin superfamily protein [Artemisia annua]	--
evm.TU.scaffold_1730.88	evm.TU.scaffold_1730.88	50.8741	318	39.4555	285	31.205	179	20.9581	122	11.5261	72	18.4901	100	0.00142536	-1.02942	down	--	--	Molecular Function: growth factor activity (GO:0008083);;	--	--	--	--	--	--	--	--	hypothetical protein CTI12_AA122170 [Artemisia annua]	molecular function: binding (GO:0005488)
evm.TU.scaffold_821.11	evm.TU.scaffold_821.11	3.35943	149	2.29819	118	2.47614	101	4.74994	196	4.89248	216	4.79956	183	0.0135015	0.724839	up	--	--	Molecular Function: DNA binding (GO:0003677);; Cellular Component: nucleus (GO:0005634);; Biological Process: regulation of transcription, DNA-templated (GO:0006355);;	--	--	[K]	Transcription	KNOX2 domain	Homeobox protein knotted-1-like 3 OS=Malus domestica OX=3750 PE=2 SV=1	--	--	TALE protein [Artemisia annua]	molecular function: binding (GO:0005488);; cellular component: cell (GO:0005623);; cellular component: organelle (GO:0043226);; cellular component: cell part (GO:0044464);; biological process: biological regulation (GO:0065007)
evm.TU.scaffold_1492.98	evm.TU.scaffold_1492.98	24.9759	244	27.0615	306	26.226	236	17.5686	159	16.5456	161	16.2591	137	0.0124437	-0.591896	down	--	--	--	--	--	--	--	--	--	--	--	--	--
evm.TU.scaffold_1185.50	evm.TU.scaffold_1185.50	8.57592	312	7.77527	327	9.69374	324	13.6541	460	15.1882	550	12.2739	384	0.00482684	0.613333	up	[DZ]	Cell cycle control, cell division, chromosome partitioning;; Cytoskeleton	Biological Process: ribosome biogenesis (GO:0042254);; Cellular Component: ribonucleoprotein complex (GO:1990904);;	--	--	[S]	Function unknown	Regulator of chromosome condensation (RCC1) repeat	Ultraviolet-B receptor UVR8 OS=Arabidopsis thaliana OX=3702 GN=UVR8 PE=1 SV=1	--	--	regulator of chromosome condensation (RCC1) family protein [Artemisia annua]	biological process: cellular component organization or biogenesis (GO:0071840);; cellular component: macromolecular complex (GO:0032991)
evm.TU.scaffold_693.94	evm.TU.scaffold_693.94	956.289	11412	849.476	11740	586.859	6441	412.793	4564	439.33	5219	316.656	3250	4.04e-05	-0.944355	down	--	--	Molecular Function: cysteine-type endopeptidase inhibitor activity (GO:0004869);;	--	--	--	--	Aspartic acid proteinase inhibitor	--	--	--	proteinase inhibitor I25 [Artemisia annua]	molecular function: molecular function regulator (GO:0098772);; biological process: biological regulation (GO:0065007)
evm.TU.scaffold_850.18	evm.TU.scaffold_850.18	0.387317	14	0.634651	27	0.464139	16	1.21523	40	1.50867	54	1.27984	40	0.0330266	0.940846	up	[QV]	Secondary metabolites biosynthesis, transport and catabolism;; Defense mechanisms	Molecular Function: monooxygenase activity (GO:0004497);; Molecular Function: iron ion binding (GO:0005506);; Molecular Function: oxidoreductase activity, acting on paired donors, with incorporation or reduction of molecular oxygen (GO:0016705);; Molecular Function: heme binding (GO:0020037);;	--	--	[Q]	Secondary metabolites biosynthesis, transport and catabolism	Cytochrome P450	Labd-13Z-ene-9,15,16-triol synthase, chloroplastic OS=Vitex agnus-castus OX=54477 GN=CYP76BK1 PE=1 SV=1	--	--	cytochrome P450 [Artemisia annua]	molecular function: catalytic activity (GO:0003824);; biological process: metabolic process (GO:0008152);; biological process: single-organism process (GO:0044699);; molecular function: binding (GO:0005488)
evm.TU.scaffold_1455.99	evm.TU.scaffold_1455.99	2.64521	32	2.62777	36	2.44223	27	9.65758	106	6.98834	83	9.18235	94	1.14e-05	1.36801	up	[J]	Translation, ribosomal structure and biogenesis	Molecular Function: translation elongation factor activity (GO:0003746);; Molecular Function: GTPase activity (GO:0003924);; Molecular Function: GTP binding (GO:0005525);;	--	--	[J]	Translation, ribosomal structure and biogenesis	Elongation factor Tu GTP binding domain	Elongation factor Tu, chloroplastic OS=Arabidopsis thaliana OX=3702 GN=TUFA PE=1 SV=1	--	--	elongation factor Tu, partial [Chrysanthemum boreale]	molecular function: binding (GO:0005488);; biological process: metabolic process (GO:0008152);; biological process: cellular process (GO:0009987);; molecular function: catalytic activity (GO:0003824)
evm.TU.scaffold_1659.275	evm.TU.scaffold_1659.275	1.18181	28	1.85263	51	1.1586	26	2.82247	62	2.97243	70	3.38807	69	0.0431081	0.835805	up	--	--	--	--	--	--	--	--	--	--	--	unnamed protein product [Lactuca saligna]	--
Chrysanthemum_x_morifolium_newGene_11360	--	5.26779	154	2.07286	97	5.98052	152	1.97811	63	2.67441	64	1.3262	42	0.0207411	-0.893311	down	--	--	--	--	--	--	--	--	--	T	Signal transduction mechanisms	phosphate transporter PHO1 homolog 9-like [Helianthus annuus]	--
Chrysanthemum_x_morifolium_newGene_96736	--	4.96289	106	1.21016	35	4.78984	98	0.860442	20	1.13892	27	1.1647	25	0.033183	-0.98699	down	--	--	--	--	--	--	--	--	--	--	--	--	--
evm.TU.scaffold_3326.12	evm.TU.scaffold_3326.12	26.2856	168	27.2133	201	21.5152	126	50.6377	299	36.7226	233	40.9718	224	0.01443	0.682203	up	--	--	Cellular Component: intracellular membrane-bounded organelle (GO:0043231);; Molecular Function: 2 iron, 2 sulfur cluster binding (GO:0051537);;	--	--	[R]	General function prediction only	Iron-binding zinc finger CDGSH type	CDGSH iron-sulfur domain-containing protein NEET OS=Arabidopsis thaliana OX=3702 GN=NEET PE=1 SV=1	--	--	2 iron, 2 sulfur cluster binding protein [Artemisia annua]	cellular component: cell (GO:0005623);; cellular component: organelle (GO:0043226);; cellular component: cell part (GO:0044464);; molecular function: binding (GO:0005488)
evm.TU.scaffold_896.47	evm.TU.scaffold_896.47	4.92132	112	7.02122	185	4.31593	90	12.2829	258	10.9395	247	11.3852	222	0.00047308	0.942744	up	[J]	Translation, ribosomal structure and biogenesis	Molecular Function: structural constituent of ribosome (GO:0003735);; Cellular Component: ribosome (GO:0005840);; Biological Process: translation (GO:0006412);;	--	--	[J]	Translation, ribosomal structure and biogenesis	Ribosomal protein L11, N-terminal domain	50S ribosomal protein L11, chloroplastic OS=Arabidopsis thaliana OX=3702 GN=RPL11 PE=2 SV=1	--	--	plastid ribosomal protein l11 [Artemisia annua]	molecular function: structural molecule activity (GO:0005198);; cellular component: cell (GO:0005623);; cellular component: macromolecular complex (GO:0032991);; cellular component: organelle (GO:0043226);; cellular component: cell part (GO:0044464);; biological process: metabolic process (GO:0008152);; biological process: cellular process (GO:0009987)
evm.TU.scaffold_1606.23	evm.TU.scaffold_1606.23	6.93639	133	6.68866	148	3.20068	57	11.1781	198	10.5332	200	12.2908	202	0.0270877	0.808008	up	[O]	Posttranslational modification, protein turnover, chaperones	Molecular Function: adenyl-nucleotide exchange factor activity (GO:0000774);; Cellular Component: mitochondrial matrix (GO:0005759);; Biological Process: protein folding (GO:0006457);; Molecular Function: protein homodimerization activity (GO:0042803);; Molecular Function: chaperone binding (GO:0051087);;	--	--	[O]	Posttranslational modification, protein turnover, chaperones	GrpE	--	--	--	grpE nucleotide exchange factor [Artemisia annua]	molecular function: binding (GO:0005488);; molecular function: molecular function regulator (GO:0098772);; biological process: biological regulation (GO:0065007);; cellular component: cell (GO:0005623);; cellular component: membrane-enclosed lumen (GO:0031974);; cellular component: organelle (GO:0043226);; cellular component: organelle part (GO:0044422);; cellular component: cell part (GO:0044464…
evm.TU.scaffold_468.399	evm.TU.scaffold_468.399	5.63165	153	5.63069	177	3.46836	87	1.87275	48	2.60796	71	2.32523	55	0.0128568	-0.889856	down	--	--	Molecular Function: nucleotide binding (GO:0000166);; Molecular Function: molecular_function (GO:0003674);; Molecular Function: binding (GO:0005488);; Molecular Function: protein binding (GO:0005515);; Cellular Component: cellular_component (GO:0005575);; Cellular Component: intracellular (GO:0005622);; Cellular Component: cell (GO:0005623);; Cellular Component: cytoplasm (GO:0005737);; Cellular …	--	--	[R]	General function prediction only	Leucine rich repeat	DNA damage-repair/toleration protein DRT100 OS=Arabidopsis thaliana OX=3702 GN=DRT100 PE=2 SV=2	--	--	leucine-rich repeat protein [Artemisia annua]	molecular function: binding (GO:0005488);; cellular component: cell (GO:0005623);; cellular component: cell part (GO:0044464);; cellular component: organelle (GO:0043226)
Chrysanthemum_x_morifolium_newGene_81049	--	23.1586	405	22.0649	453	23.9017	410	14.1075	214	8.16042	140	4.91079	61	0.000731581	-1.15984	down	[IR]	Lipid transport and metabolism;; General function prediction only	Cellular Component: membrane (GO:0016020);; Molecular Function: serine O-acyltransferase activity (GO:0016412);;	--	--	--	--	GDSL-like Lipase/Acylhydrolase	GDSL esterase/lipase 3 OS=Arabidopsis thaliana OX=3702 GN=GLIP3 PE=2 SV=2	S	Function unknown	GDSL esterase/lipase 1-like isoform X1 [Lactuca sativa]	cellular component: membrane (GO:0016020);; molecular function: catalytic activity (GO:0003824)
evm.TU.scaffold_489.18	evm.TU.scaffold_489.18	9.99327	119	10.0228	138	9.75628	107	17.977	198	19.2046	227	14.5251	149	0.00944817	0.707757	up	[O]	Posttranslational modification, protein turnover, chaperones	Molecular Function: thioredoxin-disulfide reductase activity (GO:0004791);; Cellular Component: cytoplasm (GO:0005737);; Biological Process: removal of superoxide radicals (GO:0019430);;	--	--	[O]	Posttranslational modification, protein turnover, chaperones	Pyridine nucleotide-disulphide oxidoreductase	Thioredoxin reductase 1, mitochondrial OS=Arabidopsis thaliana OX=3702 GN=NTR1 PE=1 SV=3	--	--	NADPH-dependent thioredoxin reductase B [Artemisia annua]	molecular function: catalytic activity (GO:0003824);; molecular function: antioxidant activity (GO:0016209);; biological process: metabolic process (GO:0008152);; biological process: cellular process (GO:0009987);; biological process: single-organism process (GO:0044699);; biological process: response to stimulus (GO:0050896);; biological process: detoxification (GO:0098754);; cellular component:…
evm.TU.scaffold_400.245	evm.TU.scaffold_400.245	9.63471	197	10.2968	244	8.00862	151	13.9068	263	18.5359	377	14.2862	251	0.0152155	0.659565	up	[J]	Translation, ribosomal structure and biogenesis	Molecular Function: ribonuclease III activity (GO:0004525);; Biological Process: RNA processing (GO:0006396);;	--	--	--	--	Ribonuclease III domain	--	--	--	Ribonuclease III domain-containing protein [Artemisia annua]	molecular function: catalytic activity (GO:0003824);; biological process: metabolic process (GO:0008152);; biological process: cellular process (GO:0009987)
evm.TU.scaffold_1120.54	evm.TU.scaffold_1120.54	95.6303	1807	94.2498	2062	72.232	1255	169.297	2963	147.028	2765	155.878	2532	5e-06	0.795275	up	[J]	Translation, ribosomal structure and biogenesis	Molecular Function: RNA binding (GO:0003723);;	--	--	[R]	General function prediction only	RNA recognition motif. (a.k.a. RRM, RBD, or RNP domain)	29 kDa ribonucleoprotein A, chloroplastic OS=Nicotiana sylvestris OX=4096 PE=2 SV=1	--	--	Nucleotide-binding, alpha-beta plait [Artemisia annua]	molecular function: binding (GO:0005488)
evm.TU.scaffold_1436.89	evm.TU.scaffold_1436.89	1.97349	65	1.22892	47	0.775934	24	4.14764	127	4.02512	132	3.77595	107	0.000751688	1.18858	up	--	--	Biological Process: response to red or far red light (GO:0009639);; Biological Process: negative gravitropism (GO:0009959);;	--	--	--	--	Plant protein of unknown function (DUF641)	Protein GRAVITROPIC IN THE LIGHT 1 OS=Arabidopsis thaliana OX=3702 GN=GIL1 PE=1 SV=1	--	--	hypothetical protein CTI12_AA439120 [Artemisia annua]	biological process: response to stimulus (GO:0050896)
evm.TU.scaffold_1012.173	evm.TU.scaffold_1012.173	4.90137	107	5.10332	129	4.96781	100	10.9019	220	8.04895	175	7.74682	146	0.0124965	0.729148	up	--	--	Cellular Component: photosystem I (GO:0009522);; Cellular Component: photosystem II (GO:0009523);; Cellular Component: chloroplast thylakoid membrane (GO:0009535);; Biological Process: photosynthesis, light harvesting (GO:0009765);; Cellular Component: integral component of membrane (GO:0016021);; Molecular Function: chlorophyll binding (GO:0016168);; Biological Process: protein-chromophore linka…	--	--	--	--	Chlorophyll A-B binding protein	Chlorophyll a-b binding protein 6A, chloroplastic OS=Solanum lycopersicum OX=4081 GN=CAB6A PE=2 SV=1	--	--	Chlorophyll A-B binding protein [Artemisia annua]	cellular component: cell (GO:0005623);; cellular component: membrane (GO:0016020);; cellular component: macromolecular complex (GO:0032991);; cellular component: membrane part (GO:0044425);; cellular component: cell part (GO:0044464);; cellular component: organelle (GO:0043226);; cellular component: organelle part (GO:0044422);; biological process: metabolic process (GO:0008152);; biological proc…
evm.TU.scaffold_110.31	evm.TU.scaffold_110.31	0.849458	35	1.05577	50	1.39315	52	2.39005	90	1.96689	80	2.11544	74	0.0490618	0.771587	up	[QV]	Secondary metabolites biosynthesis, transport and catabolism;; Defense mechanisms	Molecular Function: monooxygenase activity (GO:0004497);; Molecular Function: iron ion binding (GO:0005506);; Molecular Function: oxidoreductase activity, acting on paired donors, with incorporation or reduction of molecular oxygen (GO:0016705);; Molecular Function: heme binding (GO:0020037);;	--	--	[QI]	Secondary metabolites biosynthesis, transport and catabolism;; Lipid transport and metabolism	Cytochrome P450	Carotene epsilon-monooxygenase, chloroplastic OS=Arabidopsis thaliana OX=3702 GN=CYP97C1 PE=1 SV=1	--	--	cytochrome P450 monooxygenase CYP97C [Chrysanthemum x morifolium]	molecular function: catalytic activity (GO:0003824);; biological process: metabolic process (GO:0008152);; biological process: single-organism process (GO:0044699);; molecular function: binding (GO:0005488)
Chrysanthemum_x_morifolium_newGene_72420	--	0.301397	5	0.466127	8	1.01862	14	2.90926	32	3.37021	37	3.37408	27	0.0232572	1.04847	up	--	--	--	--	--	--	--	--	--	--	--	--	--
Chrysanthemum_x_morifolium_newGene_12763	--	4.38683	89	5.09637	118	4.24879	76	1.86749	35	2.61619	52	2.58688	45	0.0455527	-0.765287	down	--	--	--	--	--	--	--	--	IQ domain-containing protein IQM2 OS=Arabidopsis thaliana OX=3702 GN=IQM2 PE=2 SV=1	S	Function unknown	IQ domain-containing protein IQM2-like [Durio zibethinus]	--
evm.TU.scaffold_2548.431	evm.TU.scaffold_2548.431	0.608606	49	0.51275	48	0.357337	27	1.5395	114	1.17236	93	1.18049	81	0.00215688	1.06848	up	--	--	Biological Process: regulation of photoperiodism, flowering (GO:2000028);;	--	--	--	--	--	Protein GIGANTEA OS=Arabidopsis thaliana OX=3702 GN=GI PE=1 SV=2	--	--	gigantea-like [Chrysanthemum seticuspe f. boreale]	biological process: biological regulation (GO:0065007)
evm.TU.scaffold_981.148	evm.TU.scaffold_981.148	24.5263	564	30.7672	819	24.1293	511	44.8707	956	39.7494	910	41.2876	816	0.000781468	0.622896	up	[F]	Nucleotide transport and metabolism	Molecular Function: catalytic activity (GO:0003824);;	--	--	--	--	Protein of unknown function (DUF561)	Uncharacterized protein ycf23 OS=Porphyra purpurea OX=2787 GN=ycf23 PE=3 SV=1	--	--	hypothetical protein CTI12_AA317750 [Artemisia annua]	molecular function: catalytic activity (GO:0003824)
Chrysanthemum_x_morifolium_newGene_64104	--	2.22102	72	3.75818	134	2.57132	66	1.12382	36	0.914379	35	1.16225	39	0.0320764	-0.861637	down	--	--	Molecular Function: nucleic acid binding (GO:0003676);; Cellular Component: nucleolus organizer region (GO:0005731);; Cellular Component: mitochondrion (GO:0005739);; Biological Process: male meiotic nuclear division (GO:0007140);; Biological Process: female meiotic nuclear division (GO:0007143);; Biological Process: megagametogenesis (GO:0009561);; Biological Process: histone H3-K9 demethylation…	K11593|1.80696e-36|bna:106396342|K11593 eukaryotic translation initiation factor 2C | (RefSeq) protein argonaute 5-like	--	[J]	Translation, ribosomal structure and biogenesis	Piwi domain	Protein argonaute MEL1 OS=Oryza sativa subsp. japonica OX=39947 GN=MEL1 PE=2 SV=1	J	Translation, ribosomal structure and biogenesis	PREDICTED: protein argonaute MEL1-like, partial [Nicotiana tabacum]	molecular function: binding (GO:0005488);; cellular component: cell (GO:0005623);; cellular component: membrane-enclosed lumen (GO:0031974);; cellular component: macromolecular complex (GO:0032991);; cellular component: organelle (GO:0043226);; cellular component: organelle part (GO:0044422);; cellular component: cell part (GO:0044464);; biological process: reproduction (GO:0000003);; biological …
evm.TU.scaffold_506.194	evm.TU.scaffold_506.194	0.300234	10	0.479672	18	0.494072	15	1.42475	43	1.13335	37	1.47035	41	0.013282	1.0643	up	[IQ]	Lipid transport and metabolism;; Secondary metabolites biosynthesis, transport and catabolism	Biological Process: fatty acid biosynthetic process (GO:0006633);; Molecular Function: transferase activity, transferring acyl groups other than amino-acyl groups (GO:0016747);;	--	--	[IQ]	Lipid transport and metabolism;; Secondary metabolites biosynthesis, transport and catabolism	Beta-ketoacyl synthase, N-terminal domain	3-oxoacyl-[acyl-carrier-protein] synthase I, chloroplastic OS=Arabidopsis thaliana OX=3702 GN=KAS1 PE=1 SV=2	--	--	3-oxoacyl-[acyl-carrier-protein] synthase 2 [Artemisia annua]	biological process: metabolic process (GO:0008152);; biological process: cellular process (GO:0009987);; biological process: single-organism process (GO:0044699);; molecular function: catalytic activity (GO:0003824)
evm.TU.scaffold_199.33	evm.TU.scaffold_199.33	1.14863	27	2.28701	61	0.970402	21	6.94632	147	6.99921	159	11.0328	216	7.94e-09	1.82718	up	[IR]	Lipid transport and metabolism;; General function prediction only	Molecular Function: hydrolase activity, acting on ester bonds (GO:0016788);;	--	--	--	--	GDSL-like Lipase/Acylhydrolase	GDSL esterase/lipase LTL1 OS=Arabidopsis thaliana OX=3702 GN=LTL1 PE=2 SV=1	--	--	GDSL esterase/lipase LTL1 [Helianthus annuus]	molecular function: catalytic activity (GO:0003824)
evm.TU.scaffold_665.45	evm.TU.scaffold_665.45	34.5251	2055	32.8707	2266	26.9008	1473	54.7535	3019	48.6546	2882	53.8013	2753	3.3e-05	0.694403	up	[J]	Translation, ribosomal structure and biogenesis	Molecular Function: ion channel activity (GO:0005216);; Cellular Component: integral component of membrane (GO:0016021);;	--	--	[PT]	Inorganic ion transport and metabolism;; Signal transduction mechanisms	RNA recognition motif. (a.k.a. RRM, RBD, or RNP domain)	Protein CNGC15c OS=Medicago truncatula OX=3880 GN=CNGC15C PE=1 SV=1	--	--	potassium channel, voltage-dependent, ELK [Artemisia annua]	molecular function: transporter activity (GO:0005215);; biological process: localization (GO:0051179);; cellular component: membrane (GO:0016020);; cellular component: membrane part (GO:0044425)
evm.TU.scaffold_1180.248	evm.TU.scaffold_1180.248	47.2945	1054	53.672	1385	43.5809	894	88.7823	1833	79.923	1773	80.4536	1542	5.78e-07	0.746702	up	[J]	Translation, ribosomal structure and biogenesis	Molecular Function: RNA binding (GO:0003723);;	--	--	[R]	General function prediction only	RNA recognition motif. (a.k.a. RRM, RBD, or RNP domain)	31 kDa ribonucleoprotein, chloroplastic OS=Nicotiana sylvestris OX=4096 PE=1 SV=1	--	--	31 kDa ribonucleoprotein [Artemisia annua]	molecular function: binding (GO:0005488)
evm.TU.scaffold_1829.122	evm.TU.scaffold_1829.122	2.56212	116	1.45165	77	2.1069	88	3.94794	166	3.72456	168	3.49362	136	0.0374365	0.723996	up	[J]	Translation, ribosomal structure and biogenesis	Biological Process: tRNA modification (GO:0006400);; Molecular Function: methylthiotransferase activity (GO:0035596);; Molecular Function: 4 iron, 4 sulfur cluster binding (GO:0051539);;	--	--	[T]	Signal transduction mechanisms	Radical SAM superfamily	CDK5RAP1-like protein OS=Arabidopsis thaliana OX=3702 GN=At4g36390 PE=2 SV=1	--	--	methylthiotransferase [Artemisia annua]	biological process: metabolic process (GO:0008152);; biological process: cellular process (GO:0009987);; molecular function: catalytic activity (GO:0003824);; molecular function: binding (GO:0005488)
Chrysanthemum_x_morifolium_newGene_77456	--	7.06337	222	8.54893	311	8.99497	260	4.79324	140	2.82771	89	4.1364	112	0.000942565	-0.926454	down	[L]	Replication, recombination and repair	Biological Process: regulation of transcription, DNA-templated (GO:0006355);; Molecular Function: zinc ion binding (GO:0008270);;	--	--	[KT]	Transcription;; Signal transduction mechanisms	P-loop containing NTP hydrolase pore-1	Protein FORGETTER 1 OS=Arabidopsis thaliana OX=3702 GN=FGT1 PE=1 SV=1	S	Function unknown	Protein strawberry notch-like protein [Cynara cardunculus var. scolymus]	biological process: biological regulation (GO:0065007);; molecular function: binding (GO:0005488)
evm.TU.scaffold_1724.298	evm.TU.scaffold_1724.298	12.2343	274	13.1402	340	12.6538	260	19.6118	406	20.5771	458	19.3707	372	0.00096604	0.608006	up	--	--	Molecular Function: structural constituent of ribosome (GO:0003735);; Cellular Component: ribosome (GO:0005840);; Biological Process: translation (GO:0006412);;	--	--	[J]	Translation, ribosomal structure and biogenesis	Ribosomal protein L13e	60S ribosomal protein L13-1 OS=Arabidopsis thaliana OX=3702 GN=RPL13B PE=1 SV=1	--	--	ribosomal protein L13e [Artemisia annua]	molecular function: structural molecule activity (GO:0005198);; cellular component: cell (GO:0005623);; cellular component: macromolecular complex (GO:0032991);; cellular component: organelle (GO:0043226);; cellular component: cell part (GO:0044464);; biological process: metabolic process (GO:0008152);; biological process: cellular process (GO:0009987)
Chrysanthemum_x_morifolium_newGene_50468	--	0.430521	10	0.613987	16	0.859417	17	1.54745	31	1.94121	41	2.33415	43	0.03138	0.979784	up	--	--	--	--	--	--	--	--	--	--	--	uncharacterized protein LOC111904992 isoform X2 [Lactuca sativa]	--
evm.TU.scaffold_1296.32	evm.TU.scaffold_1296.32	1.4207	62	1.68735	86	1.7439	70	2.30425	94	3.42258	149	2.94198	111	0.0489193	0.703627	up	--	--	--	--	--	--	--	Domain of unknown function (DUF569)	--	--	--	hypothetical protein CTI12_AA443420 [Artemisia annua]	--
evm.TU.scaffold_1021.247	evm.TU.scaffold_1021.247	1.27966	106	1.32733	127	1.16617	89	1.70659	131	2.20964	181	2.6282	186	0.0385926	0.675664	up	[O]	Posttranslational modification, protein turnover, chaperones	Molecular Function: metalloendopeptidase activity (GO:0004222);; Molecular Function: ATP binding (GO:0005524);;	--	--	[O]	Posttranslational modification, protein turnover, chaperones	ATPase family associated with various cellular activities (AAA)	Probable inactive ATP-dependent zinc metalloprotease FTSHI 5, chloroplastic OS=Arabidopsis thaliana OX=3702 GN=FTSHI5 PE=2 SV=1	--	--	ftsH extracellular protease family [Artemisia annua]	molecular function: catalytic activity (GO:0003824);; biological process: metabolic process (GO:0008152);; molecular function: binding (GO:0005488)
evm.TU.scaffold_11341.50	evm.TU.scaffold_11341.50	5.86234	61	6.06386	73	6.6227	64	2.52191	25	2.39282	25	3.27471	30	0.0295601	-0.877984	down	--	--	--	--	--	--	--	--	--	--	--	--	--
Chrysanthemum_x_morifolium_newGene_93375	--	0	0	0.268202	6	0.227491	4	1.57721	28	2.27269	39	3.57478	57	3.67e-05	1.62088	up	[IQ]	Lipid transport and metabolism;; Secondary metabolites biosynthesis, transport and catabolism	Biological Process: fatty acid biosynthetic process (GO:0006633);; Molecular Function: beta-ketoacyl-acyl-carrier-protein synthase II activity (GO:0033817);;	K09458|3.32862e-82|sind:105175693|K09458 3-oxoacyl-[acyl-carrier-protein] synthase II [EC:2.3.1.179] | (RefSeq) 3-oxoacyl-[acyl-carrier-protein] synthase I, chloroplastic	Fatty acid biosynthesis (ko00061);; Biotin metabolism (ko00780);; Fatty acid metabolism (ko01212)	[IQ]	Lipid transport and metabolism;; Secondary metabolites biosynthesis, transport and catabolism	--	3-oxoacyl-[acyl-carrier-protein] synthase I, chloroplastic OS=Hordeum vulgare OX=4513 GN=KAS12 PE=1 SV=1	I	Lipid transport and metabolism	3-oxoacyl-[acyl-carrier-protein] synthase I, chloroplastic-like [Lactuca sativa]	biological process: metabolic process (GO:0008152);; biological process: cellular process (GO:0009987);; biological process: single-organism process (GO:0044699);; molecular function: catalytic activity (GO:0003824)
evm.TU.scaffold_1242.86	evm.TU.scaffold_1242.86	2.53186	82	2.46539	92	2.41077	72	0.95322	29	1.25068	40	1.17284	33	0.0137133	-0.898504	down	--	--	Molecular Function: protein serine/threonine phosphatase activity (GO:0004722);; Molecular Function: metal ion binding (GO:0046872);;	--	--	[T]	Signal transduction mechanisms	Protein phosphatase 2C	Protein phosphatase 2C 3 OS=Arabidopsis thaliana OX=3702 GN=AIP1 PE=1 SV=1	--	--	Protein phosphatase 2C [Artemisia annua]	molecular function: catalytic activity (GO:0003824);; biological process: metabolic process (GO:0008152);; biological process: cellular process (GO:0009987);; molecular function: binding (GO:0005488)
evm.TU.scaffold_1492.177	evm.TU.scaffold_1492.177	9.64346	126	14.3097	216	8.40213	101	4.68618	57	4.80436	63	4.11581	47	0.0022963	-1.00941	down	[IQR]	Lipid transport and metabolism;; Secondary metabolites biosynthesis, transport and catabolism;; General function prediction only	Molecular Function: oxidoreductase activity (GO:0016491);;	--	--	[R]	General function prediction only	Enoyl-(Acyl carrier protein) reductase	Secoisolariciresinol dehydrogenase (Fragment) OS=Forsythia intermedia OX=55183 PE=1 SV=1	--	--	Glucose/ribitol dehydrogenase [Artemisia annua]	molecular function: catalytic activity (GO:0003824)
evm.TU.scaffold_9627.362	evm.TU.scaffold_9627.362	7.36303	165	9.55131	248	8.42709	174	22.8472	474	14.0543	314	14.0106	270	0.00220245	0.871016	up	[O]	Posttranslational modification, protein turnover, chaperones	Molecular Function: peroxidase activity (GO:0004601);; Biological Process: cell redox homeostasis (GO:0045454);; Molecular Function: peroxiredoxin activity (GO:0051920);;	--	--	[O]	Posttranslational modification, protein turnover, chaperones	Redoxin	Peroxiredoxin-2E-1, chloroplastic OS=Oryza sativa subsp. japonica OX=39947 GN=PRXIIE-1 PE=2 SV=1	--	--	Redoxin [Artemisia annua]	molecular function: catalytic activity (GO:0003824);; molecular function: antioxidant activity (GO:0016209);; biological process: metabolic process (GO:0008152);; biological process: cellular process (GO:0009987);; biological process: single-organism process (GO:0044699);; biological process: response to stimulus (GO:0050896);; biological process: detoxification (GO:0098754);; biological process:…
evm.TU.scaffold_9466.10	evm.TU.scaffold_9466.10	0	0	0.21551	3	0	0	2.35679	24	2.47038	27	2.33328	22	0.000145121	1.49811	up	--	--	Biological Process: reproduction (GO:0000003);; Biological Process: developmental process involved in reproduction (GO:0003006);; Cellular Component: cellular_component (GO:0005575);; Cellular Component: intracellular (GO:0005622);; Cellular Component: cell (GO:0005623);; Cellular Component: nucleus (GO:0005634);; Cellular Component: cytoplasm (GO:0005737);; Biological Process: multicellular orga…	--	--	[R]	General function prediction only	Phosphatidylethanolamine-binding protein	CEN-like protein 2 OS=Nicotiana tabacum OX=4097 GN=CET2 PE=2 SV=1	--	--	TFL1-like protein [Chrysanthemum x morifolium]	biological process: reproduction (GO:0000003);; biological process: reproductive process (GO:0022414);; biological process: developmental process (GO:0032502);; cellular component: cell (GO:0005623);; cellular component: cell part (GO:0044464);; cellular component: organelle (GO:0043226);; biological process: multicellular organismal process (GO:0032501);; biological process: single-organism proc…
evm.TU.scaffold_1996.6	evm.TU.scaffold_1996.6	24.3682	303	27.1265	390	32.4762	371	11.1362	128	14.6548	181	15.8194	169	0.000153733	-0.913805	down	--	--	--	--	--	--	--	--	--	--	--	hypothetical protein E3N88_37439 [Mikania micrantha]	--
evm.TU.scaffold_asm16_new.2725	evm.TU.scaffold_asm16_new.2725	9.53097	155	8.75519	165	11.6954	175	18.4727	278	15.2345	247	18.6496	261	0.00425309	0.72561	up	[O]	Posttranslational modification, protein turnover, chaperones	Molecular Function: adenyl-nucleotide exchange factor activity (GO:0000774);; Cellular Component: mitochondrial matrix (GO:0005759);; Biological Process: protein folding (GO:0006457);; Molecular Function: protein homodimerization activity (GO:0042803);; Molecular Function: chaperone binding (GO:0051087);;	--	--	[O]	Posttranslational modification, protein turnover, chaperones	GrpE	--	--	--	grpE nucleotide exchange factor [Artemisia annua]	molecular function: binding (GO:0005488);; molecular function: molecular function regulator (GO:0098772);; biological process: biological regulation (GO:0065007);; cellular component: cell (GO:0005623);; cellular component: membrane-enclosed lumen (GO:0031974);; cellular component: organelle (GO:0043226);; cellular component: organelle part (GO:0044422);; cellular component: cell part (GO:0044464…
evm.TU.scaffold_6398.17	evm.TU.scaffold_6398.17	9.86546	481	9.02528	510	9.78315	439	3.07747	139	4.42022	215	2.45359	103	1.14e-08	-1.34704	down	[I]	Lipid transport and metabolism	Molecular Function: ligase activity (GO:0016874);;	--	--	[I]	Lipid transport and metabolism	AMP-binding enzyme	Long chain acyl-CoA synthetase 4 OS=Arabidopsis thaliana OX=3702 GN=LACS4 PE=2 SV=1	--	--	AMP-dependent synthetase/ligase [Artemisia annua]	molecular function: catalytic activity (GO:0003824)
evm.TU.scaffold_1318.66	evm.TU.scaffold_1318.66	2.15946	100	2.05019	110	2.14825	91	3.87686	166	3.96854	182	3.47227	138	0.00612851	0.738666	up	[E]	Amino acid transport and metabolism	Molecular Function: serine-type peptidase activity (GO:0008236);;	--	--	[O]	Posttranslational modification, protein turnover, chaperones	Prolyl oligopeptidase family	Acylamino-acid-releasing enzyme OS=Arabidopsis thaliana OX=3702 GN=AARE PE=1 SV=1	--	--	acylaminoacyl-peptidase-related protein [Artemisia annua]	molecular function: catalytic activity (GO:0003824);; biological process: metabolic process (GO:0008152)
evm.TU.scaffold_843.67	evm.TU.scaffold_843.67	2.49481	101	3.41568	159	3.07718	114	1.23193	46	0.483526	20	0.675467	24	4.57e-05	-1.40293	down	[O]	Posttranslational modification, protein turnover, chaperones	--	--	--	--	--	Glyoxal oxidase N-terminus	Aldehyde oxidase GLOX1 OS=Arabidopsis thaliana OX=3702 GN=GLOX1 PE=2 SV=1	--	--	glyoxal oxidase-related protein [Artemisia annua]	--
Chrysanthemum_x_morifolium_newGene_32182	--	6.43006	299	5.60596	302	7.02317	300	3.12852	135	4.32175	200	3.62238	145	0.0068687	-0.707346	down	--	--	Molecular Function: nucleotide binding (GO:0000166);;	--	--	[UR]	Intracellular trafficking, secretion, and vesicular transport;; General function prediction only	--	Dynamin-related protein 4C OS=Arabidopsis thaliana OX=3702 GN=DRP4C PE=2 SV=1	S	Function unknown	dynamin-related protein 4C-like [Helianthus annuus]	molecular function: binding (GO:0005488)
evm.TU.scaffold_924.41	evm.TU.scaffold_924.41	5.64787	136	5.34361	149	6.23801	138	8.19201	183	10.6162	255	8.57297	178	0.0374365	0.601829	up	--	--	Cellular Component: integral component of membrane (GO:0016021);;	--	--	--	--	Protein CHAPERONE-LIKE PROTEIN OF POR1-like	--	--	--	chloroplast J-like domain 1 [Artemisia annua]	cellular component: membrane (GO:0016020);; cellular component: membrane part (GO:0044425)
evm.TU.scaffold_924.233	evm.TU.scaffold_924.233	13.9509	588	11.8211	577	6.44725	250	7.0636	276	4.42368	186	4.67811	170	0.0254992	-0.815548	down	[R]	General function prediction only	--	--	--	[MW]	Cell wall/membrane/envelope biogenesis;; Extracellular structures	Fasciclin domain	Fasciclin-like arabinogalactan protein 17 OS=Arabidopsis thaliana OX=3702 GN=FLA17 PE=2 SV=1	--	--	FAS1 domain-containing protein [Artemisia annua]	--
evm.TU.scaffold_940.156	evm.TU.scaffold_940.156	1.00822	36	1.68063	70	1.7907	59	2.86547	95	2.77818	99	3.84204	118	0.0239556	0.851918	up	--	--	Molecular Function: RNA binding (GO:0003723);; Molecular Function: RNA helicase activity (GO:0003724);; Molecular Function: ATP binding (GO:0005524);; Cellular Component: nucleolus (GO:0005730);;	--	--	--	--	--	RAP domain-containing protein, chloroplastic OS=Arabidopsis thaliana OX=3702 GN=RAP PE=1 SV=1	--	--	hydrolase [Artemisia annua]	molecular function: binding (GO:0005488);; molecular function: catalytic activity (GO:0003824);; cellular component: cell (GO:0005623);; cellular component: organelle (GO:0043226);; cellular component: organelle part (GO:0044422);; cellular component: cell part (GO:0044464)
evm.TU.scaffold_911.176	evm.TU.scaffold_911.176	5.03628	198	5.7614	263	5.35537	194	10.5439	384	7.37149	289	8.89088	301	0.008809	0.659587	up	[IQ]	Lipid transport and metabolism;; Secondary metabolites biosynthesis, transport and catabolism	Biological Process: fatty acid biosynthetic process (GO:0006633);; Molecular Function: transferase activity, transferring acyl groups other than amino-acyl groups (GO:0016747);;	--	--	[IQ]	Lipid transport and metabolism;; Secondary metabolites biosynthesis, transport and catabolism	Beta-ketoacyl synthase, N-terminal domain	3-oxoacyl-[acyl-carrier-protein] synthase II, chloroplastic OS=Arabidopsis thaliana OX=3702 GN=KAS2 PE=1 SV=1	--	--	fatty acid biosynthesis 1 [Artemisia annua]	biological process: metabolic process (GO:0008152);; biological process: cellular process (GO:0009987);; biological process: single-organism process (GO:0044699);; molecular function: catalytic activity (GO:0003824)
evm.TU.scaffold_asm7_new.802	evm.TU.scaffold_asm7_new.802	8.29188	77	9.17961	99	11.5651	99	5.39996	47	4.50216	42	4.67598	38	0.0354857	-0.790189	down	--	--	--	--	--	--	--	--	--	--	--	F-box domain, cyclin-like protein [Artemisia annua]	--
evm.TU.scaffold_1348.270	evm.TU.scaffold_1348.270	9.29843	379	8.82996	417	8.60287	323	15.1848	574	14.4164	585	12.7881	448	0.000778914	0.623769	up	[O]	Posttranslational modification, protein turnover, chaperones	Molecular Function: ATP binding (GO:0005524);;	--	--	[O]	Posttranslational modification, protein turnover, chaperones	Hsp70 protein	Luminal-binding protein 5 OS=Nicotiana tabacum OX=4097 GN=BIP5 PE=2 SV=1	--	--	luminal-binding protein 5 [Helianthus annuus]	molecular function: binding (GO:0005488)
evm.TU.scaffold_732.244	evm.TU.scaffold_732.244	2.86727	65	2.58233	68	3.39298	71	9.83568	205	4.29158	96	7.53874	146	0.00741448	0.986499	up	[O]	Posttranslational modification, protein turnover, chaperones	Molecular Function: peroxidase activity (GO:0004601);; Biological Process: cell redox homeostasis (GO:0045454);; Molecular Function: peroxiredoxin activity (GO:0051920);;	--	--	[O]	Posttranslational modification, protein turnover, chaperones	Redoxin	Peroxiredoxin-2E-1, chloroplastic OS=Oryza sativa subsp. japonica OX=39947 GN=PRXIIE-1 PE=2 SV=1	--	--	Redoxin [Artemisia annua]	molecular function: catalytic activity (GO:0003824);; molecular function: antioxidant activity (GO:0016209);; biological process: metabolic process (GO:0008152);; biological process: cellular process (GO:0009987);; biological process: single-organism process (GO:0044699);; biological process: response to stimulus (GO:0050896);; biological process: detoxification (GO:0098754);; biological process:…
Chrysanthemum_x_morifolium_newGene_40902	--	3.3633	46	3.0183	48	7.68241	96	0.895136	12	1.55949	22	0.424017	5	0.00652881	-1.1889	down	--	--	--	--	--	--	--	--	--	--	--	--	--
evm.TU.scaffold_228.24	evm.TU.scaffold_228.24	2.50531	239	2.50591	277	1.85318	163	3.80712	337	3.97536	378	4.43644	364	0.00151248	0.751099	up	[J]	Translation, ribosomal structure and biogenesis	Molecular Function: translation initiation factor activity (GO:0003743);; Molecular Function: GTPase activity (GO:0003924);; Molecular Function: GTP binding (GO:0005525);;	--	--	[J]	Translation, ribosomal structure and biogenesis	Elongation factor Tu GTP binding domain	Translation initiation factor IF-2, chloroplastic OS=Rhodomonas salina OX=52970 GN=infB PE=3 SV=1	--	--	eukaryotic translation initiation factor 2 (eIF-2) family protein [Artemisia annua]	molecular function: binding (GO:0005488);; biological process: metabolic process (GO:0008152);; biological process: cellular process (GO:0009987);; molecular function: catalytic activity (GO:0003824)
evm.TU.scaffold_8147.16	evm.TU.scaffold_8147.16	5.5777	163	3.1192	106	4.33329	117	1.66703	46	2.56147	75	1.47059	37	0.0202907	-0.907114	down	[I]	Lipid transport and metabolism	Biological Process: lipid metabolic process (GO:0006629);; Cellular Component: integral component of membrane (GO:0016021);; Molecular Function: oxidoreductase activity, acting on paired donors, with oxidation of a pair of donors resulting in the reduction of molecular oxygen to two molecules of water (GO:0016717);;	--	--	--	--	Fatty acid desaturase	Acyl-lipid (9+3)-(E)-desaturase OS=Dimorphotheca sinuata OX=112408 PE=1 SV=1	--	--	Fatty acid desaturase, type 1 [Artemisia annua]	biological process: metabolic process (GO:0008152);; biological process: single-organism process (GO:0044699);; cellular component: membrane (GO:0016020);; cellular component: membrane part (GO:0044425);; molecular function: catalytic activity (GO:0003824)
Chrysanthemum_x_morifolium_newGene_57614	--	3.23934	206	4.15713	461	3.51517	316	1.98656	121	3.47042	176	3.07149	159	0.0169285	-0.796164	down	[T]	Signal transduction mechanisms	Molecular Function: ATP binding (GO:0005524);; Biological Process: transport (GO:0006810);; Cellular Component: integral component of membrane (GO:0016021);; Molecular Function: ATPase activity (GO:0016887);;	--	--	[Q]	Secondary metabolites biosynthesis, transport and catabolism	ABC-2 type transporter;; ABC transporter;; Plant PDR ABC transporter associated;; AAA domain, putative AbiEii toxin, Type IV TA system;; ATPase family associated with various cellular activities (AAA);; ABC-2 type transporter	ABC transporter G family member 35 OS=Arabidopsis thaliana OX=3702 GN=ABCG35 PE=2 SV=1	V	Defense mechanisms	putative pleiotropic drug resistance protein PDR/CDR [Helianthus annuus]	molecular function: binding (GO:0005488);; biological process: localization (GO:0051179);; cellular component: membrane (GO:0016020);; cellular component: membrane part (GO:0044425);; molecular function: catalytic activity (GO:0003824)
evm.TU.scaffold_1182.42	evm.TU.scaffold_1182.42	8.34103	369	10.2365	524	10.1612	413	14.4882	593	16.5447	728	14.9472	568	0.000523118	0.638265	up	[O]	Posttranslational modification, protein turnover, chaperones	Molecular Function: ATP binding (GO:0005524);; Biological Process: protein refolding (GO:0042026);;	--	--	[O]	Posttranslational modification, protein turnover, chaperones	TCP-1/cpn60 chaperonin family	RuBisCO large subunit-binding protein subunit alpha, chloroplastic OS=Pisum sativum OX=3888 PE=1 SV=2	--	--	ruBisCO large subunit-binding protein subunit alpha protein [Artemisia annua]	molecular function: binding (GO:0005488);; biological process: cellular process (GO:0009987)
Chrysanthemum_x_morifolium_newGene_2288	--	3.55879	79	2.70248	70	1.60393	34	0.704957	16	0.592766	14	1.10149	22	0.0168911	-1.04712	down	[P]	Inorganic ion transport and metabolism	Molecular Function: transporter activity (GO:0005215);; Biological Process: transport (GO:0006810);; Cellular Component: integral component of membrane (GO:0016021);;	--	--	[P]	Inorganic ion transport and metabolism	--	Metal transporter Nramp5 OS=Oryza sativa subsp. japonica OX=39947 GN=NRAMP5 PE=2 SV=1	P	Inorganic ion transport and metabolism	metal transporter Nramp5-like [Helianthus annuus]	molecular function: transporter activity (GO:0005215);; biological process: localization (GO:0051179);; cellular component: membrane (GO:0016020);; cellular component: membrane part (GO:0044425)
evm.TU.scaffold_1047.349	evm.TU.scaffold_1047.349	2.12151	95	2.11546	110	1.99447	82	5.49608	227	3.97547	177	4.56466	175	5.59e-05	1.0227	up	[R]	General function prediction only	--	--	--	[H]	Coenzyme transport and metabolism	CobW/HypB/UreG, nucleotide-binding domain	--	--	--	plastid transcriptionally active 17 [Artemisia annua]	--
evm.TU.scaffold_14.169	evm.TU.scaffold_14.169	5.3979	210	7.28286	328	6.34296	227	9.98799	360	11.7749	456	10.2266	342	0.00220995	0.688656	up	--	--	Cellular Component: integral component of membrane (GO:0016021);;	--	--	--	--	CemA family	Chloroplast envelope membrane protein OS=Rhodomonas salina OX=52970 GN=cemA PE=3 SV=1	--	--	Chloroplast envelope membrane protein, CemA [Artemisia annua]	cellular component: membrane (GO:0016020);; cellular component: membrane part (GO:0044425)
evm.TU.scaffold_952.47	evm.TU.scaffold_952.47	5.6703	129	2.95545	78	5.87997	123	1.39114	30	2.09369	48	0.513344	11	0.00591613	-1.15612	down	[IR]	Lipid transport and metabolism;; General function prediction only	Molecular Function: hydrolase activity, acting on ester bonds (GO:0016788);;	--	--	--	--	GDSL-like Lipase/Acylhydrolase	GDSL esterase/lipase At5g37690 OS=Arabidopsis thaliana OX=3702 GN=At5g37690 PE=2 SV=1	--	--	SGNH hydrolase-type esterase superfamily protein [Artemisia annua]	molecular function: catalytic activity (GO:0003824)
Chrysanthemum_x_morifolium_newGene_77513	--	0.288885	6	0.332582	7	0.248089	5	0.946843	16	1.95005	35	1.40428	22	0.0268984	1.03598	up	--	--	--	--	--	[R]	General function prediction only	--	31 kDa ribonucleoprotein, chloroplastic OS=Nicotiana sylvestris OX=4096 PE=1 SV=1	--	--	PREDICTED: 31 kDa ribonucleoprotein, chloroplastic-like [Pyrus x bretschneideri]	--
evm.TU.scaffold_599.145	evm.TU.scaffold_599.145	3.16139	41	3.79241	57	2.29372	28	0	0	0	0	0	0	4.41e-09	-2.13469	down	--	--	Biological Process: protein folding (GO:0006457);; Cellular Component: prefoldin complex (GO:0016272);; Molecular Function: unfolded protein binding (GO:0051082);;	--	--	[O]	Posttranslational modification, protein turnover, chaperones	Prefoldin subunit	--	--	--	prefoldin [Artemisia annua]	biological process: cellular process (GO:0009987);; cellular component: macromolecular complex (GO:0032991);; molecular function: binding (GO:0005488)
evm.TU.scaffold_8568.36	evm.TU.scaffold_8568.36	13.0112	466	17.2735	717	14.3189	472	37.9063	1258	36.3813	1297	38.8978	1198	1.04e-17	1.27138	up	[L]	Replication, recombination and repair	--	--	--	[LT]	Replication, recombination and repair;; Signal transduction mechanisms	DNA photolyase	Blue-light photoreceptor PHR2 OS=Arabidopsis thaliana OX=3702 GN=PHR2 PE=2 SV=2	--	--	blue-light photoreceptor PHR2-like [Cynara cardunculus var. scolymus]	--
evm.TU.scaffold_1693.162	evm.TU.scaffold_1693.162	8.17527	157	9.83588	219	10.3374	183	4.96905	89	5.73176	110	6.54396	109	0.0406695	-0.630809	down	--	--	Molecular Function: molecular_function (GO:0003674);; Molecular Function: binding (GO:0005488);; Cellular Component: cellular_component (GO:0005575);; Cellular Component: cell (GO:0005623);; Cellular Component: plasma membrane (GO:0005886);; Biological Process: cell communication (GO:0007154);; Biological Process: cell-cell signaling (GO:0007267);; Biological Process: biological_process (GO:00081…	--	--	--	--	Remorin, C-terminal region	Remorin OS=Solanum tuberosum OX=4113 PE=1 SV=1	--	--	Remorin, C-terminal [Artemisia annua]	molecular function: binding (GO:0005488);; cellular component: cell (GO:0005623);; cellular component: membrane (GO:0016020);; cellular component: cell part (GO:0044464);; biological process: cellular process (GO:0009987);; biological process: signaling (GO:0023052);; biological process: single-organism process (GO:0044699)
evm.TU.scaffold_1113.135	evm.TU.scaffold_1113.135	6.37436	340	10.9458	677	9.51988	467	13.326	659	15.324	814	15.1029	693	0.016434	0.63732	up	[L]	Replication, recombination and repair	Molecular Function: chromatin binding (GO:0003682);; Cellular Component: nucleus (GO:0005634);; Molecular Function: methyltransferase activity (GO:0008168);; Biological Process: methylation (GO:0032259);;	--	--	--	--	C-5 cytosine-specific DNA methylase	DNA (cytosine-5)-methyltransferase 1 OS=Zea mays OX=4577 GN=MET2A PE=1 SV=1	--	--	DNA (cytosine-5)-methyltransferase 3 [Artemisia annua]	molecular function: binding (GO:0005488);; cellular component: cell (GO:0005623);; cellular component: organelle (GO:0043226);; cellular component: cell part (GO:0044464);; molecular function: catalytic activity (GO:0003824);; biological process: metabolic process (GO:0008152)
Chrysanthemum_x_morifolium_newGene_4064	--	9.50823	104	12.5347	157	10.2621	103	3.14195	33	3.26306	37	5.53217	52	0.000873505	-1.11681	down	--	--	--	--	--	--	--	--	--	--	--	--	--
evm.TU.scaffold_24.118	evm.TU.scaffold_24.118	5.30253	133	7.67159	223	4.70933	109	9.27738	216	11.413	285	9.72456	210	0.0339224	0.6744	up	--	--	Biological Process: protein transport (GO:0015031);;	--	--	--	--	Tic22-like family	Protein TIC 22, chloroplastic OS=Pisum sativum OX=3888 GN=TIC22 PE=1 SV=1	--	--	protein TIC 22 protein [Artemisia annua]	biological process: localization (GO:0051179)
evm.TU.scaffold_418.22	evm.TU.scaffold_418.22	65.243	847	48.0022	722	43.9566	525	79.1884	953	91.0869	1178	101.788	1137	0.00295001	0.715297	up	--	--	--	--	--	--	--	--	--	--	--	hypothetical protein CTI12_AA009040 [Artemisia annua]	--
evm.TU.scaffold_1333.486	evm.TU.scaffold_1333.486	56.0745	1381	56.983	1626	85.8571	1945	29.2344	667	29.695	729	28.8206	611	2.28e-08	-1.09122	down	[QV]	Secondary metabolites biosynthesis, transport and catabolism;; Defense mechanisms	Molecular Function: monooxygenase activity (GO:0004497);; Molecular Function: iron ion binding (GO:0005506);; Cellular Component: integral component of membrane (GO:0016021);; Molecular Function: oxidoreductase activity, acting on paired donors, with incorporation or reduction of molecular oxygen (GO:0016705);; Molecular Function: heme binding (GO:0020037);;	--	--	[Q]	Secondary metabolites biosynthesis, transport and catabolism	Cytochrome P450	Licodione synthase OS=Glycyrrhiza echinata OX=46348 GN=CYP93B1 PE=1 SV=2	--	--	flavone synthase II [Artemisia annua]	molecular function: catalytic activity (GO:0003824);; biological process: metabolic process (GO:0008152);; biological process: single-organism process (GO:0044699);; molecular function: binding (GO:0005488);; cellular component: membrane (GO:0016020);; cellular component: membrane part (GO:0044425)
evm.TU.scaffold_6299.62	evm.TU.scaffold_6299.62	36.8709	829	37.4163	974	30.758	636	20.9685	437	22.0788	494	17.9426	347	9.46e-05	-0.742291	down	--	--	Cellular Component: integral component of membrane (GO:0016021);;	--	--	--	--	Protein of unknown function (DUF1218)	--	--	--	hypothetical protein CTI12_AA517880 [Artemisia annua]	cellular component: membrane (GO:0016020);; cellular component: membrane part (GO:0044425)
evm.TU.scaffold_647.71	evm.TU.scaffold_647.71	6.38195	266	8.02759	388	9.71273	373	12.6553	489	14.279	593	11.8061	423	0.0112604	0.625674	up	--	--	Molecular Function: magnesium ion binding (GO:0000287);; Molecular Function: terpene synthase activity (GO:0010333);;	--	--	--	--	Terpene synthase family, metal binding domain	(E)-beta-farnesene synthase OS=Artemisia annua OX=35608 GN=CASC125 PE=1 SV=1	--	--	E-beta-farnesene synthase 2 [Artemisia annua]	molecular function: binding (GO:0005488);; molecular function: catalytic activity (GO:0003824)
Chrysanthemum_x_morifolium_newGene_70816	--	4.13887	78	5.36512	126	2.59761	49	1.35306	26	1.08582	22	1.67378	30	0.00866875	-1.06195	down	--	--	--	--	--	--	--	--	--	--	--	--	--
evm.TU.scaffold_360.110	evm.TU.scaffold_360.110	8.60512	90	7.54472	91	7.6101	73	16.8685	163	11.9402	124	13.1579	118	0.0371314	0.696727	up	--	--	Cellular Component: integral component of membrane (GO:0016021);;	--	--	--	--	--	--	--	--	hypothetical protein CTI12_AA399480 [Artemisia annua]	cellular component: membrane (GO:0016020);; cellular component: membrane part (GO:0044425)
evm.TU.scaffold_332.20	evm.TU.scaffold_332.20	4.88195	143	4.74057	161	3.68063	99	8.44115	229	8.87706	258	8.30531	209	0.000585442	0.842272	up	[G]	Carbohydrate transport and metabolism	Biological Process: glucose metabolic process (GO:0006006);; Molecular Function: oxidoreductase activity, acting on the aldehyde or oxo group of donors, NAD or NADP as acceptor (GO:0016620);; Molecular Function: NADP binding (GO:0050661);; Molecular Function: NAD binding (GO:0051287);;	--	--	[G]	Carbohydrate transport and metabolism	Glyceraldehyde 3-phosphate dehydrogenase, C-terminal domain	Glyceraldehyde-3-phosphate dehydrogenase GAPC2, cytosolic OS=Arabidopsis thaliana OX=3702 GN=GAPC2 PE=1 SV=1	--	--	glyceraldehyde-3-phosphate dehydrogenase [Chrysanthemum x morifolium]	biological process: metabolic process (GO:0008152);; biological process: single-organism process (GO:0044699);; molecular function: catalytic activity (GO:0003824);; molecular function: binding (GO:0005488)
evm.TU.scaffold_967.2	evm.TU.scaffold_967.2	0.133884	13	0.083969	9	0.259282	22	0.558764	48	0.497407	46	0.551963	44	0.014761	1.07415	up	[T]	Signal transduction mechanisms	Molecular Function: ATP binding (GO:0005524);; Cellular Component: integral component of membrane (GO:0016021);; Molecular Function: ATPase activity (GO:0016887);;	--	--	[Q]	Secondary metabolites biosynthesis, transport and catabolism	ABC-2 type transporter	Pleiotropic drug resistance protein 1 OS=Nicotiana tabacum OX=4097 GN=PDR1 PE=2 SV=1	--	--	PDR ABC-type transporter family protein [Artemisia annua]	molecular function: binding (GO:0005488);; cellular component: membrane (GO:0016020);; cellular component: membrane part (GO:0044425);; molecular function: catalytic activity (GO:0003824)
Chrysanthemum_x_morifolium_newGene_53157	--	64.6505	828	78.5603	1165	86.5994	1020	18.6527	222	14.9736	191	20.2907	224	7.88e-29	-1.93768	down	--	--	--	--	--	--	--	--	--	--	--	--	--
evm.TU.scaffold_10885.174	evm.TU.scaffold_10885.174	39.0866	543	53.3675	859	36.3863	465	83.854	1079	72.97	1009	70.7056	845	0.000456642	0.75316	up	[J]	Translation, ribosomal structure and biogenesis	Molecular Function: structural constituent of ribosome (GO:0003735);; Cellular Component: ribosome (GO:0005840);; Biological Process: translation (GO:0006412);;	--	--	[J]	Translation, ribosomal structure and biogenesis	Ribosomal protein L11, N-terminal domain	50S ribosomal protein L11, chloroplastic OS=Arabidopsis thaliana OX=3702 GN=RPL11 PE=2 SV=1	--	--	plastid ribosomal protein l11 [Artemisia annua]	molecular function: structural molecule activity (GO:0005198);; cellular component: cell (GO:0005623);; cellular component: macromolecular complex (GO:0032991);; cellular component: organelle (GO:0043226);; cellular component: cell part (GO:0044464);; biological process: metabolic process (GO:0008152);; biological process: cellular process (GO:0009987)
evm.TU.scaffold_6083.239	evm.TU.scaffold_6083.239	0.188484	18	0.248376	28	0.191362	17	0.744434	66	0.916615	87	0.633165	52	0.000151185	1.34275	up	--	--	Biological Process: response to acid chemical (GO:0001101);; Biological Process: biological_process (GO:0008150);; Biological Process: response to endogenous stimulus (GO:0009719);; Biological Process: response to hormone (GO:0009725);; Biological Process: response to abscisic acid (GO:0009737);; Biological Process: response to organic substance (GO:0010033);; Biological Process: response to lipi…	--	--	[R]	General function prediction only	Tetratricopeptide repeat	Protein TSS OS=Arabidopsis thaliana OX=3702 GN=TSS PE=1 SV=1	--	--	tetratricopeptide repeat (TPR)-like superfamily protein [Artemisia annua]	biological process: response to stimulus (GO:0050896)
evm.TU.scaffold_1046.569	evm.TU.scaffold_1046.569	21.5109	282	18.5523	281	19.9999	241	12.9215	157	13.9955	183	9.59843	108	0.02443	-0.643565	down	--	--	Molecular Function: calcium ion binding (GO:0005509);;	--	--	[ZD]	Cytoskeleton;; Cell cycle control, cell division, chromosome partitioning	EF-hand domain pair	Calcium-binding protein KIC OS=Arabidopsis thaliana OX=3702 GN=KIC PE=1 SV=2	--	--	EF-hand domain pair [Artemisia annua]	molecular function: binding (GO:0005488)
Chrysanthemum_x_morifolium_newGene_15664	--	1.61021	17	4.16183	51	4.00674	39	0.852527	9	0.802854	9	0.926427	9	0.0469931	-0.962463	down	--	--	Cellular Component: cytoskeleton (GO:0005856);;	K16803|5.8458e-08|mus:103974309|K16803 cytoskeleton-associated protein 5 | (RefSeq) protein MOR1-like isoform X1	--	[QR]	Secondary metabolites biosynthesis, transport and catabolism;; General function prediction only	--	Protein MOR1 OS=Oryza sativa subsp. japonica OX=39947 GN=MOR1 PE=2 SV=1	S	Function unknown	gibberellin 2-oxidase1 [Helianthus annuus]	cellular component: cell (GO:0005623);; cellular component: organelle (GO:0043226);; cellular component: cell part (GO:0044464)
evm.TU.scaffold_250.52	evm.TU.scaffold_250.52	4.26694	113	5.52812	170	3.51027	86	8.65107	212	6.94039	183	8.15419	186	0.0223532	0.713817	up	[J]	Translation, ribosomal structure and biogenesis	Molecular Function: RNA methyltransferase activity (GO:0008173);; Biological Process: tRNA methylation (GO:0030488);; Molecular Function: iron-sulfur cluster binding (GO:0051536);; Biological Process: rRNA base methylation (GO:0070475);;	--	--	--	--	Radical SAM superfamily	--	--	--	probable dual-specificity RNA methyltransferase RlmN [Helianthus annuus]	molecular function: catalytic activity (GO:0003824);; biological process: metabolic process (GO:0008152);; biological process: cellular process (GO:0009987);; molecular function: binding (GO:0005488);; biological process: cellular component organization or biogenesis (GO:0071840)
evm.TU.scaffold_311.162	evm.TU.scaffold_311.162	4.42991	118	5.46401	168	6.3873	156	9.36324	231	7.13948	189	11.0276	252	0.041929	0.65785	up	--	--	Molecular Function: transferase activity, transferring acyl groups other than amino-acyl groups (GO:0016747);;	--	--	--	--	Transferase family	Pelargonidin 3-O-(6-caffeoylglucoside) 5-O-(6-O-malonylglucoside) 4'''-malonyltransferase OS=Salvia splendens OX=180675 PE=1 SV=1	--	--	transferase, Chloramphenicol acetyltransferase-like domain protein [Artemisia annua]	molecular function: catalytic activity (GO:0003824)
evm.TU.scaffold_1056.55	evm.TU.scaffold_1056.55	11.4995	175	13.4066	236	10.2147	143	25.8741	364	15.6658	237	21.2993	279	0.0154325	0.726561	up	--	--	Cellular Component: photosystem I (GO:0009522);; Cellular Component: photosystem II (GO:0009523);; Cellular Component: chloroplast thylakoid membrane (GO:0009535);; Biological Process: photosynthesis, light harvesting (GO:0009765);; Cellular Component: integral component of membrane (GO:0016021);; Molecular Function: chlorophyll binding (GO:0016168);; Biological Process: protein-chromophore linka…	--	--	--	--	Chlorophyll A-B binding protein	Chlorophyll a-b binding protein 6A, chloroplastic OS=Solanum lycopersicum OX=4081 GN=CAB6A PE=2 SV=1	--	--	Chlorophyll A-B binding protein [Artemisia annua]	cellular component: cell (GO:0005623);; cellular component: membrane (GO:0016020);; cellular component: macromolecular complex (GO:0032991);; cellular component: membrane part (GO:0044425);; cellular component: cell part (GO:0044464);; cellular component: organelle (GO:0043226);; cellular component: organelle part (GO:0044422);; biological process: metabolic process (GO:0008152);; biological proc…
Chrysanthemum_x_morifolium_newGene_1311	--	3.83741	121	4.46729	163	5.64069	164	1.54596	46	1.97805	62	1.56515	43	3.9e-05	-1.20095	down	--	--	--	--	--	--	--	--	Putative F-box/LRR-repeat protein At3g28410 OS=Arabidopsis thaliana OX=3702 GN=At3g28410 PE=4 SV=2	S	Function unknown	putative FBD-associated F-box protein At5g38570 [Helianthus annuus]	--
Chrysanthemum_x_morifolium_newGene_70760	--	12.6524	227	14.7567	306	12.0863	193	5.75185	92	1.62258	30	1.06665	17	0.000189368	-1.43416	down	--	--	--	--	--	--	--	--	--	--	--	--	--
evm.TU.scaffold_506.195	evm.TU.scaffold_506.195	0.526915	17	0.144423	6	0.130873	4	1.81927	53	2.15876	68	1.65091	45	0.000120055	1.51639	up	[IQ]	Lipid transport and metabolism;; Secondary metabolites biosynthesis, transport and catabolism	Molecular Function: transferase activity (GO:0016740);;	--	--	[IQ]	Lipid transport and metabolism;; Secondary metabolites biosynthesis, transport and catabolism	Beta-ketoacyl synthase, N-terminal domain	3-oxoacyl-[acyl-carrier-protein] synthase I, chloroplastic OS=Arabidopsis thaliana OX=3702 GN=KAS1 PE=1 SV=2	--	--	plastid 3-keto-acyl-ACP synthase I [Artemisia annua]	molecular function: catalytic activity (GO:0003824)
evm.TU.scaffold_9796.9	evm.TU.scaffold_9796.9	0.746004	28	1.09722	48	0.799342	28	2.17977	75	2.90045	108	1.31934	43	0.0409864	0.891213	up	[QV]	Secondary metabolites biosynthesis, transport and catabolism;; Defense mechanisms	Molecular Function: monooxygenase activity (GO:0004497);; Molecular Function: iron ion binding (GO:0005506);; Molecular Function: oxidoreductase activity, acting on paired donors, with incorporation or reduction of molecular oxygen (GO:0016705);; Molecular Function: heme binding (GO:0020037);;	--	--	[Q]	Secondary metabolites biosynthesis, transport and catabolism	Cytochrome P450	Cytochrome P450 77A3 OS=Glycine max OX=3847 GN=CYP77A3 PE=2 SV=1	--	--	cytochrome P450 77A1 [Artemisia annua]	molecular function: catalytic activity (GO:0003824);; biological process: metabolic process (GO:0008152);; biological process: single-organism process (GO:0044699);; molecular function: binding (GO:0005488)
Chrysanthemum_x_morifolium_newGene_3985	--	2.84846	51	1.89294	39	1.13123	19	0.327787	6	0.414044	8	0.616966	10	0.0250817	-1.04275	down	--	--	--	--	--	--	--	--	--	S	Function unknown	hypothetical protein LSAT_8X161261 [Lactuca sativa]	--
evm.TU.scaffold_924.153	evm.TU.scaffold_924.153	14.7697	355	16.1745	451	18.7968	416	9.222	206	11.5677	277	9.49038	197	0.00433417	-0.65986	down	--	--	Molecular Function: transcription coactivator activity (GO:0003713);;	--	--	[K]	Transcription	SSXT protein (N-terminal region)	GRF1-interacting factor 1 OS=Arabidopsis thaliana OX=3702 GN=GIF1 PE=1 SV=1	--	--	SSXT-like protein [Artemisia annua]	molecular function: transcription factor activity, protein binding (GO:0000988);; biological process: biological regulation (GO:0065007)
Chrysanthemum_x_morifolium_newGene_35829	--	9.91749	83	46.3442	446	42.7723	327	3.04553	24	6.09326	51	3.80921	28	9.79e-07	-1.7849	down	--	--	--	--	--	--	--	--	--	--	--	--	--
evm.TU.scaffold_499.472	evm.TU.scaffold_499.472	34.4877	1542	46.7041	2419	37.056	1524	65.8308	2727	79.2573	3528	75.8614	2917	6.02e-07	0.849153	up	[O]	Posttranslational modification, protein turnover, chaperones	Molecular Function: ATP binding (GO:0005524);; Biological Process: protein refolding (GO:0042026);;	--	--	[O]	Posttranslational modification, protein turnover, chaperones	TCP-1/cpn60 chaperonin family	RuBisCO large subunit-binding protein subunit beta, chloroplastic OS=Pisum sativum OX=3888 PE=1 SV=2	--	--	chaperonin 60 beta [Artemisia annua]	molecular function: binding (GO:0005488);; biological process: cellular process (GO:0009987)
evm.TU.scaffold_138.97	evm.TU.scaffold_138.97	53.1468	969	48.1388	1017	39.9286	670	26.8646	454	30.9848	563	29.0551	456	0.001282	-0.661754	down	--	--	Cellular Component: nucleus (GO:0005634);; Biological Process: regulation of transcription, DNA-templated (GO:0006355);; Biological Process: auxin-activated signaling pathway (GO:0009734);;	--	--	--	--	AUX/IAA family	Auxin-responsive protein IAA16 OS=Arabidopsis thaliana OX=3702 GN=IAA16 PE=1 SV=1	--	--	auxin-induced protein AUX28 [Artemisia annua]	cellular component: cell (GO:0005623);; cellular component: organelle (GO:0043226);; cellular component: cell part (GO:0044464);; biological process: biological regulation (GO:0065007);; biological process: cellular process (GO:0009987);; biological process: signaling (GO:0023052);; biological process: single-organism process (GO:0044699);; biological process: response to stimulus (GO:0050896)
Chrysanthemum_x_morifolium_newGene_3064	--	0.945357	21	0.388742	10	0.582432	12	3.39739	68	1.97201	43	2.12072	40	0.00555647	1.17625	up	--	--	Molecular Function: transcription factor activity, sequence-specific DNA binding (GO:0003700);; Cellular Component: nucleus (GO:0005634);; Molecular Function: zinc ion binding (GO:0008270);; Biological Process: red, far-red light phototransduction (GO:0009585);; Biological Process: response to far red light (GO:0010218);; Biological Process: positive regulation of circadian rhythm (GO:0042753);; …	--	--	--	--	--	Protein FAR-RED ELONGATED HYPOCOTYL 3 OS=Arabidopsis thaliana OX=3702 GN=FHY3 PE=1 SV=1	S	Function unknown	protein FAR-RED ELONGATED HYPOCOTYL 3 isoform X1 [Helianthus annuus]	molecular function: nucleic acid binding transcription factor activity (GO:0001071);; biological process: biological regulation (GO:0065007);; cellular component: cell (GO:0005623);; cellular component: organelle (GO:0043226);; cellular component: cell part (GO:0044464);; molecular function: binding (GO:0005488);; biological process: cellular process (GO:0009987);; biological process: signaling (…
evm.TU.scaffold_1414.108	evm.TU.scaffold_1414.108	2.93373	87	1.99586	68	2.11977	58	6.75285	184	3.86456	114	4.82543	122	0.0124437	0.894968	up	--	--	--	--	--	--	--	Protein of unknown function (DUF1644)	--	--	--	hypothetical protein CTI12_AA126650 [Artemisia annua]	--
evm.TU.scaffold_733.108	evm.TU.scaffold_733.108	334.417	8098	307.113	8613	146.093	3254	158.429	3555	117.621	2836	126.9	2643	0.00979309	-0.828674	down	--	--	--	--	--	--	--	Protein of unknown function (DUF642)	--	--	--	hypothetical protein CTI12_AA492350 [Artemisia annua]	--
Chrysanthemum_x_morifolium_newGene_11293	--	1.28036	61	1.19636	66	2.16783	87	2.7881	120	4.94612	234	2.87716	111	0.0124418	0.942222	up	--	--	--	--	--	[J]	Translation, ribosomal structure and biogenesis	Zinc knuckle;; Zinc knuckle	Cold shock protein 1 OS=Arabidopsis thaliana OX=3702 GN=CSP1 PE=1 SV=1	L	Replication, recombination and repair	uncharacterized protein LOC110895146 isoform X1 [Helianthus annuus]	--
evm.TU.scaffold_1736.85	evm.TU.scaffold_1736.85	7.2894	167	3.97213	105	2.074	44	1.59552	34	0.917848	21	0.830089	17	0.00419643	-1.20691	down	[Q]	Secondary metabolites biosynthesis, transport and catabolism	Molecular Function: oxidoreductase activity (GO:0016491);; Molecular Function: metal ion binding (GO:0046872);;	--	--	--	--	non-haem dioxygenase in morphine synthesis N-terminal	--	--	--	2-oxoglutarate (2OG) and Fe(II)-dependent oxygenase superfamily protein [Artemisia annua]	molecular function: catalytic activity (GO:0003824);; molecular function: binding (GO:0005488)
evm.TU.scaffold_1554.367	evm.TU.scaffold_1554.367	3.26872	86	3.9651	121	3.37486	82	5.80606	141	6.31795	165	9.64335	217	0.00789038	0.858391	up	--	--	Molecular Function: DNA binding (GO:0003677);; Molecular Function: transcription factor activity, sequence-specific DNA binding (GO:0003700);; Cellular Component: nucleus (GO:0005634);;	--	--	--	--	AP2 domain	Ethylene-responsive transcription factor CRF2 OS=Arabidopsis thaliana OX=3702 GN=CRF2 PE=1 SV=1	--	--	AP2/ERF transcription factor ERF/PTI6 [Artemisia annua]	molecular function: binding (GO:0005488);; molecular function: nucleic acid binding transcription factor activity (GO:0001071);; biological process: biological regulation (GO:0065007);; cellular component: cell (GO:0005623);; cellular component: organelle (GO:0043226);; cellular component: cell part (GO:0044464)
evm.TU.scaffold_826.68	evm.TU.scaffold_826.68	12.1462	179	9.07903	155	12.0127	163	7.28594	100	6.56208	97	5.68224	72	0.0471186	-0.660657	down	--	--	Molecular Function: DNA binding (GO:0003677);; Molecular Function: transcription factor activity, sequence-specific DNA binding (GO:0003700);; Cellular Component: nucleus (GO:0005634);;	--	--	--	--	AP2 domain	Ethylene-responsive transcription factor ERF008 OS=Arabidopsis thaliana OX=3702 GN=ERF008 PE=2 SV=1	--	--	ethylene response factor DREB3-2 [Chrysanthemum indicum]	molecular function: binding (GO:0005488);; molecular function: nucleic acid binding transcription factor activity (GO:0001071);; biological process: biological regulation (GO:0065007);; cellular component: cell (GO:0005623);; cellular component: organelle (GO:0043226);; cellular component: cell part (GO:0044464)
evm.TU.scaffold_1042.282	evm.TU.scaffold_1042.282	4.26161	69	2.05253	39	2.99939	45	11.5487	174	4.7355	77	8.13167	114	0.0200477	0.975208	up	--	--	Biological Process: response to light stimulus (GO:0009416);; Cellular Component: photosystem I (GO:0009522);; Cellular Component: photosystem II (GO:0009523);; Cellular Component: chloroplast thylakoid membrane (GO:0009535);; Biological Process: photosynthesis, light harvesting in photosystem I (GO:0009768);; Cellular Component: chloroplast envelope (GO:0009941);; Cellular Component: plastoglobu…	--	--	--	--	Chlorophyll A-B binding protein	Chlorophyll a-b binding protein 16, chloroplastic OS=Nicotiana tabacum OX=4097 GN=CAB16 PE=2 SV=1	--	--	chlorophyll a-b binding protein of LHCII type 1 [Helianthus annuus]	biological process: response to stimulus (GO:0050896);; cellular component: cell (GO:0005623);; cellular component: membrane (GO:0016020);; cellular component: macromolecular complex (GO:0032991);; cellular component: membrane part (GO:0044425);; cellular component: cell part (GO:0044464);; cellular component: organelle (GO:0043226);; cellular component: organelle part (GO:0044422);; biological p…
evm.TU.scaffold_11728.10	evm.TU.scaffold_11728.10	0.411314	11	0.926886	28	0.345157	9	6.21939	149	6.68717	172	5.30741	118	6.3e-17	2.47996	up	[G]	Carbohydrate transport and metabolism	Molecular Function: chitinase activity (GO:0004568);; Biological Process: carbohydrate metabolic process (GO:0005975);; Biological Process: chitin catabolic process (GO:0006032);; Molecular Function: chitin binding (GO:0008061);; Biological Process: cell wall macromolecule catabolic process (GO:0016998);;	--	--	[R]	General function prediction only	Chitinase class I	Endochitinase OS=Pisum sativum OX=3888 PE=2 SV=1	--	--	endochitinase [Artemisia annua]	molecular function: catalytic activity (GO:0003824);; biological process: metabolic process (GO:0008152);; molecular function: binding (GO:0005488);; biological process: cellular process (GO:0009987)
evm.TU.scaffold_194.281	evm.TU.scaffold_194.281	1.28328	20	1.9154	34	1.88769	26	0.109202	2	0.310386	5	0	0	0.00352471	-1.23953	down	--	--	Biological Process: reproduction (GO:0000003);; Biological Process: developmental process involved in reproduction (GO:0003006);; Cellular Component: cellular_component (GO:0005575);; Cellular Component: intracellular (GO:0005622);; Cellular Component: cell (GO:0005623);; Cellular Component: nucleus (GO:0005634);; Cellular Component: cytoplasm (GO:0005737);; Biological Process: multicellular orga…	--	--	[R]	General function prediction only	Phosphatidylethanolamine-binding protein	CEN-like protein 2 OS=Nicotiana tabacum OX=4097 GN=CET2 PE=2 SV=1	--	--	terminal flower1-like protein [Chrysanthemum seticuspe f. boreale]	biological process: reproduction (GO:0000003);; biological process: reproductive process (GO:0022414);; biological process: developmental process (GO:0032502);; cellular component: cell (GO:0005623);; cellular component: cell part (GO:0044464);; cellular component: organelle (GO:0043226);; biological process: multicellular organismal process (GO:0032501);; biological process: single-organism proc…
evm.TU.scaffold_362.5	evm.TU.scaffold_362.5	15.6545	140	19.253	199	23.8209	195	8.84005	73	10.5215	94	12.9705	100	0.0304518	-0.729022	down	--	--	--	--	--	[A]	RNA processing and modification	--	--	--	--	hypothetical protein CTI12_AA501420 [Artemisia annua]	--
evm.TU.scaffold_1403.11	evm.TU.scaffold_1403.11	1755.37	19646	1585.08	20546	1043.72	10744	683.943	7092	767.854	8556	505.915	4870	1.3e-05	-1.04661	down	--	--	Molecular Function: cysteine-type endopeptidase inhibitor activity (GO:0004869);;	--	--	--	--	Aspartic acid proteinase inhibitor	--	--	--	proteinase inhibitor I25 [Artemisia annua]	molecular function: molecular function regulator (GO:0098772);; biological process: biological regulation (GO:0065007)
evm.TU.scaffold_468.364	evm.TU.scaffold_468.364	0.500961	29	0.786273	53	0.66148	35	2.09333	112	0.960546	55	1.59432	79	0.0374239	0.892028	up	--	--	Molecular Function: oxidoreductase activity, acting on single donors with incorporation of molecular oxygen, incorporation of two atoms of oxygen (GO:0016702);; Biological Process: oxylipin biosynthetic process (GO:0031408);; Molecular Function: metal ion binding (GO:0046872);;	--	--	--	--	Lipoxygenase	Linoleate 13S-lipoxygenase 2-1, chloroplastic OS=Solanum tuberosum OX=4113 GN=LOX2.1 PE=1 SV=1	--	--	lipoxygenase 7 protein [Artemisia annua]	molecular function: catalytic activity (GO:0003824);; biological process: metabolic process (GO:0008152);; biological process: single-organism process (GO:0044699);; biological process: cellular process (GO:0009987);; molecular function: binding (GO:0005488)
evm.TU.scaffold_11284.1	evm.TU.scaffold_11284.1	0.309408	5	0.872235	15	0.840987	11	2.36882	31	2.59692	37	4.82448	59	0.00465019	1.21838	up	--	--	--	--	--	--	--	Pollen protein Ole e 1 like	Phylloplanin OS=Nicotiana tabacum OX=4097 PE=1 SV=1	--	--	pollen Ole e 1 allergen and extensin family protein [Artemisia annua]	--
evm.TU.scaffold_1451.67	evm.TU.scaffold_1451.67	9.79226	316	10.8572	406	9.37456	278	7.16424	214	5.91557	190	5.95774	166	0.00950878	-0.612334	down	--	--	Cellular Component: integral component of membrane (GO:0016021);;	--	--	[E]	Amino acid transport and metabolism	Transmembrane amino acid transporter protein	Lysine histidine transporter-like 8 OS=Arabidopsis thaliana OX=3702 GN=AATL1 PE=1 SV=1	--	--	amino acid transporter, transmembrane domain-containing protein [Artemisia annua]	cellular component: membrane (GO:0016020);; cellular component: membrane part (GO:0044425)
evm.TU.scaffold_915.13	evm.TU.scaffold_915.13	4.2745	137	4.44489	165	3.95917	117	6.25426	185	7.87397	250	6.36702	175	0.0297414	0.612907	up	--	--	Cellular Component: ribosome (GO:0005840);;	--	--	[S]	Function unknown	Ribosomal protein L1p/L10e family	--	--	--	Ribosomal protein L1 [Artemisia annua]	cellular component: cell (GO:0005623);; cellular component: macromolecular complex (GO:0032991);; cellular component: organelle (GO:0043226);; cellular component: cell part (GO:0044464)
Chrysanthemum_x_morifolium_newGene_49565	--	106.718	1161	112.956	1355	110.249	1054	66.2071	640	69.7136	699	71.3641	651	6.65e-07	-0.675749	down	--	--	--	--	--	--	--	--	--	--	--	--	--
Chrysanthemum_x_morifolium_newGene_44657	--	3.28004	96	4.59029	144	5.19076	107	0.896139	26	1.01793	28	2.51095	52	0.00205987	-1.14074	down	--	--	--	--	--	--	--	--	Coatomer subunit gamma-2 OS=Oryza sativa subsp. japonica OX=39947 GN=Os07g0201100 PE=2 SV=1	--	--	--	--
Chrysanthemum_x_morifolium_newGene_2848	--	12.9203	102	8.43934	77	16.0234	116	4.14164	30	7.38896	58	3.49871	24	0.0305276	-0.926252	down	[M]	Cell wall/membrane/envelope biogenesis	Cellular Component: integral component of membrane (GO:0016021);;	--	--	--	--	--	EG45-like domain containing protein OS=Citrus jambhiri OX=64884 GN=CjBAp12 PE=1 SV=1	S	Function unknown	hypothetical protein LSAT_7X52380 [Lactuca sativa]	cellular component: membrane (GO:0016020);; cellular component: membrane part (GO:0044425)
Chrysanthemum_x_morifolium_newGene_21512	--	13.5918	194	14.1742	234	9.2938	122	5.93026	79	3.66384	52	4.54625	56	0.000257597	-1.1401	down	--	--	--	K01166|3.06555e-16|mtr:MTR_1g048200|K01166 ribonuclease T2 [EC:3.1.27.1] | (RefSeq) ribonuclease T2 family protein	--	[A]	RNA processing and modification	Ribonuclease T2 family	Ribonuclease MC OS=Momordica charantia OX=3673 PE=1 SV=1	S	Function unknown	hypothetical protein AQUCO_00500045v1 [Aquilegia coerulea]	--
evm.TU.scaffold_1527.216	evm.TU.scaffold_1527.216	0.159335	8	0.173623	10	0.210611	10	0.546281	25	0.543197	27	0.713958	30	0.04486	0.959671	up	[M]	Cell wall/membrane/envelope biogenesis	Cellular Component: outer membrane (GO:0019867);;	--	--	--	--	Omp85 superfamily domain	Protein TOC75-3, chloroplastic OS=Arabidopsis thaliana OX=3702 GN=TOC75-3 PE=1 SV=1	--	--	protein TOC75-3, chloroplastic [Artemisia annua]	cellular component: membrane (GO:0016020)
evm.TU.scaffold_5723.236	evm.TU.scaffold_5723.236	29.1047	626	28.6739	714	23.4951	465	116.466	2318	66.3797	1420	64.8831	1199	2.7e-09	1.40536	up	--	--	Cellular Component: photosystem I (GO:0009522);; Cellular Component: photosystem II (GO:0009523);; Cellular Component: chloroplast thylakoid membrane (GO:0009535);; Biological Process: photosynthesis, light harvesting (GO:0009765);; Cellular Component: integral component of membrane (GO:0016021);; Molecular Function: chlorophyll binding (GO:0016168);; Biological Process: protein-chromophore linka…	--	--	--	--	Chlorophyll A-B binding protein	Chlorophyll a-b binding protein 3C, chloroplastic OS=Solanum lycopersicum OX=4081 GN=CAB3C PE=3 SV=1	--	--	Chlorophyll A-B binding protein [Artemisia annua]	cellular component: cell (GO:0005623);; cellular component: membrane (GO:0016020);; cellular component: macromolecular complex (GO:0032991);; cellular component: membrane part (GO:0044425);; cellular component: cell part (GO:0044464);; cellular component: organelle (GO:0043226);; cellular component: organelle part (GO:0044422);; biological process: metabolic process (GO:0008152);; biological proc…
Chrysanthemum_x_morifolium_newGene_40933	--	3.04218	53	5.51602	79	10.0669	118	2.48659	40	1.70891	30	1.70484	18	0.0426027	-0.923933	down	--	--	--	--	--	--	--	GRAM domain	Putative GEM-like protein 8 OS=Arabidopsis thaliana OX=3702 GN=At5g23370 PE=3 SV=1	S	Function unknown	GEM-like protein 7 [Lactuca sativa]	--
evm.TU.scaffold_1189.197	evm.TU.scaffold_1189.197	18.4676	393	20.446	503	18.3965	360	41.3055	813	27.6367	585	34.5163	631	0.000283526	0.780415	up	[H]	Coenzyme transport and metabolism	Molecular Function: methyltransferase activity (GO:0008168);; Cellular Component: integral component of membrane (GO:0016021);; Biological Process: methylation (GO:0032259);;	--	--	[H]	Coenzyme transport and metabolism	Methyltransferase domain	2-methyl-6-phytyl-1,4-hydroquinone methyltransferase, chloroplastic OS=Spinacia oleracea OX=3562 PE=1 SV=1	--	--	2-methyl-6-phytyl-1,4-hydroquinone methyltransferase, chloroplastic-like [Cynara cardunculus var. scolymus]	molecular function: catalytic activity (GO:0003824);; cellular component: membrane (GO:0016020);; cellular component: membrane part (GO:0044425);; biological process: metabolic process (GO:0008152)
evm.TU.scaffold_538.12	evm.TU.scaffold_538.12	20.5693	389	20.359	445	28.9218	502	10.4327	183	11.0619	208	12.2471	199	2.33e-05	-0.95383	down	[G]	Carbohydrate transport and metabolism	Molecular Function: channel activity (GO:0015267);; Cellular Component: integral component of membrane (GO:0016021);;	--	--	[G]	Carbohydrate transport and metabolism	Major intrinsic protein	Probable aquaporin PIP2-8 OS=Arabidopsis thaliana OX=3702 GN=PIP2-8 PE=1 SV=1	--	--	Aquaporin-like protein [Artemisia annua]	molecular function: transporter activity (GO:0005215);; biological process: localization (GO:0051179);; cellular component: membrane (GO:0016020);; cellular component: membrane part (GO:0044425)
Chrysanthemum_x_morifolium_newGene_5376	--	5.60678	67	1.55062	24	6.50687	71	0.84877	11	0.147002	2	0.478742	6	0.00207401	-1.30427	down	--	--	--	K12160|1.83661e-14|obr:102703738|K12160 small ubiquitin-related modifier | (RefSeq) small ubiquitin-related modifier 1	RNA transport (ko03013)	[O]	Posttranslational modification, protein turnover, chaperones	--	Small ubiquitin-related modifier 1 OS=Oryza sativa subsp. japonica OX=39947 GN=SUMO1 PE=1 SV=1	O	Posttranslational modification, protein turnover, chaperones	PREDICTED: small ubiquitin-related modifier 1-like [Ipomoea nil]	--
Chrysanthemum_x_morifolium_newGene_33548	--	6.74308	100	7.76253	133	8.81239	120	4.67245	65	3.13674	47	4.34234	56	0.0316083	-0.766261	down	--	--	--	--	--	--	--	--	--	--	--	--	--
evm.TU.scaffold_1250.9	evm.TU.scaffold_1250.9	12.4668	377	10.3548	362	8.30215	231	5.56564	156	4.45593	134	5.32264	139	0.000557856	-0.908745	down	[I]	Lipid transport and metabolism	Biological Process: lipid metabolic process (GO:0006629);;	--	--	[I]	Lipid transport and metabolism	Lipase (class 3)	Triacylglycerol lipase OBL1 OS=Nicotiana tabacum OX=4097 GN=OBL1 PE=1 SV=1	--	--	triacylglycerol lipase-like 1 [Artemisia annua]	biological process: metabolic process (GO:0008152);; biological process: single-organism process (GO:0044699)
evm.TU.scaffold_5811.69	evm.TU.scaffold_5811.69	4.50216	193	3.93646	195	4.52023	178	2.2578	90	2.10191	90	2.84635	105	0.00941714	-0.747853	down	--	--	Molecular Function: protein binding (GO:0005515);;	--	--	--	--	Protein of unknown function (DUF4005)	Protein IQ-DOMAIN 14 OS=Arabidopsis thaliana OX=3702 GN=IQD14 PE=1 SV=1	--	--	IQ-domain 13 [Artemisia annua]	molecular function: binding (GO:0005488)
evm.TU.scaffold_914.40	evm.TU.scaffold_914.40	3.47875	162	4.4496	240	5.1883	222	5.92905	255	8.18146	379	8.05729	322	0.0197755	0.671197	up	--	--	--	--	--	--	--	Domain of unknown function (DUF4378)	--	--	--	DUF3741-associated sequence motif protein [Artemisia annua]	--
evm.TU.scaffold_663.18	evm.TU.scaffold_663.18	23.0777	573	26.8577	772	19.0757	436	44.5921	1026	43.887	1085	39.5354	844	1.09e-05	0.828151	up	[J]	Translation, ribosomal structure and biogenesis	Molecular Function: structural constituent of ribosome (GO:0003735);; Biological Process: translation (GO:0006412);; Cellular Component: large ribosomal subunit (GO:0015934);;	--	--	[J]	Translation, ribosomal structure and biogenesis	Ribosomal proteins 50S-L15, 50S-L18e, 60S-L27A	50S ribosomal protein L15, chloroplastic OS=Spinacia oleracea OX=3562 GN=RPL15 PE=1 SV=3	--	--	Ribosomal protein L15, bacterial-type [Artemisia annua]	molecular function: structural molecule activity (GO:0005198);; biological process: metabolic process (GO:0008152);; biological process: cellular process (GO:0009987);; cellular component: cell (GO:0005623);; cellular component: macromolecular complex (GO:0032991);; cellular component: organelle (GO:0043226);; cellular component: organelle part (GO:0044422);; cellular component: cell part (GO:004…
Chrysanthemum_x_morifolium_newGene_58506	--	36.7628	513	22.8324	369	17.7702	228	11.9178	154	11.7064	163	10.1092	122	0.00158809	-0.999859	down	--	--	Biological Process: lipid transport (GO:0006869);; Molecular Function: lipid binding (GO:0008289);;	--	--	--	--	--	Non-specific lipid-transfer protein OS=Helianthus annuus OX=4232 PE=3 SV=1	U	Intracellular trafficking, secretion, and vesicular transport	lipid transfer protein-4 [Artemisia annua]	biological process: single-organism process (GO:0044699);; biological process: localization (GO:0051179);; molecular function: binding (GO:0005488)
Chrysanthemum_x_morifolium_newGene_81244	--	11.5183	175	5.2682	95	12.1438	184	3.35907	47	3.90353	68	3.60709	54	0.0109701	-0.992054	down	--	--	Biological Process: cellular macromolecule metabolic process (GO:0044260);; Biological Process: nucleic acid metabolic process (GO:0090304);;	K09272|2.55959e-58|csv:101222581|K09272 structure-specific recognition protein 1 | (RefSeq) FACT complex subunit SSRP1	--	[KLB]	Transcription;; Replication, recombination and repair;; Chromatin structure and dynamics	Histone chaperone Rttp106-like	FACT complex subunit SSRP1 OS=Catharanthus roseus OX=4058 GN=SSRP1 PE=2 SV=1	B	Chromatin structure and dynamics	FACT complex subunit SSRP1-like isoform X1 [Lactuca sativa]	biological process: metabolic process (GO:0008152);; biological process: cellular process (GO:0009987)
evm.TU.scaffold_987.217	evm.TU.scaffold_987.217	59.5795	811	55.4568	874	53.9035	675	45.8025	578	34.3881	466	25.0906	294	0.0341607	-0.616042	down	--	--	--	--	--	--	--	cAMP-regulated phosphoprotein/endosulfine conserved region	--	--	--	endosulphine [Artemisia annua]	--
evm.TU.scaffold_396.459	evm.TU.scaffold_396.459	91.197	2792	85.6544	3037	65.0519	1832	59.9827	1702	40.8269	1245	48.1284	1268	0.00786525	-0.649027	down	[G]	Carbohydrate transport and metabolism	Molecular Function: pectate lyase activity (GO:0030570);; Biological Process: pectin catabolic process (GO:0045490);; Molecular Function: metal ion binding (GO:0046872);;	--	--	--	--	Pectate lyase	Probable pectate lyase 5 OS=Arabidopsis thaliana OX=3702 GN=At1g67750 PE=2 SV=2	--	--	pectin lyase fold/virulence factor, AmbAllergen [Artemisia annua]	molecular function: catalytic activity (GO:0003824);; biological process: metabolic process (GO:0008152);; molecular function: binding (GO:0005488)
evm.TU.scaffold_931.83	evm.TU.scaffold_931.83	3.16571	300	3.72674	408	3.6156	315	1.88551	166	1.67006	158	1.71397	140	3.52e-06	-0.922616	down	[V]	Defense mechanisms	Molecular Function: ATP binding (GO:0005524);; Cellular Component: membrane (GO:0016020);; Cellular Component: integral component of membrane (GO:0016021);; Molecular Function: ATPase activity (GO:0016887);; Molecular Function: ATPase activity, coupled to transmembrane movement of substances (GO:0042626);; Biological Process: transmembrane transport (GO:0055085);;	--	--	[Q]	Secondary metabolites biosynthesis, transport and catabolism	ABC transporter transmembrane region	ABC transporter C family member 13 OS=Arabidopsis thaliana OX=3702 GN=ABCC13 PE=2 SV=3	--	--	ABC transporter C family member 13 [Helianthus annuus]	molecular function: binding (GO:0005488);; cellular component: membrane (GO:0016020);; cellular component: membrane part (GO:0044425);; molecular function: catalytic activity (GO:0003824);; molecular function: transporter activity (GO:0005215);; biological process: localization (GO:0051179)
evm.TU.scaffold_asm16_new.6485	evm.TU.scaffold_asm16_new.6485	1.46638	127	1.58917	159	1.63162	130	2.79552	224	2.08093	179	2.66758	198	0.0351392	0.608709	up	--	--	--	--	--	--	--	--	Protein CHUP1, chloroplastic OS=Arabidopsis thaliana OX=3702 GN=CHUP1 PE=1 SV=1	--	--	hypothetical protein CTI12_AA573810 [Artemisia annua]	--
Chrysanthemum_x_morifolium_newGene_95563	--	1.31809	82	1.67953	119	2.34951	136	3.60103	200	5.3663	326	3.29145	177	0.00284152	0.969098	up	--	--	--	--	--	--	--	Putative S-adenosyl-L-methionine-dependent methyltransferase	Uncharacterized membrane protein At3g27390 OS=Arabidopsis thaliana OX=3702 GN=At3g27390 PE=1 SV=2	S	Function unknown	uncharacterized membrane protein At3g27390 isoform X1 [Helianthus annuus]	--
Chrysanthemum_x_morifolium_newGene_82631	--	2.69884	48	1.91189	41	8.02978	128	0.254082	5	0.407665	8	1.33084	22	0.0111926	-1.13719	down	[W]	Extracellular structures	Molecular Function: protein serine/threonine kinase activity (GO:0004674);; Molecular Function: ATP binding (GO:0005524);; Biological Process: protein phosphorylation (GO:0006468);; Cellular Component: integral component of membrane (GO:0016021);; Molecular Function: carbohydrate binding (GO:0030246);; Biological Process: recognition of pollen (GO:0048544);;	--	--	--	--	--	G-type lectin S-receptor-like serine/threonine-protein kinase SD1-1 OS=Arabidopsis thaliana OX=3702 GN=SD11 PE=1 SV=1	T	Signal transduction mechanisms	G-type lectin S-receptor-like serine/threonine-protein kinase At4g27290 isoform X1 [Helianthus annuus]	molecular function: catalytic activity (GO:0003824);; biological process: metabolic process (GO:0008152);; biological process: cellular process (GO:0009987);; molecular function: binding (GO:0005488);; cellular component: membrane (GO:0016020);; cellular component: membrane part (GO:0044425);; biological process: reproduction (GO:0000003);; biological process: reproductive process (GO:0022414);; …
evm.TU.scaffold_9604.1	evm.TU.scaffold_9604.1	4.69969	211	3.87661	201	2.6526	110	2.04398	85	1.81246	81	2.0407	79	0.0261568	-0.780043	down	--	--	Cellular Component: integral component of membrane (GO:0016021);;	--	--	--	--	--	--	--	--	ion transport domain-containing protein [Artemisia annua]	cellular component: membrane (GO:0016020);; cellular component: membrane part (GO:0044425)
Chrysanthemum_x_morifolium_newGene_38653	--	2.6247	35	3.06551	47	2.51198	31	6.08986	75	9.66901	127	13.5654	154	7.44e-05	1.35857	up	--	--	--	--	--	--	--	--	--	--	--	--	--
evm.TU.scaffold_5351.44	evm.TU.scaffold_5351.44	169.194	878	154.614	929	143.552	685	80.92	389	87.5934	453	72.4076	323	1.09e-07	-0.907467	down	--	--	Cellular Component: integral component of membrane (GO:0016021);;	--	--	--	--	--	--	--	--	hypothetical protein CTI12_AA613040 [Artemisia annua]	cellular component: membrane (GO:0016020);; cellular component: membrane part (GO:0044425)
evm.TU.scaffold_1438.638	evm.TU.scaffold_1438.638	8.37324	108	8.11285	121	7.95412	94	3.20664	39	2.44882	32	2.64506	30	4.18e-05	-1.24939	down	--	--	Molecular Function: DNA binding (GO:0003677);; Molecular Function: transcription factor activity, sequence-specific DNA binding (GO:0003700);; Cellular Component: nucleus (GO:0005634);;	--	--	--	--	AP2 domain	Ethylene-responsive transcription factor WIN1 OS=Arabidopsis thaliana OX=3702 GN=WIN1 PE=2 SV=1	--	--	integrase-type DNA-binding superfamily protein [Artemisia annua]	molecular function: binding (GO:0005488);; molecular function: nucleic acid binding transcription factor activity (GO:0001071);; biological process: biological regulation (GO:0065007);; cellular component: cell (GO:0005623);; cellular component: organelle (GO:0043226);; cellular component: cell part (GO:0044464)
evm.TU.scaffold_737.467	evm.TU.scaffold_737.467	6.32273	229	4.50597	189	3.76141	125	2.48243	83	2.49499	90	2.53319	79	0.015147	-0.811826	down	--	--	Molecular Function: nucleoside transmembrane transporter activity (GO:0005337);; Cellular Component: integral component of membrane (GO:0016021);;	--	--	[F]	Nucleotide transport and metabolism	Nucleoside transporter	Equilibrative nucleotide transporter 3 OS=Arabidopsis thaliana OX=3702 GN=ENT3 PE=1 SV=1	--	--	major facilitator superfamily protein [Artemisia annua]	molecular function: transporter activity (GO:0005215);; biological process: single-organism process (GO:0044699);; biological process: localization (GO:0051179);; cellular component: membrane (GO:0016020);; cellular component: membrane part (GO:0044425)
evm.TU.scaffold_2929.1	evm.TU.scaffold_2929.1	99.4927	926	106.396	1146	144.731	1238	16.51	143	19.873	184	22.3582	179	4.41e-36	-2.34775	down	--	--	Biological Process: lipid transport (GO:0006869);; Molecular Function: lipid binding (GO:0008289);;	--	--	--	--	Protease inhibitor/seed storage/LTP family	Non-specific lipid-transfer protein OS=Helianthus annuus OX=4232 PE=3 SV=1	--	--	lipid transfer protein 3 [Artemisia annua]	biological process: single-organism process (GO:0044699);; biological process: localization (GO:0051179);; molecular function: binding (GO:0005488)
evm.TU.scaffold_807.68	evm.TU.scaffold_807.68	23.0261	734	25.3183	935	21.09	619	39.7415	1174	30.5067	968	37.233	1021	0.00296416	0.587766	up	--	--	Molecular Function: peroxidase activity (GO:0004601);; Biological Process: response to oxidative stress (GO:0006979);; Molecular Function: heme binding (GO:0020037);;	--	--	--	--	Peroxidase	Thylakoid lumenal 29 kDa protein, chloroplastic OS=Solanum lycopersicum OX=4081 GN=CLEB3J9 PE=3 SV=1	--	--	thylakoid lumenal 29 kDa protein [Artemisia annua]	molecular function: catalytic activity (GO:0003824);; molecular function: antioxidant activity (GO:0016209);; biological process: metabolic process (GO:0008152);; biological process: cellular process (GO:0009987);; biological process: single-organism process (GO:0044699);; biological process: response to stimulus (GO:0050896);; biological process: detoxification (GO:0098754);; molecular function:…
evm.TU.scaffold_6250.5	evm.TU.scaffold_6250.5	7.02126	372	12.2189	749	9.89164	482	14.3248	702	20.348	1072	13.9042	633	0.0339789	0.64865	up	[L]	Replication, recombination and repair	Molecular Function: DNA binding (GO:0003677);; Molecular Function: ATP binding (GO:0005524);; Biological Process: DNA replication initiation (GO:0006270);; Cellular Component: MCM complex (GO:0042555);;	--	--	[L]	Replication, recombination and repair	MCM P-loop domain	DNA replication licensing factor MCM3 homolog 3 OS=Zea mays OX=4577 GN=ROA3 PE=2 SV=1	--	--	AAA+ ATPase domain-containing protein [Artemisia annua]	molecular function: binding (GO:0005488);; biological process: metabolic process (GO:0008152);; biological process: cellular process (GO:0009987);; cellular component: macromolecular complex (GO:0032991)
Chrysanthemum_x_morifolium_newGene_29698	--	9.96074	212	12.4349	307	10.1637	199	14.8219	292	22.9344	486	15.4459	283	0.0424177	0.62292	up	--	--	Molecular Function: calcium ion binding (GO:0005509);; Cellular Component: chloroplast thylakoid membrane (GO:0009535);; Cellular Component: photosystem II oxygen evolving complex (GO:0009654);; Biological Process: photosynthesis (GO:0015979);; Cellular Component: extrinsic component of membrane (GO:0019898);; Cellular Component: thylakoid lumen (GO:0031977);;	--	--	--	--	--	PsbP domain-containing protein 5, chloroplastic OS=Arabidopsis thaliana OX=3702 GN=PPD5 PE=1 SV=3	S	Function unknown	psbP domain-containing protein 5, chloroplastic [Lactuca sativa]	molecular function: binding (GO:0005488);; cellular component: cell (GO:0005623);; cellular component: membrane (GO:0016020);; cellular component: organelle (GO:0043226);; cellular component: organelle part (GO:0044422);; cellular component: cell part (GO:0044464);; cellular component: macromolecular complex (GO:0032991);; cellular component: membrane part (GO:0044425);; biological process: metab…
evm.TU.scaffold_1531.120	evm.TU.scaffold_1531.120	1.69983	121	0.768403	63	1.13505	74	2.02195	133	3.02002	213	2.72288	166	0.0258491	0.858831	up	[T]	Signal transduction mechanisms	Molecular Function: protein kinase activity (GO:0004672);; Molecular Function: ATP binding (GO:0005524);; Cellular Component: integral component of membrane (GO:0016021);; Molecular Function: carbohydrate binding (GO:0030246);;	--	--	--	--	Leucine rich repeat	LRR receptor-like serine/threonine-protein kinase FLS2 OS=Arabidopsis thaliana OX=3702 GN=FLS2 PE=1 SV=1	--	--	Concanavalin A-like lectin/glucanase, subgroup [Artemisia annua]	molecular function: catalytic activity (GO:0003824);; biological process: metabolic process (GO:0008152);; biological process: cellular process (GO:0009987);; molecular function: binding (GO:0005488);; cellular component: membrane (GO:0016020);; cellular component: membrane part (GO:0044425)
evm.TU.scaffold_243.120	evm.TU.scaffold_243.120	19.0769	360	23.8125	520	17.6048	305	35.6034	621	31.7077	595	34.0825	552	0.000775742	0.687828	up	--	--	--	--	--	--	--	Protein of unknown function (DUF2488)	Uncharacterized protein ycf54 OS=Porphyra purpurea OX=2787 GN=ycf54 PE=3 SV=1	--	--	hypothetical protein CTI12_AA141230 [Artemisia annua]	--
evm.TU.scaffold_223.75	evm.TU.scaffold_223.75	2.64839	97	2.7201	115	2.59028	87	1.20734	41	1.51915	56	1.20969	38	0.0163943	-0.832532	down	--	--	--	--	--	--	--	--	--	--	--	DNA binding,ATP binding protein [Artemisia annua]	--
Chrysanthemum_x_morifolium_newGene_69156	--	7.3344	132	8.17177	171	7.5858	127	1.74652	32	2.32386	46	1.11423	19	8.2e-08	-1.60055	down	--	--	--	K08869|2.06792e-45|tcc:TCM_042518|K08869 aarF domain-containing kinase | (RefSeq) ABC2	--	[R]	General function prediction only	--	Putative ABC1 protein At2g40090 OS=Arabidopsis thaliana OX=3702 GN=At2g40090 PE=2 SV=2	S	Function unknown	putative ABC1 protein At2g40090 [Helianthus annuus]	--
Chrysanthemum_x_morifolium_newGene_70044	--	9.84624	123	9.12839	132	12.1598	139	4.79934	56	5.4006	67	6.04467	65	0.0146625	-0.793573	down	--	--	Molecular Function: nucleotide binding (GO:0000166);; Molecular Function: RNA binding (GO:0003723);; Molecular Function: metal ion binding (GO:0046872);;	--	--	--	--	--	--	S	Function unknown	PREDICTED: uncharacterized protein LOC8285029 isoform X1 [Ricinus communis]	molecular function: binding (GO:0005488)
evm.TU.scaffold_11260.44	evm.TU.scaffold_11260.44	83.315	1660	86.7754	2002	66.7231	1223	46.8697	865	38.4633	763	41.8258	717	1.59e-06	-0.851961	down	--	--	Molecular Function: enzyme inhibitor activity (GO:0004857);;	--	--	--	--	Plant invertase/pectin methylesterase inhibitor	21 kDa protein OS=Daucus carota OX=4039 PE=2 SV=1	--	--	pectinesterase inhibitor domain-containing protein [Artemisia annua]	molecular function: molecular function regulator (GO:0098772);; biological process: biological regulation (GO:0065007)
evm.TU.scaffold_785.37	evm.TU.scaffold_785.37	1.67537	92	2.47295	157	2.26524	114	3.28015	166	4.12136	225	4.00525	189	0.0148079	0.725084	up	--	--	Cellular Component: integral component of membrane (GO:0016021);;	--	--	[R]	General function prediction only	Calcium-dependent channel, 7TM region, putative phosphate	CSC1-like protein At1g32090 OS=Arabidopsis thaliana OX=3702 GN=At1g32090 PE=1 SV=1	--	--	early-responsive to dehydration stress protein (ERD4) [Artemisia annua]	cellular component: membrane (GO:0016020);; cellular component: membrane part (GO:0044425)
Chrysanthemum_x_morifolium_newGene_19187	--	2.09519	45	0.925082	22	0.415817	9	4.52863	87	5.71499	122	5.92043	109	0.000462848	1.38028	up	[O]	Posttranslational modification, protein turnover, chaperones	Biological Process: protein peptidyl-prolyl isomerization (GO:0000413);; Molecular Function: peptidyl-prolyl cis-trans isomerase activity (GO:0003755);; Biological Process: protein folding (GO:0006457);;	K03768|3.2855e-78|sind:105168448|K03768 peptidyl-prolyl cis-trans isomerase B (cyclophilin B) [EC:5.2.1.8] | (RefSeq) peptidyl-prolyl cis-trans isomerase CYP20-2, chloroplastic	--	[O]	Posttranslational modification, protein turnover, chaperones	--	Photosynthetic NDH subunit of lumenal location 5, chloroplastic OS=Arabidopsis thaliana OX=3702 GN=PNSL5 PE=1 SV=1	O	Posttranslational modification, protein turnover, chaperones	photosynthetic NDH subunit of lumenal location 5, chloroplastic [Lactuca sativa]	biological process: metabolic process (GO:0008152);; biological process: cellular process (GO:0009987);; molecular function: catalytic activity (GO:0003824)
Chrysanthemum_x_morifolium_newGene_7510	--	2.54485	69	1.54862	59	4.87464	112	0.594387	19	1.19436	34	1.56542	26	0.0192415	-1.00881	down	[G]	Carbohydrate transport and metabolism	Molecular Function: UTP:glucose-1-phosphate uridylyltransferase activity (GO:0003983);; Cellular Component: cytosol (GO:0005829);; Cellular Component: plasma membrane (GO:0005886);; Biological Process: glycogen metabolic process (GO:0005977);; Biological Process: UDP-glucose metabolic process (GO:0006011);; Biological Process: pollen development (GO:0009555);; Biological Process: response to salt…	K00963|2.16055e-88|sind:105179334|K00963 UTP--glucose-1-phosphate uridylyltransferase [EC:2.7.7.9] | (RefSeq) UTP--glucose-1-phosphate uridylyltransferase	Pentose and glucuronate interconversions (ko00040);; Galactose metabolism (ko00052);; Starch and sucrose metabolism (ko00500);; Amino sugar and nucleotide sugar metabolism (ko00520)	[G]	Carbohydrate transport and metabolism	--	UTP--glucose-1-phosphate uridylyltransferase 2 OS=Arabidopsis thaliana OX=3702 GN=UGP2 PE=1 SV=1	G	Carbohydrate transport and metabolism	UTP--glucose-1-phosphate uridylyltransferase-like [Helianthus annuus]	molecular function: catalytic activity (GO:0003824);; cellular component: cell (GO:0005623);; cellular component: cell part (GO:0044464);; cellular component: membrane (GO:0016020);; biological process: metabolic process (GO:0008152);; biological process: cellular process (GO:0009987);; biological process: single-organism process (GO:0044699);; biological process: multicellular organismal process…
Chrysanthemum_x_morifolium_newGene_64584	--	23.5247	509	78.1482	1055	56.8356	650	5.00379	101	2.87344	62	4.51898	85	7.66e-26	-2.52191	down	--	--	Cellular Component: integral component of membrane (GO:0016021);;	--	--	--	--	--	--	S	Function unknown	probable serine/threonine protein kinase IRE4 isoform X9 [Durio zibethinus]	cellular component: membrane (GO:0016020);; cellular component: membrane part (GO:0044425)
evm.TU.scaffold_419.214	evm.TU.scaffold_419.214	32.4011	736	24.9453	656	25.4998	533	15.6216	329	17.0834	386	14.5483	284	0.000353121	-0.757583	down	[R]	General function prediction only	Molecular Function: O-methyltransferase activity (GO:0008171);; Biological Process: methylation (GO:0032259);;	--	--	[Q]	Secondary metabolites biosynthesis, transport and catabolism	O-methyltransferase	Caffeoyl-CoA O-methyltransferase OS=Zinnia violacea OX=34245 GN=CCOAOMT PE=2 SV=1	--	--	caffeoyl-CoA O-methyltransferase [Artemisia annua]	molecular function: catalytic activity (GO:0003824);; biological process: metabolic process (GO:0008152)
evm.TU.scaffold_6667.132	evm.TU.scaffold_6667.132	10.3086	409	10.6003	487	9.55882	349	5.4326	200	6.88234	272	5.52145	189	0.00087415	-0.718173	down	--	--	Cellular Component: integral component of membrane (GO:0016021);; Molecular Function: transferase activity, transferring glycosyl groups (GO:0016757);;	--	--	[GM]	Carbohydrate transport and metabolism;; Cell wall/membrane/envelope biogenesis	galactosyl transferase GMA12/MNN10 family	Putative glycosyltransferase 7 OS=Arabidopsis thaliana OX=3702 GN=GT7 PE=2 SV=1	--	--	galactosyl transferase GMA12/MNN10 family protein [Artemisia annua]	cellular component: membrane (GO:0016020);; cellular component: membrane part (GO:0044425);; molecular function: catalytic activity (GO:0003824)
Chrysanthemum_x_morifolium_newGene_67183	--	11.1491	143	7.73123	154	13.302	119	5.67759	74	3.97008	79	5.59219	69	0.0319928	-0.670107	down	--	--	Molecular Function: transporter activity (GO:0005215);; Biological Process: oligopeptide transport (GO:0006857);; Cellular Component: integral component of membrane (GO:0016021);;	K14638|2.56396e-36|pmum:103320492|K14638 solute carrier family 15 (peptide/histidine transporter), member 3/4 | (RefSeq) protein NRT1/ PTR FAMILY 8.2-like	--	[E]	Amino acid transport and metabolism	--	Protein NRT1/ PTR FAMILY 8.1 OS=Arabidopsis thaliana OX=3702 GN=NPF8.1 PE=1 SV=1	E	Amino acid transport and metabolism	protein NRT1/ PTR FAMILY 8.2-like [Lactuca sativa]	molecular function: transporter activity (GO:0005215);; biological process: localization (GO:0051179);; cellular component: membrane (GO:0016020);; cellular component: membrane part (GO:0044425)
Chrysanthemum_x_morifolium_newGene_14800	--	9.34084	94	8.92932	103	8.3131	77	2.416	23	2.74224	28	1.90611	17	7.08e-06	-1.44487	down	--	--	--	--	--	--	--	--	--	--	--	--	--
evm.TU.scaffold_10217.106	evm.TU.scaffold_10217.106	11.3766	275	12.488	350	11.4603	255	24.3502	545	17.5604	422	19.105	397	0.00110381	0.720714	up	[E]	Amino acid transport and metabolism	Molecular Function: cysteine synthase activity (GO:0004124);; Cellular Component: mitochondrion (GO:0005739);; Biological Process: cysteine biosynthetic process from serine (GO:0006535);; Biological Process: cyanide metabolic process (GO:0019499);; Molecular Function: L-3-cyanoalanine synthase activity (GO:0050017);;	--	--	[E]	Amino acid transport and metabolism	Pyridoxal-phosphate dependent enzyme	Bifunctional L-3-cyanoalanine synthase/cysteine synthase 1, mitochondrial OS=Solanum tuberosum OX=4113 GN=PCAS-1 PE=1 SV=1	--	--	cycloartenol synthase [Artemisia annua]	molecular function: catalytic activity (GO:0003824);; cellular component: cell (GO:0005623);; cellular component: organelle (GO:0043226);; cellular component: cell part (GO:0044464);; biological process: metabolic process (GO:0008152);; biological process: cellular process (GO:0009987);; biological process: single-organism process (GO:0044699)
Chrysanthemum_x_morifolium_newGene_44092	--	4.85129	52	12.5781	156	11.476	113	3.64562	37	3.94482	43	4.26237	40	0.0381232	-0.895633	down	--	--	--	--	--	--	--	--	--	--	--	--	--
Chrysanthemum_x_morifolium_newGene_101587	--	5.2005	257	5.31467	304	4.80296	219	3.23062	148	2.64511	130	2.71728	116	0.0012351	-0.766116	down	--	--	Molecular Function: transcription cofactor activity (GO:0003712);; Molecular Function: histone acetyltransferase activity (GO:0004402);; Cellular Component: nucleus (GO:0005634);; Biological Process: regulation of transcription, DNA-templated (GO:0006355);; Molecular Function: zinc ion binding (GO:0008270);; Biological Process: histone acetylation (GO:0016573);;	K04498|0|gra:105767666|K04498 E1A/CREB-binding protein [EC:2.3.1.48] | (RefSeq) histone acetyltransferase HAC1-like	--	[K]	Transcription	--	Histone acetyltransferase HAC1 OS=Arabidopsis thaliana OX=3702 GN=HAC1 PE=1 SV=2	B	Chromatin structure and dynamics	histone acetyltransferase HAC1-like [Lactuca sativa]	molecular function: transcription factor activity, protein binding (GO:0000988);; biological process: biological regulation (GO:0065007);; molecular function: catalytic activity (GO:0003824);; cellular component: cell (GO:0005623);; cellular component: organelle (GO:0043226);; cellular component: cell part (GO:0044464);; molecular function: binding (GO:0005488);; biological process: metabolic pro…
evm.TU.scaffold_563.85	evm.TU.scaffold_563.85	5.03376	469	3.94367	426	4.05814	348	1.6299	141	1.8416	171	0.98496	79	2.68e-07	-1.33366	down	[T]	Signal transduction mechanisms	Molecular Function: ATP binding (GO:0005524);; Cellular Component: integral component of membrane (GO:0016021);; Molecular Function: ATPase activity (GO:0016887);;	--	--	[Q]	Secondary metabolites biosynthesis, transport and catabolism	ABC-2 type transporter	ABC transporter G family member 32 OS=Arabidopsis thaliana OX=3702 GN=ABCG32 PE=1 SV=1	--	--	pleiotropic drug resistance protein PDR/CDR [Artemisia annua]	molecular function: binding (GO:0005488);; cellular component: membrane (GO:0016020);; cellular component: membrane part (GO:0044425);; molecular function: catalytic activity (GO:0003824)
Chrysanthemum_x_morifolium_newGene_30280	--	2.11908	23	3.13983	40	3.48171	35	0.537638	6	0	0	0	0	0.00393333	-1.20839	down	--	--	--	--	--	--	--	--	--	--	--	--	--
evm.TU.scaffold_250.308	evm.TU.scaffold_250.308	21.897	537	20.3221	577	15.1791	342	12.6509	287	10.7585	263	11.5524	244	0.00968151	-0.658708	down	--	--	Molecular Function: DNA binding (GO:0003677);; Cellular Component: nucleus (GO:0005634);;	--	--	[O]	Posttranslational modification, protein turnover, chaperones	Myb-like DNA-binding domain	Transcription factor DIVARICATA OS=Antirrhinum majus OX=4151 GN=DIVARICATA PE=2 SV=1	--	--	hypothetical protein CTI12_AA250020 [Artemisia annua]	molecular function: binding (GO:0005488);; cellular component: cell (GO:0005623);; cellular component: organelle (GO:0043226);; cellular component: cell part (GO:0044464)
evm.TU.scaffold_1298.128	evm.TU.scaffold_1298.128	1.0642	20	1.19598	26	1.68394	29	0.290798	5	0	0	0	0	0.011952	-1.07952	down	--	--	--	--	--	--	--	Senescence regulator	--	--	--	senescence regulator S40 [Artemisia annua]	--
evm.TU.scaffold_1146.141	evm.TU.scaffold_1146.141	168.98	1023	181.13	1269	224.808	1251	105.287	591	146.485	883	91.1633	475	0.00846	-0.676803	down	--	--	Biological Process: lipid transport (GO:0006869);;	--	--	--	--	Probable lipid transfer	Non-specific lipid-transfer protein 2 OS=Prunus armeniaca OX=36596 PE=1 SV=1	--	--	hypothetical protein CTI12_AA306510 [Artemisia annua]	biological process: single-organism process (GO:0044699);; biological process: localization (GO:0051179)
Chrysanthemum_x_morifolium_newGene_45738	--	1.42929	21	1.97397	32	1.08687	16	3.79432	53	3.94989	53	3.74631	49	0.0225368	0.951282	up	--	--	Molecular Function: ATP binding (GO:0005524);; Cellular Component: nucleus (GO:0005634);; Cellular Component: cytoplasm (GO:0005737);; Biological Process: mitotic cell cycle (GO:0007067);; Molecular Function: histone kinase activity (H3-T11 specific) (GO:0035402);; Biological Process: histone H3-T11 phosphorylation (GO:0035407);; Biological Process: intracellular signal transduction (GO:0035556);…	K16315|6.72043e-27|sind:105168997|K16315 serine/threonine-protein kinase haspin [EC:2.7.11.1] | (RefSeq) uncharacterized LOC105168997	--	[D]	Cell cycle control, cell division, chromosome partitioning	--	Serine/threonine-protein kinase haspin homolog OS=Arabidopsis thaliana OX=3702 GN=HASPIN PE=1 SV=1	D	Cell cycle control, cell division, chromosome partitioning	serine/threonine-protein kinase haspin homolog [Lactuca sativa]	molecular function: binding (GO:0005488);; cellular component: cell (GO:0005623);; cellular component: organelle (GO:0043226);; cellular component: cell part (GO:0044464);; molecular function: catalytic activity (GO:0003824);; biological process: metabolic process (GO:0008152);; biological process: cellular process (GO:0009987);; biological process: cellular component organization or biogenesis (…
evm.TU.scaffold_74.346	evm.TU.scaffold_74.346	10.5636	511	10.1446	568	9.54119	424	18.9834	850	15.157	729	18.6716	776	2.42e-05	0.752321	up	[L]	Replication, recombination and repair	Molecular Function: RNA binding (GO:0003723);; Molecular Function: helicase activity (GO:0004386);; Molecular Function: ATP binding (GO:0005524);; Cellular Component: nucleus (GO:0005634);; Molecular Function: zinc ion binding (GO:0008270);;	--	--	[A]	RNA processing and modification	DEAD/DEAH box helicase	DEAD-box ATP-dependent RNA helicase 3, chloroplastic OS=Oryza sativa subsp. japonica OX=39947 GN=Os03g0827700 PE=2 SV=2	--	--	zinc finger, CCHC-type [Artemisia annua]	molecular function: binding (GO:0005488);; molecular function: catalytic activity (GO:0003824);; cellular component: cell (GO:0005623);; cellular component: organelle (GO:0043226);; cellular component: cell part (GO:0044464)
evm.TU.scaffold_1694.180	evm.TU.scaffold_1694.180	19.2492	137	13.5012	111	15.8739	104	9.14016	61	4.70528	34	9.21543	57	0.0419463	-0.82293	down	--	--	--	--	--	--	--	cAMP-regulated phosphoprotein/endosulfine conserved region	--	--	--	endosulphine [Artemisia annua]	--
evm.TU.scaffold_620.98	evm.TU.scaffold_620.98	2.08902	71	2.09403	82	1.90515	60	9.27429	291	9.16693	309	8.20831	239	9.13e-22	1.91143	up	--	--	Molecular Function: aspartic-type endopeptidase activity (GO:0004190);;	--	--	[O]	Posttranslational modification, protein turnover, chaperones	Xylanase inhibitor C-terminal	Chitinase CLP OS=Oryza sativa subsp. japonica OX=39947 GN=CLP PE=1 SV=1	--	--	aspartic peptidase A1 family [Artemisia annua]	molecular function: catalytic activity (GO:0003824);; biological process: metabolic process (GO:0008152)
evm.TU.scaffold_5952.1	evm.TU.scaffold_5952.1	7.80906	324	7.0808	340	4.98255	190	3.04357	117	2.90263	120	2.21267	79	5.53e-05	-1.10856	down	[I]	Lipid transport and metabolism	Molecular Function: hydrolase activity (GO:0016787);;	--	--	[R]	General function prediction only	alpha/beta hydrolase fold	Probable lysophospholipase BODYGUARD 1 OS=Arabidopsis thaliana OX=3702 GN=BDG1 PE=2 SV=1	--	--	alpha/Beta hydrolase fold protein [Artemisia annua]	molecular function: catalytic activity (GO:0003824)
evm.TU.scaffold_1147.36	evm.TU.scaffold_1147.36	17.3751	722	21.393	1030	18.5794	710	31.9583	1230	36.8654	1525	32.2333	1152	7.57e-07	0.775557	up	[O]	Posttranslational modification, protein turnover, chaperones	Molecular Function: ATP binding (GO:0005524);; Biological Process: protein refolding (GO:0042026);;	--	--	[O]	Posttranslational modification, protein turnover, chaperones	TCP-1/cpn60 chaperonin family	RuBisCO large subunit-binding protein subunit alpha, chloroplastic OS=Pisum sativum OX=3888 PE=1 SV=2	--	--	RuBisCO large subunit-binding protein subunit alpha [Artemisia annua]	molecular function: binding (GO:0005488);; biological process: cellular process (GO:0009987)
evm.TU.scaffold_10558.76	evm.TU.scaffold_10558.76	5.44504	87	4.81094	89	8.33891	123	2.20653	33	3.59897	58	1.44997	20	0.0282959	-0.93959	down	--	--	Cellular Component: apoplast (GO:0048046);;	--	--	--	--	Dirigent-like protein	Dirigent protein 23 OS=Arabidopsis thaliana OX=3702 GN=DIR23 PE=2 SV=1	--	--	plant disease resistance response protein [Artemisia annua]	cellular component: extracellular region (GO:0005576)
evm.TU.scaffold_261.16	evm.TU.scaffold_261.16	16.9025	368	16.6873	420	27.1392	543	8.93075	180	10.3562	224	9.84647	184	0.000339481	-0.936734	down	--	--	Molecular Function: endopeptidase inhibitor activity (GO:0004866);;	--	--	--	--	Trypsin and protease inhibitor	Miraculin OS=Synsepalum dulcificum OX=3743 PE=1 SV=3	--	--	kunitz family trypsin and protease inhibitor protein [Artemisia annua]	molecular function: molecular function regulator (GO:0098772);; biological process: biological regulation (GO:0065007)
Chrysanthemum_x_morifolium_newGene_46516	--	4.81758	92	4.17072	82	6.04127	110	1.17772	19	2.23844	45	2.19187	38	0.0188339	-0.972262	down	--	--	Cellular Component: nucleolus (GO:0005730);; Biological Process: rRNA processing (GO:0006364);; Biological Process: embryo development ending in seed dormancy (GO:0009793);; Biological Process: embryonic pattern specification (GO:0009880);; Cellular Component: small-subunit processome (GO:0032040);; Biological Process: cell division (GO:0051301);;	K14555|9.49176e-44|pper:PRUPE_ppa001237mg|K14555 U3 small nucleolar RNA-associated protein 13 | (RefSeq) hypothetical protein	Ribosome biogenesis in eukaryotes (ko03008)	[A]	RNA processing and modification	Utp13 specific WD40 associated domain	--	S	Function unknown	transducin beta-like protein 3 [Helianthus annuus]	cellular component: cell (GO:0005623);; cellular component: organelle (GO:0043226);; cellular component: organelle part (GO:0044422);; cellular component: cell part (GO:0044464);; biological process: metabolic process (GO:0008152);; biological process: cellular process (GO:0009987);; biological process: reproduction (GO:0000003);; biological process: reproductive process (GO:0022414);; biological…
evm.TU.scaffold_5200.7	evm.TU.scaffold_5200.7	3.00918	86	3.89084	128	3.70291	97	0.946196	25	1.88502	54	0.832342	21	0.00351138	-1.10736	down	[P]	Inorganic ion transport and metabolism	Cellular Component: integral component of membrane (GO:0016021);; Molecular Function: metal ion transmembrane transporter activity (GO:0046873);;	--	--	[P]	Inorganic ion transport and metabolism	Natural resistance-associated macrophage protein	Metal transporter Nramp5 OS=Oryza sativa subsp. japonica OX=39947 GN=NRAMP5 PE=2 SV=1	--	--	metal transporter NRAT1 [Artemisia annua]	cellular component: membrane (GO:0016020);; cellular component: membrane part (GO:0044425);; molecular function: transporter activity (GO:0005215);; biological process: localization (GO:0051179)
evm.TU.scaffold_7854.85	evm.TU.scaffold_7854.85	0.24293	8	0.358553	14	0.171193	6	0.860396	27	0.954394	32	0.902711	26	0.0360612	0.989444	up	[QV]	Secondary metabolites biosynthesis, transport and catabolism;; Defense mechanisms	Molecular Function: monooxygenase activity (GO:0004497);; Molecular Function: iron ion binding (GO:0005506);; Cellular Component: integral component of membrane (GO:0016021);; Molecular Function: oxidoreductase activity, acting on paired donors, with incorporation or reduction of molecular oxygen (GO:0016705);; Molecular Function: heme binding (GO:0020037);;	--	--	[Q]	Secondary metabolites biosynthesis, transport and catabolism	Cytochrome P450	Cytochrome P450 82A3 OS=Glycine max OX=3847 GN=CYP82A3 PE=2 SV=1	--	--	cytochrome P450 [Artemisia annua]	molecular function: catalytic activity (GO:0003824);; biological process: metabolic process (GO:0008152);; biological process: single-organism process (GO:0044699);; molecular function: binding (GO:0005488);; cellular component: membrane (GO:0016020);; cellular component: membrane part (GO:0044425)
Chrysanthemum_x_morifolium_newGene_1317	--	4.73076	72	4.91967	70	4.56675	62	1.59273	24	2.25555	36	1.58371	22	0.0269277	-0.893205	down	--	--	--	--	--	--	--	--	Protein STRUBBELIG-RECEPTOR FAMILY 2 OS=Arabidopsis thaliana OX=3702 GN=SRF2 PE=2 SV=1	T	Signal transduction mechanisms	hypothetical protein Ccrd_009509, partial [Cynara cardunculus var. scolymus]	--
evm.TU.scaffold_1763.661	evm.TU.scaffold_1763.661	3.36022	198	2.69476	184	2.99842	163	5.71777	313	3.93621	231	4.7352	240	0.0499153	0.591127	up	[TK]	Signal transduction mechanisms;; Transcription	Biological Process: phosphorelay signal transduction system (GO:0000160);; Cellular Component: nucleus (GO:0005634);;	--	--	[K]	Transcription	Response regulator receiver domain	Two-component response regulator-like APRR7 OS=Arabidopsis thaliana OX=3702 GN=APRR7 PE=1 SV=1	--	--	CCT domain-containing protein [Artemisia annua]	biological process: cellular process (GO:0009987);; biological process: signaling (GO:0023052);; biological process: single-organism process (GO:0044699);; biological process: response to stimulus (GO:0050896);; biological process: biological regulation (GO:0065007);; cellular component: cell (GO:0005623);; cellular component: organelle (GO:0043226);; cellular component: cell part (GO:0044464)
Chrysanthemum_x_morifolium_newGene_104158	--	10.6624	71	11.3853	88	9.894	61	3.76003	24	0.7832	6	0.650504	4	0.000849855	-1.37325	down	--	--	Molecular Function: oxidoreductase activity, acting on CH-OH group of donors (GO:0016614);; Molecular Function: lyase activity (GO:0016829);; Molecular Function: flavin adenine dinucleotide binding (GO:0050660);; Biological Process: oxidation-reduction process (GO:0055114);;	K08248|1.79065e-12|bna:106354249|K08248 (R)-mandelonitrile lyase [EC:4.1.2.10] | (RefSeq) (R)-mandelonitrile lyase-like	Cyanoamino acid metabolism (ko00460)	[R]	General function prediction only	--	(R)-mandelonitrile lyase-like OS=Arabidopsis thaliana OX=3702 GN=At1g73050 PE=2 SV=1	E	Amino acid transport and metabolism	(R)-mandelonitrile lyase-like [Lactuca sativa]	molecular function: catalytic activity (GO:0003824);; biological process: metabolic process (GO:0008152);; biological process: single-organism process (GO:0044699);; molecular function: binding (GO:0005488)
evm.TU.scaffold_1102.137	evm.TU.scaffold_1102.137	1.6787	49	0.905439	31	1.12969	30	0.364014	10	0.364165	11	0.096157	3	0.0188339	-1.077	down	--	--	Molecular Function: catalytic activity (GO:0003824);; Molecular Function: iron-sulfur cluster binding (GO:0051536);;	--	--	--	--	--	--	--	--	hypothetical protein LSAT_0X39381 [Lactuca sativa]	molecular function: catalytic activity (GO:0003824);; molecular function: binding (GO:0005488)
evm.TU.scaffold_10679.4	evm.TU.scaffold_10679.4	19.0638	221	16.6383	224	15.7296	168	41.6572	448	29.4308	340	26.8524	268	0.00213837	0.818927	up	--	--	--	--	--	--	--	--	--	--	--	hypothetical protein CTI12_AA099270 [Artemisia annua]	--
evm.TU.scaffold_837.102	evm.TU.scaffold_837.102	1.71125	53	2.2558	80	2.24896	63	3.23571	92	4.14432	126	3.90894	103	0.0411192	0.719062	up	--	--	--	--	--	[B]	Chromatin structure and dynamics	DEK C terminal domain	--	--	--	hypothetical protein E3N88_39489 [Mikania micrantha]	--
evm.TU.scaffold_4503.31	evm.TU.scaffold_4503.31	2.76115	116	2.51456	122	2.28007	88	4.77543	185	5.57074	232	6.02665	217	5.87e-05	0.984733	up	--	--	--	--	--	[R]	General function prediction only	Zinc-finger double-stranded RNA-binding	Zinc finger protein JACKDAW OS=Arabidopsis thaliana OX=3702 GN=JKD PE=1 SV=1	--	--	Zinc finger, C2H2 [Artemisia annua]	--
evm.TU.scaffold_797.43	evm.TU.scaffold_797.43	1.91474	102	1.93196	119	2.02538	99	3.26806	161	3.93191	208	3.09498	142	0.0100135	0.718872	up	--	--	Molecular Function: RNA cap binding (GO:0000339);; Cellular Component: nuclear cap binding complex (GO:0005846);; Biological Process: mRNA cis splicing, via spliceosome (GO:0045292);; Biological Process: mRNA transport (GO:0051028);;	--	--	[A]	RNA processing and modification	MIF4G like	Nuclear cap-binding protein subunit 1 OS=Arabidopsis thaliana OX=3702 GN=ABH1 PE=1 SV=2	--	--	ARM repeat superfamily protein [Artemisia annua]	molecular function: binding (GO:0005488);; cellular component: cell (GO:0005623);; cellular component: macromolecular complex (GO:0032991);; cellular component: cell part (GO:0044464);; biological process: metabolic process (GO:0008152);; biological process: cellular process (GO:0009987);; biological process: localization (GO:0051179)
evm.TU.scaffold_814.68	evm.TU.scaffold_814.68	49.9111	983	50.5202	1152	35.4032	642	32.6146	595	24.7888	486	23.1101	392	0.00753298	-0.690727	down	[R]	General function prediction only	Molecular Function: chitinase activity (GO:0004568);; Biological Process: carbohydrate metabolic process (GO:0005975);; Biological Process: chitin catabolic process (GO:0006032);; Biological Process: cell wall macromolecule catabolic process (GO:0016998);;	--	--	[R]	General function prediction only	Chitinase class I	Chitinase-like protein 2 OS=Arabidopsis thaliana OX=3702 GN=CTL2 PE=2 SV=1	--	--	Glycoside hydrolase, family 19 [Artemisia annua]	molecular function: catalytic activity (GO:0003824);; biological process: metabolic process (GO:0008152);; biological process: cellular process (GO:0009987)
evm.TU.scaffold_3092.86	evm.TU.scaffold_3092.86	13.4256	88	12.791	97	11.084	67	6.39236	39	6.10082	40	4.31245	25	0.0176661	-0.892935	down	--	--	--	--	--	--	--	--	--	--	--	--	--
evm.TU.scaffold_7329.113	evm.TU.scaffold_7329.113	6.93019	208	7.35881	256	8.6707	239	12.5411	349	13.6365	407	12.6053	325	0.000571231	0.704281	up	[I]	Lipid transport and metabolism	Molecular Function: enoyl-[acyl-carrier-protein] reductase (NADH) activity (GO:0004318);; Biological Process: fatty acid biosynthetic process (GO:0006633);;	--	--	[R]	General function prediction only	Enoyl-(Acyl carrier protein) reductase	Enoyl-[acyl-carrier-protein] reductase [NADH], chloroplastic OS=Brassica napus OX=3708 PE=1 SV=2	--	--	enoyl-ACP reductase 1 [Artemisia annua]	molecular function: catalytic activity (GO:0003824);; biological process: metabolic process (GO:0008152);; biological process: single-organism process (GO:0044699);; biological process: cellular process (GO:0009987)
evm.TU.scaffold_asm16_new.2109	evm.TU.scaffold_asm16_new.2109	101.389	451	76.0365	392	80.6934	330	52.1294	215	53.1294	236	54.4011	208	0.00888971	-0.641008	down	--	--	--	--	--	--	--	--	--	--	--	--	--
[truncated: 2,009 more rows]
