# Supplementary material
Source: MDPI journal article supplement (https://www.mdpi.com/2311-7524/9/4/428)
Supplement: s1 [file s1 › Table S5 Differentially expressed genes related to flowering time following ethephon treatment.xlsx]

## Sheet: Sheet1
Table S5. Differentially expressed genes related to flowering time following ethephon treatment
Gene_ID	Log2 FC	FDR	Annotation
evm.TU.scaffold_161.24	-1.7	1.11744e-05	APETALA1 and FRUITFULL-like protein(AFL1)
evm.TU.scaffold_573.137	-1.29	0.00155828	APETALA1 and FRUITFULL-like protein(AFL1)
evm.TU.scaffold_1333.596	-0.94	0.0389933	SQUAMOSA promoter binding protein-like 5
evm.TU.scaffold_1638.381	-1.03	0.0182121	SQUAMOSA promoter binding protein-like 5
evm.TU.scaffold_1019.180	-0.88	0.0328261	SQUAMOSA promoter binding protein-like 9
Chrysanthemum_x_morifolium_newGene_91357	-0.88	0.0400131	SQUAMOSA promoter binding protein-like 7
evm.TU.scaffold_254.123	-1.28	9.5138e-14	SQUAMOSA promoter binding protein-like 1
evm.TU.scaffold_1266.29	-1.31	5.82724e-14	SQUAMOSA promoter binding protein-like 1
evm.TU.scaffold_9466.10	1.5	0.000145121	TERMINAL FLOWER 1 (TFL1)
evm.TU.scaffold_1536.8	1.36	0.000961877	TERMINAL FLOWER 1 (TFL1)
Note: Significant differences were determined at FDR ≤ 0.05 and FC ≥ 1.5. FC: fold change.
